# Supplementary material
Source: MDPI journal article supplement (https://www.mdpi.com/2073-4344/12/3/343)
Supplement: s1 [file s1]

## SUPPLEMENTARY MATERIALS FILE 2

# Systematic Functional and Computational Analysis of Sugar-Binding Residues in *Thermoanaerobacterium xylanolyticum* Family GH116 $\beta$ -Glucosidase

Meng Huang<sup>1,2</sup>, Salila Pengthaisong<sup>1,2</sup>, Ratana Charoenwattanasatien<sup>3</sup>, Natechanok Thinkumrob<sup>4</sup>, Jitrayut Jitonnorn<sup>4\*</sup>, James R. Ketudat Cairns<sup>1,2\*</sup>

<sup>1</sup>School of Chemistry, Institute of Science, Suranaree University of Technology, Nakhon Ratchasima 30000, Thailand

<sup>2</sup>Center for Biomolecular Structure, Function and Application, Suranaree University of Technology, Nakhon Ratchasima 30000, Thailand

<sup>3</sup>Research Facility Department, Synchrotron Light Research Institute (Public Organization), Nakhon Ratchasima 30000, Thailand

<sup>4</sup>Unit of Excellence in Computational Molecular Science and Catalysis, and Division of Chemistry, School of Science, University of Phayao, Phayao 56000, Thailand

\*Corresponding authors

**Cartesian Coordinates**

| Glc_wt |    |             |             | ONfOM: extrapolated energy = -3352.681214 au |   |   |   |   |    |              |            |             |   |
|--------|----|-------------|-------------|----------------------------------------------|---|---|---|---|----|--------------|------------|-------------|---|
| N      | -1 | 3.09416500  | -7.63267500 | 2.22942500                                   | L | H | 4 | C | 0  | -1.25000200  | 5.14851700 | 0.95312300  | H |
| C      | -1 | 1.92871500  | -6.78322300 | 2.12646800                                   | L |   |   | O | 0  | -1.40945200  | 4.09033600 | 0.34227500  | H |
| C      | -1 | 2.28680600  | -5.54113900 | 1.26490100                                   | L |   |   | N | 0  | -1.89091200  | 6.30429400 | 0.60951300  | H |
| C      | 0  | 1.21879600  | -4.48347000 | 1.07482100                                   | H |   |   | C | -1 | -2.90356400  | 6.37429200 | -0.50741600 | L |
| C      | 0  | 1.59827900  | -3.46960200 | -0.06535200                                  | H |   |   | C | -1 | -4.01451500  | 7.35778200 | -0.13523400 | L |
| O      | 0  | 2.78577700  | -3.03119600 | -0.09264200                                  | H |   |   | C | -1 | -4.78675000  | 6.93459100 | 1.12117100  | L |
| O      | 0  | 0.66228200  | -3.12685500 | -0.84528800                                  | H |   |   | C | -1 | -5.04113300  | 7.29862800 | 2.38666900  | L |
| C      | -1 | 0.79592000  | -7.54821200 | 1.42836600                                   | L |   |   | C | -1 | -6.18721300  | 6.15060100 | 3.40579500  | L |
| O      | -1 | -0.38484400 | -7.44659400 | 1.85149700                                   | L |   |   | O | -1 | -6.88652100  | 5.77098000 | 4.54697200  | L |
| N      | -1 | 1.46350000  | -7.20474700 | -4.93727200                                  | L |   |   | C | -1 | -6.64680600  | 5.78910700 | 2.16087700  | L |
| C      | -1 | 2.47859400  | -6.20747600 | -4.66355000                                  | L |   |   | C | -1 | -5.93414400  | 6.17393000 | 1.02295300  | L |
| C      | -1 | 1.85488100  | -4.91641000 | -4.09491800                                  | L |   |   | C | -1 | -2.13593000  | 6.80545200 | -1.75598400 | L |
| C      | -1 | 0.54802100  | -4.45598400 | -4.72009700                                  | L |   |   | O | -1 | -2.17503700  | 7.98022600 | -2.16242900 | L |
| C      | -1 | 0.37889000  | -4.40089900 | -6.09482400                                  | L |   |   | N | -1 | -1.45119800  | 5.83812200 | -2.36602000 | L |
| C      | -1 | -0.81109600 | -3.94304600 | -6.65219400                                  | L |   |   | C | -1 | -0.38482000  | 5.10512000 | -3.36555200 | L |
| C      | -1 | -1.82854900 | -3.50033900 | -5.82476800                                  | L |   |   | C | 0  | 0.52374400   | 4.87025400 | -3.46206800 | H |
| O      | -1 | -3.01797800 | -3.04231400 | -6.33113500                                  | L |   |   | C | 0  | -0.12511300  | 3.53984200 | -3.98645900 | H |
| C      | -1 | -1.67571300 | -3.53910800 | -4.45162200                                  | L |   |   | O | 0  | -1.37594000  | 3.42189100 | -4.03170800 | H |
| C      | -1 | -0.49150500 | -4.00524400 | -3.91263400                                  | L |   |   | O | 0  | 0.72924500   | 2.64851500 | -4.28503800 | H |
| C      | -1 | 3.43031200  | -6.83950400 | -3.66024600                                  | L |   |   | C | -1 | -0.86979200  | 6.54989200 | -4.73410500 | L |
| O      | -1 | 3.23987200  | -6.68123900 | -2.42644900                                  | L |   |   | O | -1 | -0.02995900  | 6.67223200 | -5.66323300 | L |
| N      | -1 | 5.99545800  | -7.17444700 | -1.62332600                                  | L |   |   | N | -1 | -8.93813600  | 5.69319100 | -5.35205600 | L |
| C      | -1 | 6.90918400  | -6.40081200 | -0.79022500                                  | L |   |   | C | -1 | -8.74912800  | 5.32728400 | -3.93698100 | L |
| C      | -1 | 6.55435400  | -4.91831100 | -0.84180500                                  | L |   |   | C | -1 | -7.32733500  | 5.63044400 | -3.49345100 | L |
| C      | -1 | 6.43615200  | -4.39469000 | -2.24949400                                  | L |   |   | C | -1 | -6.30915600  | 4.67141000 | -4.10319400 | L |
| C      | -1 | 7.47827200  | -4.60933900 | -3.15802700                                  | L |   |   | C | -1 | -4.89562700  | 4.95454600 | -3.67980800 | L |
| C      | -1 | 7.38700700  | -4.17302200 | -4.45919600                                  | L |   |   | O | -1 | -4.56608900  | 6.06323400 | -3.23805500 | L |
| C      | -1 | 6.24539400  | -3.52684600 | -4.86449500                                  | L |   |   | N | -1 | -4.02974600  | 3.96426800 | -3.81274700 | L |
| O      | -1 | 6.20456100  | -3.09327800 | -6.16296600                                  | L |   |   | C | -1 | -9.77098400  | 6.03210500 | -3.03955800 | L |
| C      | -1 | 5.19212300  | -3.29980600 | -4.00623600                                  | L |   |   | O | -1 | -10.20562500 | 5.45645400 | -2.00840200 | L |
| C      | -1 | 5.2         |             |                                              |   |   |   |   |    |              |            |             |   |

|   |    |             |             |              |   |   |    |              |             |             |   |
|---|----|-------------|-------------|--------------|---|---|----|--------------|-------------|-------------|---|
| O | -1 | -5.25675200 | -4.24901700 | 8.24854000   | L | H | -1 | -6.29732900  | 5.86021800  | 0.03453300  | L |
| C | 0  | 0.61630600  | -0.53211500 | -2.91714200  | H | H | -1 | -4.67167500  | 7.20933500  | 4.52202900  | L |
| O | 0  | 0.89139500  | -0.23596200 | -4.25690400  | H | H | -1 | -7.55303800  | 5.18152700  | 2.03667300  | L |
| C | 0  | 1.68840300  | 0.07713800  | -1.96142700  | H | H | -1 | -7.63588200  | 5.26566700  | 4.25799100  | L |
| O | 0  | 2.81155200  | -0.78354700 | -1.87744100  | H | H | -1 | -3.35489600  | 5.34366000  | -0.61493400 | L |
| O | 0  | -0.72247200 | -0.04510900 | -2.71175400  | H | H | 0  | -1.68573300  | 7.15345900  | 1.12763200  | H |
| C | 0  | -1.16735700 | 0.31422000  | -1.41672500  | H | H | 0  | 1.40295200   | 5.09269000  | -4.09850900 | H |
| C | 0  | -0.15968300 | 1.20528100  | -0.68290900  | H | H | 0  | 0.96078000   | 4.63076700  | -2.46794900 | H |
| O | 0  | -0.63128200 | 1.50422600  | 0.63429200   | H | H | -1 | 0.21161000   | 6.96671000  | -2.96544000 | L |
| C | 0  | 1.18254000  | 0.49837200  | -0.57647400  | H | H | -1 | -1.93879900  | 4.96450900  | -2.49922200 | L |
| O | 0  | 2.14885400  | 1.39342800  | -0.024773400 | H | H | -1 | -7.26546300  | 5.56788800  | -2.38532800 | L |
| C | 0  | -2.48095100 | 1.04135700  | -1.64334600  | H | H | -1 | -7.04797300  | 6.67780300  | -3.73710900 | L |
| O | 0  | -3.52070400 | 0.10880100  | -2.02799100  | H | H | -1 | -6.60116000  | 3.62887900  | -3.84433900 | L |
| H | -1 | 2.63360400  | -5.89072100 | 0.26624600   | L | H | -1 | -6.36442100  | 4.72926000  | -5.21054100 | L |
| H | -1 | 3.17276400  | -5.05327200 | 1.72946100   | L | H | -1 | -4.30166400  | 3.17996000  | -4.38238400 | L |
| H | 0  | 0.23102500  | -4.92334800 | 0.82963200   | H | H | -1 | -3.01659400  | 4.04056700  | -3.67853000 | L |
| H | 0  | 1.08025200  | -3.87143000 | 2.00139400   | H | H | -1 | -8.92348800  | 4.22215800  | -3.87871600 | L |
| H | -1 | 1.61871000  | -6.46792100 | 3.15070800   | L | H | -1 | -9.88978000  | 5.54438500  | -5.61450400 | L |
| H | -1 | 3.41980400  | -7.90389000 | 1.32444400   | L | H | -1 | -8.69900500  | 6.65177400  | -5.50156800 | L |
| H | -1 | 3.81514100  | -7.17374500 | 2.74452200   | L | H | -1 | -8.10892700  | 0.19698200  | 3.23819800  | L |
| H | -1 | 1.68521600  | -5.01535800 | -3.00173000  | L | H | -1 | -9.12148100  | 1.64962200  | 3.31140000  | L |
| H | -1 | 2.59752100  | -4.09413500 | -4.20585500  | L | H | -1 | -9.85399600  | 0.88551000  | -0.11989700 | L |
| H | -1 | 1.18946700  | -4.72744900 | -6.75744900  | L | H | -1 | -8.02853500  | 1.59291000  | -1.74720000 | L |
| H | -1 | -0.38348400 | -4.01778200 | -2.81911300  | L | H | -1 | -6.04545200  | 1.90113800  | 3.17173100  | L |
| H | -1 | -0.91396700 | -3.91671200 | -7.74405600  | L | H | -1 | -3.96065300  | 3.00198700  | 2.29026900  | L |
| H | -1 | -2.47030700 | -3.19132600 | -3.78023600  | L | H | -1 | -5.58986100  | 3.00998100  | -1.70877800 | L |
| H | -1 | -2.95902500 | -3.08587400 | -7.27817400  | L | H | -1 | -3.72541800  | 3.49782700  | -0.12117400 | L |
| H | -1 | 3.01440600  | -5.98226300 | -5.61821400  | L | H | -1 | -9.92836400  | -0.84007600 | 1.65649200  | L |
| H | -1 | 1.88451900  | -8.06180300 | -5.23063400  | L | H | -1 | -12.10199300 | 0.04067500  | 2.12814300  | L |
| H | -1 | 0.89441400  | -7.36511300 | -4.13234000  | L | H | -1 | -11.46102500 | 1.37073700  | 2.82203800  | L |
| H | -1 | 5.60632700  | -4.72590200 | -0.29395400  | L | H | -1 | -6.32579000  | -3.83472400 | -1.58417800 | L |
| H | -1 | 7.32874300  | -4.31766300 | -0.31291200  | L | H | -1 | -5.07397900  | -3.98284300 | -0.32389700 | L |
| H | -1 | 8.40367900  | -5.08850100 | -2.81074800  | L | H | 0  | -5.73380600  | -1.65003800 | -1.42633600 | H |
| H | -1 | 4.45940600  | -3.54284400 | -1.99845600  | L | H | 0  | -7.10283700  | -1.65995300 | -0.29309800 | H |
| H | -1 | 8.23938300  | -4.31525400 | -5.13772900  | L | H | -1 | -6.71921500  | -4.24007000 | 1.45577700  | L |
| H | -1 | 4.29393400  | -2.76364600 | -4.34602400  | L | H | -1 | -6.61552900  | -5.93452800 | -0.68220000 | L |
| H | -1 | 7.07116300  | -3.21436200 | -6.53339000  | L | H | -1 | -8.19271600  | -5.84037100 | -0.30279400 | L |
| H | -1 | 7.94964800  | -6.58048200 | -1.15740000  | L | H | -1 | -8.57882600  | -2.88541000 | -6.36651400 | L |
| H | -1 | 6.05785500  | -6.84795800 | -2.56783500  | L | H | -1 | -8.03150500  | -2.82706300 | -4.68656400 | L |
| H | -1 | 5.05286500  | -7.07588300 | -1.29854900  | L | H | -1 | -6.26345600  | -3.78255600 | -7.03036400 | L |
| H | -1 | 3.42040300  | -2.96157500 | 3.17626100   | L | H | -1 | -5.72661300  | -3.51192400 | -5.37466000 | L |
| H | -1 | 3.34452300  | -1.04746300 | 1.52031700   | L | H | 0  | -6.83335100  | -1.38381700 | -7.34625400 | H |
| H | -1 | 4.99633300  | -0.56903400 | 1.99614900   | L | H | 0  | -5.12832800  | -1.64946100 | -7.00035000 | H |
| H | -1 | 3.67348000  | -0.46075000 | 3.15607400   | L | H | 0  | -7.16272300  | -0.49182600 | -5.18810700 | H |
| H | -1 | 4.13768200  | -3.30137100 | 1.07816400   | L | H | 0  | -3.79664000  | -1.78786200 | -5.19181800 | H |
| H | -1 | 6.37198700  | -2.02410600 | 3.49212000   | L | H | 0  | -3.42785600  | -0.77865800 | -3.78596900 | H |
| H | -1 | 5.04885600  | -4.52003800 | 3.94939000   | L | H | 0  | -6.34790100  | 1.02695500  | -3.67340700 | H |
| H | -1 | 6.62455100  | -4.11825800 | 4.01744600   | L | H | 0  | -4.84961200  | 0.51807500  | -2.79900400 | H |
| H | 0  | 1.51228700  | 3.74618800  | 4.66946900   | H | H | -1 | -8.02760700  | -5.37609500 | -6.45557900 | L |
| H | 0  | 3.26480000  | 4.07149200  | 4.70465900   | H | H | -1 | -10.19809100 | -4.64152400 | -5.87234400 | L |
| H | -1 | 2.70233300  | 2.91564900  | 6.72324100   | L | H | -1 | -9.83714000  | -4.58161800 | -4.28153700 | L |
| H | -1 | 4.27117900  | 1.48552200  | 4.78642000   | L | H | -1 | -5.12090900  | -7.48822300 | 0.45463400  | L |
| H | -1 | 4.56696100  | 1.81007900  | 6.37207600   | L | H | -1 | -5.46075000  | -6.97298700 | 2.11339200  | L |
| H | -1 | 1.67865800  | -2.44082200 | 4.59309300   | L | H | -1 | -2.98700000  | -6.66708500 | -0.70675500 | L |
| H | -1 | -0.29779100 | -3.82364300 | 3.91709100   | L | H | -1 | -4.33110100  | -4.59505100 | 2.99000000  | L |
| H | -1 | -1.39828100 | -2.69400300 | 4.72240300   | L | H | -1 | -1.58162400  | -4.68230400 | -1.08339900 | L |
| H | -1 | -0.23547900 | -3.63748600 | 5.67491600   | L | H | -1 | -3.02743100  | -3.01926900 | 2.63906500  | L |
| H | -1 | 0.57304500  | -2.10379000 | 2.39496300   | L | H | -1 | -0.96019700  | -2.72019200 | -0.26661400 | L |
| H | -1 | -0.54872900 | -0.90665400 | 3.07403500   | L | H | -1 | -2.78595400  | -8.37698800 | 1.44034100  | L |
| H | -1 | 1.18532900  | -0.54150900 | 2.96206200   | L | H | -1 | -4.61334900  | -9.66611300 | 0.61634100  | L |
| H | -1 | -0.47810900 | -0.42996600 | 5.57758100   | L | H | -1 | -5.28756300  | -9.75594300 | 2.09647000  | L |
| H | -1 | 2.32794500  | -0.12630600 | 4.92187000   | L | H | -1 | -5.37015500  | -3.28013900 | 4.96080800  | L |
| H | 0  | 7.04365800  | -1.01339000 | -2.75737700  | H | H | -1 | -3.72607000  | -3.22368700 | 4.32134700  | L |
| H | 0  | 8.07768300  | 0.37320100  | -2.45201500  | H | H | -1 | -4.52564100  | -1.83654100 | 6.95756200  | L |
| H | 0  | 4.90625600  | -0.74830900 | -3.97956600  | H | H | -1 | -2.99970700  | -1.66536500 | 6.09232200  | L |
| H | 0  | 7.56477700  | 2.60618200  | -3.57402200  | H | H | 0  | -5.76639300  | -0.84289400 | 4.97754200  | H |
| H | 0  | 3.09229700  | 0.74814900  | -4.63022400  | H | H | 0  | -4.60702200  | 0.26746200  | 5.73403100  | H |
| H | 0  | 5.71174500  | 4.13082200  | -4.21745400  | H | H | 0  | -4.50733200  | -1.01103100 | 3.05807900  | H |
| H | 0  | 2.39270100  | 3.05656000  | -4.65797100  | H | H | 0  | -3.23795300  | -0.04568800 | 1.54465200  | H |
| H | -1 | 7.90059200  | -1.30508400 | -5.03451900  | L | H | 0  | -1.83534800  | 0.90509100  | 1.96642100  | H |
| H | -1 | 10.27026500 | -1.49943700 | -4.45737100  | L | H | 0  | -2.41639300  | 0.75304500  | 5.44810600  | H |
| H | -1 | 9.89656100  | -1.05129800 | -2.92689000  | L | H | 0  | -1.71578100  | 1.73671200  | 4.18369400  | H |
| H | -1 | 7.16775800  | 8.10657700  | 2.20330600   | L | H | -1 | -3.14015100  | -3.88515300 | 6.87437700  | L |
| H | -1 | 5.51613900  | 8.56818200  | 2.63502300   | L | H | -1 | -3.61718000  | -5.38403900 | 4.53162200  | L |
| H | -1 | 6.54786900  | 9.51139800  | -0.97647300  | L | H | -1 | -2.18978600  | -4.76947700 | 5.68142700  | L |
| H | -1 | 5.53278000  | 7.86459500  | -2.59070100  | L | H | 0  | 0.63084500   | -1.62035700 | -2.79693000 | H |
| H | -1 | 4.63568100  | 6.06565100  | 2.37599800   | L | H | 0  | 0.71335700   | 0.73277000  | -4.35490500 | H |
| H | -1 | 3.27758300  | 4.18931600  | 1.44934500   | L | H | 0  | 2.04458400   | 0.99478300  | -2.44193300 | H |
| H | -1 | 3.83007700  | 5.59545300  | -2.57680800  | L | H | 0  | 2.59551300   | -1.58647300 | -1.33558300 | H |
| H | -1 | 2.90299300  | 3.95496500  | -0.96722300  | L | H | 0  | -1.34309800  | -0.58186200 | -0.79847700 | H |
| H | -1 | 5.88163900  | 10.66084300 | 1.04043600   | L | H | 0  | -0.02348300  | 2.13645600  | -1.24568500 | H |
| H | -1 | 8.65919400  | 9.87576500  | 1.54540300   | L | H | 0  | -0.81772400  | 2.46391700  | 0.68606100  | H |
| H | -1 | 8.16096200  | 11.33039800 | 1.00582900   | L | H | 0  | 1.06549300   | -0.38835800 | 0.06544000  | H |
| H | 0  | -0.26163600 | 4.70178600  | 4.22715400   | H | H | 0  | 1.92112300   | 1.66002300  | 0.90821500  | H |
| H | 0  | -2.62293600 | 4.18648800  | 4.64261300   | H | H | 0  | -2.35324100  | 1.75693200  | -2.46113200 | H |
| H | 0  | -2.99893200 | 4.27496200  | 2.91287300   | H | H | 0  | -2.79378100  | 1.56632600  | -0.73257700 | H |
| H | 0  | -2.55696600 | 5.75423700  | 3.81287600   | H | H | 0  | -3.79858400  | -0.37306900 | -1.17664600 | H |
| H | 0  | 0.18243500  | 2.77049000  | 2.94459500   | H | O | -1 | 7.62349500   | 11.07135000 | 3.72246600  | L |
| H | 0  | 0.61198300  | 4.73570600  | 1.88574600   | H | H | -1 | 8.49554300   | 0.81438300  | -6.10044700 | L |
| H | 0  | 0.47590900  | 7.13256000  | 1.95268000   | H | H | -1 | 7.68969900   | -7.04365100 | 1.24920600  | L |
| H | 0  | -0.77693200 | 7.07263900  | 3.03769400   | H | H | -1 | 1.02063500   | -8.17575000 | 0.55511400  | L |
| H | -1 | -4.71829100 | 7.43502600  | -0.98865700  | L | H | -1 | -2.63024400  | -7.74875800 | 3.80442800  | L |
| H | -1 | -3.61209600 | 8.38116500  | 0.01186400   | L | H | -1 | -10.36655300 | -1.99814600 | 3.76834400  | L |
| H | -1 | -3.42251600 | 7.88329500  | 2.48688700   | L | H | -1 | -10.11595600 | 7.04318200  | -3.29727800 | L |

|   |    |             |             |             |         |   |    |             |             |             |        |
|---|----|-------------|-------------|-------------|---------|---|----|-------------|-------------|-------------|--------|
| H | -1 | 5.61081100  | 11.27249900 | 3.41628100  | L       | C | -1 | 0.63481200  | -1.58867200 | 7.06371000  | L      |
| H | -1 | -1.93164400 | 6.76946400  | -4.90615400 | L       | O | -1 | -0.42025400 | -1.87328500 | 7.68773100  | L      |
| H | -1 | 5.58302000  | -0.80074300 | 5.39984400  | L       | N | -1 | 9.63315700  | -1.19144700 | -3.69098100 | L      |
| H | -1 | 4.25970800  | -7.46715500 | -4.01701700 | L       | C | -1 | 8.53796100  | -0.41896700 | -4.24280100 | L H 55 |
| H | -1 | -6.57058200 | -6.20104100 | -4.67597600 | L       | C | 0  | 7.55325700  | 0.06002600  | -3.17152900 | H      |
| H | -1 | 1.58656100  | -1.91350200 | 7.43595600  | L       | C | 0  | 6.41952200  | 0.94522300  | -3.68930500 | H      |
| H | -1 | -5.87769200 | -5.44938800 | 6.70900500  | L       | C | 0  | 5.16962600  | 0.41180100  | -4.02754200 | H      |
| H | -1 | -9.01745000 | -3.53059000 | -0.62766700 | L       | C | 0  | 4.09019100  | 1.22059000  | -4.38830800 | H      |
| N | -1 | 9.98331700  | 2.17351600  | 2.48415900  | L       | C | 0  | 4.23067600  | 2.61474700  | -4.40039200 | H      |
| C | -1 | 8.62054600  | 1.65912500  | 2.21095100  | L H 371 | O | 0  | 3.21535100  | 3.47011900  | -4.69837200 | H      |
| C | 0  | 8.28946500  | 1.79924600  | 0.71410300  | H       | C | 0  | 5.48301000  | 3.16789300  | -4.08970300 | H      |
| C | 0  | 6.92894800  | 1.28467000  | 0.34315400  | H       | C | 0  | 6.54891700  | 2.34398600  | -3.73644900 | H      |
| N | 0  | 6.76185600  | -0.00130700 | -0.14248500 | H       | C | -1 | 9.02665800  | 0.79380000  | -5.04708200 | L      |
| C | 0  | 5.47654400  | -0.18208500 | -0.44578700 | H       | O | -1 | 9.94199000  | 1.52552000  | -4.58846400 | L      |
| N | 0  | 4.81161300  | 0.94200500  | -0.16538400 | H       | N | -1 | 7.78136000  | 10.54985300 | 1.14571200  | L      |
| C | 0  | 5.69005800  | 1.86788800  | 0.34028200  | H       | C | -1 | 6.48089300  | 10.34124400 | 1.79840100  | L      |
| C | -1 | 8.54541900  | 0.17034800  | 2.65058400  | L       | C | -1 | 6.16132300  | 8.85518800  | 1.94065000  | L      |
| O | -1 | 7.53336700  | -0.24944800 | 3.21040200  | L       | C | -1 | 5.67502900  | 8.26673400  | 0.66016300  | L      |
| N | -1 | 9.56541700  | -0.60716100 | 2.29785700  | L       | C | -1 | 5.87078300  | 8.77440600  | -0.61400300 | L      |
| C | -1 | 9.56341700  | -2.03944400 | 2.51132100  | L H 381 | N | -1 | 5.26436800  | 7.98674000  | -1.53925200 | L      |
| C | 0  | 8.82254800  | -2.81077700 | 1.40005900  | H       | C | -1 | 4.67199800  | 6.91836700  | -0.90128900 | L      |
| C | 0  | 9.37645200  | -2.46562800 | -0.03298300 | H       | C | -1 | 4.92014400  | 7.05660700  | 0.48556300  | L      |
| O | 0  | 10.20286600 | -3.24411900 | -0.51859400 | H       | C | -1 | 4.39014300  | 6.09868800  | 1.36944300  | L      |
| O | 0  | 8.92938700  | -1.37895100 | -0.55122300 | H       | C | -1 | 3.66423900  | 5.04864800  | 0.83582300  | L      |
| C | -1 | 10.96584500 | -2.60860600 | 2.64047800  | L       | C | -1 | 3.45817200  | 4.91552000  | -0.54050900 | L      |
| O | -1 | 11.96456200 | -1.88114000 | 2.40188300  | L       | C | -1 | 3.94372800  | 5.84737500  | -1.43032600 | L      |
| H | 0  | 9.03348500  | 1.25004500  | 0.10310400  | H       | C | -1 | 6.39431000  | 11.07065800 | 3.13607900  | L      |
| H | 0  | 8.34817700  | 2.86667900  | 0.42211800  | H       | N | 0  | -0.47100400 | 6.84057200  | 3.01022200  | H      |
| H | 0  | 5.34709800  | 2.83567900  | 0.68121900  | H       | C | 0  | -0.58514300 | 5.48606000  | 2.48470800  | H      |
| H | 0  | 3.77126800  | 1.04747200  | -0.20292700 | H       | C | 0  | -1.06720300 | 4.52075800  | 3.61237400  | H      |
| H | 0  | 5.01827500  | -1.07690700 | -0.83568000 | H       | O | 0  | -0.72982200 | 3.17221100  | 3.28196000  | H      |
| H | -1 | 7.86254400  | 2.22287000  | 2.81294300  | L       | C | 0  | -2.55417500 | 4.63636600  | 3.95227900  | H      |
| H | -1 | 10.44365000 | 2.46815500  | 1.64782500  | L       | C | 0  | -1.44385700 | 5.26204500  | 1.21672700  | H      |
| H | -1 | 9.93209700  | 2.93946800  | 3.11989800  | L       | O | 0  | -1.62523600 | 4.10827700  | 0.80216300  | H      |
| H | 0  | 8.94275100  | -3.89926200 | 1.56328500  | H       | N | 0  | -1.96537800 | 6.36777200  | 0.64486300  | H      |
| H | 0  | 7.73717500  | -2.58144000 | 1.45511500  | H       | C | -1 | -2.97505900 | 6.36514300  | -0.48416100 | L H 85 |
| H | -1 | 9.02390800  | -2.26373500 | 3.46894700  | L       | C | -1 | -4.10681500 | 7.32675000  | -0.11753600 | L      |
| H | -1 | 10.24200800 | -0.26358200 | 1.64617100  | L       | C | -1 | -4.87897700 | 6.88674600  | 1.13312700  | L      |
| H | -1 | 11.07852100 | -3.66336400 | 2.91862700  | L       | C | -1 | -4.45625000 | 7.25672500  | 2.40204600  | L      |
| H | 0  | 7.58967100  | -0.69185000 | -0.27062200 | H       | C | -1 | -5.14849100 | 6.85859600  | 3.54282500  | L      |

# G1c\_D452A

ON10M: extrapolated energy = -3164.666590 au

|   |    |             |             |             |        |   |    |              |             |             |         |
|---|----|-------------|-------------|-------------|--------|---|----|--------------|-------------|-------------|---------|
| N | -1 | 3.26920900  | -7.53066100 | 2.26792000  | L      | C | -1 | -2.20769900  | 6.81301200  | -1.72700900 | L       |
| C | -1 | 2.08857400  | -6.70324100 | 2.15702400  | L      | O | -1 | -2.26643300  | 7.98756600  | -2.13172100 | L       |
| C | -1 | 2.42860100  | -5.45305100 | 1.30170400  | L H 4  | N | -1 | -1.50084400  | 5.85992200  | -2.33422100 | L       |
| C | 0  | 1.34488800  | -4.41339500 | 1.10313300  | H      | C | -1 | -0.43329600  | 6.14886800  | -3.32637400 | L H 99  |
| C | 0  | 1.72021300  | -3.38378800 | -0.02144400 | H      | C | 0  | 0.51840500   | 4.94907800  | -3.41507100 | H       |
| O | 0  | 2.90610800  | -2.93701300 | -0.04994900 | H      | C | 0  | -0.16226800  | 3.57401000  | -3.68230700 | H       |
| O | 0  | 0.78510100  | -3.02718500 | -0.79607400 | H      | O | 0  | -1.37983000  | 3.44302000  | -3.35391100 | H       |
| C | -1 | 0.97498700  | -7.48828500 | 1.45213200  | L      | O | 0  | 0.60437700   | 2.67421500  | -4.12989700 | H       |
| O | -1 | -0.21019300 | -7.40980600 | 1.86777500  | L      | C | -1 | -0.91777700  | 6.58684300  | -4.69728900 | L       |
| N | -1 | 1.67695400  | -7.12076000 | -4.90846100 | L      | O | -1 | -0.07444100  | 6.72673900  | -5.62075000 | L       |
| C | -1 | 2.67118700  | -6.10494300 | -4.62659200 | L      | N | -1 | -8.96429000  | 5.57864000  | -5.36893500 | L       |
| C | -1 | 2.01947200  | -4.82694600 | -4.05974300 | L      | C | -1 | -8.77750800  | 5.21382600  | -3.95328300 | L       |
| C | -1 | 0.70818000  | -4.39022100 | -4.69260000 | L      | C | -1 | -7.36460200  | 5.54305200  | -3.50004200 | L       |
| C | -1 | 0.54690000  | -4.33586900 | -6.06829900 | L      | C | -1 | -6.32452700  | 4.60457000  | -4.10478800 | L       |
| C | -1 | -0.64793000 | -3.89962500 | -6.63259600 | L      | C | -1 | -4.91937500  | 4.91365600  | -3.67177900 | L       |
| C | -1 | -1.67890000 | -3.47775600 | -5.81103600 | L      | O | -1 | -4.61375500  | 6.02758700  | -3.22603700 | L       |
| O | -1 | -2.87350400 | -3.04142200 | -6.32432700 | L      | N | -1 | -4.03370700  | 3.92219600  | -3.80080100 | L       |
| C | -1 | -1.53421000 | -3.51610100 | -4.43699600 | L      | C | -1 | -9.81829700  | 5.89755200  | -3.06131500 | L       |
| C | -1 | -0.34488100 | -3.96070300 | -3.89113200 | L      | O | -1 | -10.24859100 | 5.31191500  | -2.03396500 | L       |
| C | -1 | 3.62822100  | -6.72064600 | -3.61810800 | L      | N | -1 | -11.28141600 | 0.46829500  | 2.11696600  | L       |
| O | -1 | 3.42686900  | -6.56824000 | -2.38530600 | L      | C | -1 | -10.08218400 | -0.27936500 | 2.46495500  | L       |
| N | -1 | 6.18607100  | -7.01063100 | -1.56517900 | L      | C | -1 | -8.87101300  | 0.63691100  | 2.66057300  | L       |
| C | -1 | 7.07958700  | -6.22133800 | -0.72487700 | L      | C | -1 | -8.25604000  | 1.12473800  | 1.37216200  | L       |
| C | -1 | 6.69707300  | -4.74573000 | -0.77626200 | L      | C | -1 | -8.82410200  | 1.09795000  | 0.12052000  | L       |
| C | -1 | 6.57804700  | -4.22190300 | -2.18380500 | L      | N | -1 | -7.96336100  | 1.67063500  | -0.79395800 | L       |
| C | -1 | 7.62988100  | -4.41514300 | -3.08592700 | L      | C | -1 | -6.83153200  | 2.09254500  | -0.14564700 | L       |
| C | -1 | 7.53875400  | -3.97828600 | -4.38692500 | L      | C | -1 | -6.97538500  | 1.75700700  | 1.21861800  | L       |
| C | -1 | 6.38773900  | -3.35311200 | -4.79852400 | L      | C | -1 | -5.94545800  | 2.06850600  | 2.10418700  | L       |
| O | -1 | 6.34706900  | -2.91805400 | -6.09650100 | L      | C | -1 | -4.80111600  | 2.67067600  | 1.62250600  | L       |
| C | -1 | 5.32484600  | -3.14760400 | -3.94672600 | L      | C | -1 | -4.66698000  | 2.97750700  | 0.23880300  | L       |
| C | -1 | 5.42111600  | -3.58431300 | -2.62986700 | L      | C | -1 | -5.68162800  | 2.70282600  | -0.64459900 | L       |
| C | -1 | 6.95348700  | -6.67936100 | 0.72373700  | L      | C | -1 | -10.40622200 | -1.06114500 | 3.72262300  | L       |
| O | -1 | 5.81541700  | -6.83162700 | 1.23869700  | L      | O | -1 | -10.79536300 | -0.45752900 | 4.75596200  | L       |
| N | -1 | 5.79609700  | -3.71349100 | 4.37431900  | L      | N | -1 | -7.11174900  | -5.75623600 | 0.00396900  | L       |
| C | -1 | 5.49555000  | -2.36346700 | 3.95100500  | L      | C | -1 | -6.97589000  | -4.34716100 | 0.38063600  | L       |
| C | -1 | 4.44876800  | -2.36906200 | 2.86244800  | L      | C | -1 | -5.97047100  | -3.64641600 | -0.54459600 | L H 131 |
| O | -1 | 4.94860400  | -3.14685000 | 1.76578600  | L      | C | 0  | -5.99271000  | -2.12883200 | -0.46530800 | H       |
| C | -1 | 4.13181400  | -0.95451000 | 2.39239900  | L      | C | 0  | -5.11073000  | -1.57262200 | 0.67192500  | H       |
| C | -1 | 5.01235700  | -1.52432200 | 5.14669100  | L      | O | 0  | -5.42539500  | -1.82917700 | 1.85177200  | H       |
| O | -1 | 3.95047200  | -1.83579700 | 5.74581700  | L      | O | 0  | -4.11676200  | -0.85787500 | 0.30612100  | H       |
| N | -1 | 3.87298500  | 1.56496200  | 5.78791600  | L      | C | -1 | -8.33433500  | -3.62380400 | 0.28166400  | L       |
| C | -1 | 2.63425800  | 2.38118900  | 5.84498200  | L H 43 | O | -1 | -8.78963600  | -3.00132900 | 1.27604800  | L       |
| C | 0  | 2.48016600  | 3.31137500  | 4.63955000  | H      | N | -1 | -9.44469000  | -5.14939000 | -5.19133200 | L       |
| C | -1 | 1.40529000  | 1.44475900  | 5.95266400  | L      | C | -1 | -8.03684400  | -4.93307800 | -5.52472400 | L       |
| O | -1 | 0.34438400  | 1.90561300  | 6.40364300  | L      | C | -1 | -7.72890300  | -3.45209300 | -5.67367400 | L       |
| N | -1 | 1.57471400  | 0.18043300  | 5.56987200  | L      | C | -1 | -6.30221000  | -3.21441100 | -6.15266100 | L H 141 |
| C | -1 | 0.55525000  | -0.87142400 | 5.70582000  | L      | C | 0  | -6.02571800  | -1.77940100 | -6.59205100 | H       |
| C | -1 | 0.70888800  | -1.93431900 | 4.58483800  | L      | N | 0  | -6.14983000  | -0.77367400 | -5.53777200 | H       |
| C | -1 | -0.29524000 | -3.05591000 | 4.75512100  | L      | C | 0  | -5.23951100  | -0.54441600 | -4.55252900 | H       |
| C | -1 | 0.50528400  | -1.28540800 | 3.21552600  | L      | N | 0  | -4.03892600  | -1.10928700 | -4.54156500 | H       |

|   |    |             |             |             |   |   |    |              |             |             |   |
|---|----|-------------|-------------|-------------|---|---|----|--------------|-------------|-------------|---|
| N | 0  | -5.57840600 | 0.29645200  | -3.56742800 | H | H | -1 | 8.00160800   | -1.10010400 | -4.95408600 | L |
| C | -1 | -7.15526800 | -5.54932400 | -4.42014800 | L | H | -1 | 10.37076900  | -1.25059400 | -4.36192600 | L |
| O | -1 | -7.33487100 | -5.22496000 | -3.21760800 | L | H | -1 | 9.97878500   | -0.81237200 | -2.83314700 | L |
| N | -1 | -4.20965100 | -9.68515900 | 1.58494100  | L | H | -1 | 7.04395800   | 8.28292400  | 2.29465200  | L |
| C | -1 | -3.59085100 | -8.40731000 | 1.94179200  | L | H | -1 | 5.38114200   | 8.71239400  | 2.71643600  | L |
| C | -1 | -4.46066600 | -7.25228800 | 1.40267100  | L | H | -1 | 6.41807200   | 9.68148800  | -0.88670900 | L |
| C | -1 | -3.65641000 | -5.99270500 | 1.15783500  | L | H | -1 | 5.44479000   | 8.01867400  | -2.51024600 | L |
| C | -1 | -2.83702800 | -5.85861800 | 0.02499700  | L | H | -1 | 4.54994200   | 6.19411100  | 2.44750600  | L |
| C | -1 | -2.06153400 | -4.74149200 | -0.16462600 | L | H | -1 | 3.23363800   | 4.29407200  | 1.50892100  | L |
| C | -1 | -2.08892600 | -3.73362500 | 0.76608400  | L | H | -1 | 3.78533000   | 5.71767700  | -2.51119900 | L |
| O | -1 | -1.32242500 | -2.62438700 | 0.59153800  | L | H | -1 | 2.87913800   | 4.05702900  | -0.91041300 | L |
| C | -1 | -2.88231100 | -3.84252600 | 1.89572500  | L | H | -1 | 5.71719800   | 10.81447300 | 1.12777100  | L |
| C | -1 | -3.67233500 | -4.96453000 | 2.06478200  | L | H | -1 | 8.50581700   | 10.08121800 | 1.64940000  | L |
| C | -1 | -3.35948600 | -8.28147200 | 3.45167600  | L | H | -1 | 7.98360200   | 11.52712700 | 1.10905600  | L |
| O | -1 | -4.19829800 | -8.75958000 | 4.25875500  | L | H | 0  | -0.46946400  | 4.77684500  | 4.49173200  | H |
| N | -1 | -3.18856700 | -5.45407100 | 5.48281100  | L | H | 0  | -2.77737200  | 4.03303400  | 4.83784300  | H |
| C | -1 | -3.85197600 | -4.38754800 | 6.21654200  | L | H | 0  | -3.17475000  | 4.25583000  | 3.12579000  | H |
| C | -1 | -4.23865800 | -3.22405500 | 5.27931800  | L | H | 0  | -2.85703400  | 5.67158700  | 4.16865100  | H |
| C | -1 | -4.04593700 | -1.87944000 | 5.93804700  | L | H | 0  | -1.04048800  | 3.04424900  | 2.36496900  | H |
| C | 0  | -4.65930200 | -0.72407900 | 5.14952300  | H | H | 0  | 0.42550300   | 5.15305100  | 2.22183600  | H |
| N | 0  | -4.04032500 | -0.52355500 | 3.84214000  | H | H | 0  | 0.05453300   | 7.46123400  | 2.40168000  | H |
| C | 0  | -3.01900900 | 0.29020500  | 3.55471300  | H | H | 0  | -1.36723600  | 7.26211400  | 3.24149500  | H |
| N | 0  | -2.38253500 | 0.99570800  | 4.51513900  | H | H | -1 | -4.80641500  | 7.39219100  | -0.97536800 | L |
| N | 0  | -2.68056700 | 0.45884400  | 2.27347000  | H | H | -1 | -3.72481500  | 8.35730000  | 0.03388700  | L |
| C | -1 | -5.04688600 | -4.79983600 | 7.08460200  | L | H | -1 | -3.54179300  | 7.85864600  | 2.50924500  | L |
| O | -1 | -5.18293700 | -4.31659400 | 8.23849000  | L | H | -1 | -6.36189500  | 5.78592400  | 0.03492100  | L |
| C | 0  | 0.64702100  | -0.58617900 | -2.95580800 | H | H | -1 | -4.79104900  | 7.15748500  | 4.53511600  | L |
| O | 0  | 0.88576700  | -0.20898600 | -4.27946700 | H | H | -1 | -7.61739800  | 5.07996900  | 2.02774100  | L |
| C | 0  | 1.71112400  | 0.02854700  | -1.98851100 | H | H | -1 | -7.71613600  | 5.15851800  | 4.24861400  | L |
| O | 0  | 2.86685200  | -0.77752600 | -1.91177000 | H | H | -1 | -3.40607200  | 5.32634300  | -0.59634200 | L |
| O | 0  | -0.72150900 | -0.19183900 | -2.70628600 | H | H | 0  | -1.76485000  | 7.26345100  | 1.08443900  | H |
| C | 0  | -1.16340100 | 0.23287000  | -1.42912000 | H | H | 0  | 1.30040600   | 5.12373400  | -4.17887500 | H |
| C | 0  | -0.13165000 | 1.14547500  | -0.76687100 | H | H | 0  | 1.08574600   | 4.83241500  | -2.46468500 | H |
| O | 0  | -0.55387400 | 1.58663400  | 0.54543200  | H | H | -1 | 0.14411300   | 7.02087200  | -2.92095700 | L |
| C | 0  | 1.16617000  | 0.38376000  | -0.61001200 | H | H | -1 | -1.97093700  | 4.97747500  | -2.47204700 | L |
| O | 0  | 2.12749400  | 1.21899900  | 0.05184900  | H | H | -1 | -7.30870000  | 5.47968000  | -2.39164900 | L |
| C | 0  | -2.47986200 | 0.95132300  | -1.67261200 | H | H | -1 | -7.10356900  | 6.59595100  | -3.74012400 | L |
| O | 0  | -3.51036600 | 0.00821900  | -2.02840600 | H | H | -1 | -6.59839000  | 3.55623200  | -3.84958300 | L |
| H | -1 | 2.78839000  | -5.79420200 | 0.30473000  | L | H | -1 | -6.37374000  | 4.66336100  | -5.21237100 | L |
| H | -1 | 3.30214500  | -4.94933400 | 1.77281300  | L | H | -1 | -4.28738100  | 3.15190500  | -4.37347400 | L |
| H | 0  | 0.36928700  | -4.86898400 | 0.84029500  | H | H | -1 | -3.02341000  | 4.03541800  | -3.65986300 | L |
| H | 0  | 1.17939500  | -3.81296300 | 2.03302200  | H | H | -1 | -8.93127100  | 4.10549300  | -3.89800700 | L |
| H | -1 | 1.76604400  | -6.39571600 | 3.18158200  | L | H | -1 | -9.91123300  | 5.41231500  | -5.63779300 | L |
| H | -1 | 3.60575400  | -7.79402800 | 1.36461300  | L | H | -1 | -8.74240500  | 6.54184700  | -5.51528300 | L |
| H | -1 | 3.97802600  | -7.05909100 | 2.78844800  | L | H | -1 | -8.08648200  | 0.08363300  | 3.21725800  | L |
| H | -1 | 1.84467000  | -4.93106000 | -2.96784500 | L | H | -1 | -9.12682700  | 1.51670500  | 3.28634100  | L |
| H | -1 | 2.74710000  | -3.99055800 | -4.16448400 | L | H | -1 | -9.82260300  | 0.74505000  | -0.15091000 | L |
| H | -1 | 1.36777200  | -4.64581600 | -6.72620700 | L | H | -1 | -8.00042200  | 1.48982200  | -1.76516100 | L |
| H | -1 | -0.24369400 | -3.97316300 | -2.79695600 | L | H | -1 | -6.05527900  | 1.82667200  | 3.16702500  | L |
| H | -1 | -0.74424200 | -3.87327500 | -7.72505600 | L | H | -1 | -3.98607200  | 2.96838800  | 2.30093700  | L |
| H | -1 | -2.33956100 | -3.18463800 | -3.77018700 | L | H | -1 | -5.58933200  | 2.95274300  | -1.70855900 | L |
| H | -1 | -2.80763500 | -3.08215000 | -7.27103600 | L | H | -1 | -3.74473900  | 3.47294100  | -0.10809100 | L |
| H | -1 | 3.20877700  | -5.86790300 | -5.57728500 | L | H | -1 | -9.87571200  | -0.98483600 | 1.62205700  | L |
| H | -1 | 2.11601700  | -7.96916000 | -5.20053000 | L | H | -1 | -12.06863300 | -0.14625200 | 2.08109700  | L |
| H | -1 | 1.10583200  | -7.29332500 | -4.10750300 | L | H | -1 | -11.45746500 | 1.19445500  | 2.78136500  | L |
| H | -1 | 5.74206000  | -4.57229500 | -0.23424100 | L | H | -1 | -6.19623700  | -3.90488300 | -1.60023700 | L |
| H | -1 | 7.45651900  | -4.13148200 | -0.24135400 | L | H | -1 | -4.94999300  | -4.03154600 | -0.33212300 | L |
| H | -1 | 8.56194300  | -4.87732200 | -2.73346700 | L | H | 0  | -5.64566200  | -1.70511500 | -1.42238700 | H |
| H | -1 | 4.58393700  | -3.40809300 | -1.94414300 | L | H | 0  | -7.02000500  | -1.74830400 | -0.29901300 | H |
| H | -1 | 8.39802700  | -4.10312900 | -5.06016000 | L | H | -1 | -6.60149600  | -4.32308800 | 1.43642000  | L |
| H | -1 | 4.41886900  | -2.62793600 | -4.29142300 | L | H | -1 | -6.45194800  | -6.01142000 | -0.70368600 | L |
| H | -1 | 7.21817900  | -3.02203900 | -6.46150700 | L | H | -1 | -8.03304800  | -5.94782800 | -0.33434800 | L |
| H | -1 | 8.12561300  | -6.38061200 | -1.08560500 | L | H | -1 | -8.43598400  | -2.98977600 | -6.39546600 | L |
| H | -1 | 6.24835700  | -6.68131600 | -2.50871400 | L | H | -1 | -7.90070500  | -2.92410600 | -4.71196000 | L |
| H | -1 | 5.23970600  | -6.93051900 | -1.24635000 | L | H | -1 | -6.09980200  | -3.84172100 | -7.04581000 | L |
| H | -1 | 3.50078000  | -2.85593600 | 3.22470100  | L | H | -1 | -5.57886500  | -3.56396000 | -5.38621000 | L |
| H | -1 | 3.39932300  | -0.94062100 | 1.57152100  | L | H | 0  | -6.72394700  | -1.47945700 | -7.39304600 | H |
| H | -1 | 5.03867100  | -0.43186000 | 2.05884700  | L | H | 0  | -5.01568300  | -1.69325700 | -7.03104700 | H |
| H | -1 | 3.70655600  | -0.35073500 | 3.21035900  | L | H | 0  | -7.09824500  | -0.53922100 | -5.27633300 | H |
| H | -1 | 4.23789000  | -3.17830600 | 1.13071100  | L | H | 0  | -3.73453900  | -1.83444300 | -5.19996800 | H |
| H | -1 | 6.43197600  | -1.86331900 | 3.56125000  | L | H | 0  | -3.40665600  | -0.85520800 | -3.76475700 | H |
| H | -1 | 5.15345100  | -4.38467700 | 4.00574200  | L | H | 0  | -6.33930200  | 0.94762300  | -3.70215500 | H |
| H | -1 | 6.72077900  | -3.95325700 | 4.08468000  | L | H | 0  | -4.85450300  | 0.44513000  | -2.81214100 | H |
| H | 0  | 1.56055100  | 3.91574200  | 4.72613200  | H | H | -1 | -7.83711200  | -5.46941300 | -6.48514500 | L |
| H | 0  | 3.33473100  | 4.00984600  | 4.55696200  | H | H | -1 | -10.02483800 | -4.77712400 | -5.91474900 | L |
| H | -1 | 2.64864400  | 3.00023100  | 6.77683100  | L | H | -1 | -9.67534700  | -4.71326400 | -4.32153900 | L |
| H | -1 | 4.25675300  | 1.60356200  | 4.84781300  | L | H | -1 | -4.93551800  | -7.53858400 | 0.44019200  | L |
| H | -1 | 4.53610700  | 1.93080000  | 6.43589500  | L | H | -1 | -5.29574400  | -7.03286800 | 2.09757800  | L |
| H | -1 | 1.74038600  | -2.37081200 | 4.63109400  | L | H | -1 | -2.81010800  | -6.67509500 | -0.70596600 | L |
| H | -1 | -0.20511200 | -3.78958800 | 3.93997900  | L | H | -1 | -4.21702300  | -4.63555400 | 2.98548200  | L |
| H | -1 | -1.33197400 | -2.68244200 | 4.74004200  | L | H | -1 | -1.44019000  | -4.66338300 | -1.07016000 | L |
| H | -1 | -0.15766800 | -3.60545500 | 5.69848000  | L | H | -1 | -2.94120700  | -3.03473900 | 2.64565000  | L |
| H | -1 | 0.64277600  | -2.05081100 | 2.42641700  | L | H | -1 | -0.86132600  | -2.69133200 | -0.24606900 | L |
| H | -1 | -0.50583100 | -0.87635700 | 3.10022000  | L | H | -1 | -2.59054500  | -8.38475400 | 1.43951000  | L |
| H | -1 | 1.22168400  | -0.47824200 | 3.00009700  | L | H | -1 | -4.38783900  | -9.70676100 | 0.60152200  | L |
| H | -1 | -0.46039200 | -0.40293400 | 5.60496800  | L | H | -1 | -5.06975600  | -9.81201100 | 2.07710000  | L |
| H | -1 | 2.34357300  | -0.04501400 | 4.96796100  | L | H | -1 | -5.29347900  | -3.34410700 | 4.95099800  | L |
| H | 0  | 7.12173700  | -0.82717100 | -2.67671600 | H | H | -1 | -3.64667600  | -3.25538300 | 4.32302500  | L |
| H | 0  | 8.10075200  | 0.60541600  | -2.38075600 | H | H | -1 | -4.48935800  | -1.88838100 | 6.95633300  | L |
| H | 0  | 5.00665000  | -0.66594500 | -3.97473000 | H | H | -1 | -2.96139700  | -1.68678300 | 6.10128600  | L |
| H | 0  | 7.50159900  | 2.80020800  | -3.46442600 | H | H | 0  | -5.73077400  | -0.91554300 | 4.95943900  | H |
| H | 0  | 3.13252800  | 0.76192600  | -4.61672400 | H | H | 0  | -4.60411600  | 0.21672300  | 5.73035200  | H |
| H | 0  | 5.58627400  | 4.25113400  | -4.09313300 | H | H | 0  | -4.46835700  | -1.05242700 | 3.04821400  | H |
| H | 0  | 2.32477900  | 3.04906200  | -4.57784500 | H | H | 0  | -3.21919800  | -0.04793800 | 1.54319900  | H |

|                                              |    |              |             |             |         |   |    |              |             |             |         |
|----------------------------------------------|----|--------------|-------------|-------------|---------|---|----|--------------|-------------|-------------|---------|
| H                                            | 0  | -1.76094300  | 0.78908900  | 1.98680900  | H       | C | -1 | 6.48617300   | -4.32545400 | -2.25658800 | L       |
| H                                            | 0  | -2.39940400  | 0.68431500  | 5.47559700  | H       | C | -1 | 7.52850600   | -4.52865800 | -3.16750600 | L       |
| H                                            | 0  | -1.67615200  | 1.68194300  | 4.24060400  | H       | C | -1 | 7.43078900   | -4.09052500 | -4.46759600 | L       |
| H                                            | -1 | -3.06479700  | -3.91024000 | 6.87868100  | L       | C | -1 | 6.28253200   | -3.45402800 | -4.86942500 | L       |
| H                                            | -1 | -3.49823300  | -5.41366200 | 4.53036800  | L       | O | -1 | 6.23527500   | -3.01818600 | -6.16691700 | L       |
| H                                            | -1 | -2.09017900  | -4.77425700 | 5.69042800  | L       | C | -1 | 5.22884000   | -3.23843200 | -4.00873500 | L       |
| H                                            | 0  | 0.72009000   | -1.67546800 | -2.89035000 | H       | C | -1 | 5.33183300   | -3.67647300 | -2.69282800 | L       |
| H                                            | 0  | 0.66602000   | 0.75324200  | -4.32160500 | H       | C | -1 | 6.86187900   | -6.78736900 | 0.64714600  | L       |
| H                                            | 0  | 2.02936400   | 0.97295100  | -2.44432300 | H       | O | -1 | 5.72671600   | -6.92869100 | 1.17155400  | L       |
| H                                            | 0  | 2.70041300   | -1.57578800 | -1.34267700 | H       | N | -1 | 5.76398200   | -3.81149900 | 4.30795400  | L       |
| H                                            | 0  | -1.33240700  | -0.63219100 | -0.76720100 | H       | C | -1 | 5.47309400   | -2.45847600 | 3.88747700  | L       |
| H                                            | 0  | 0.03214200   | 2.02739500  | -1.39362600 | H       | C | -1 | 4.41725700   | -2.45352400 | 2.80769800  | L       |
| H                                            | 0  | -0.96611100  | 2.46119300  | 0.42613300  | H       | O | -1 | 4.90035000   | -3.23578600 | 1.70667700  | L       |
| H                                            | 0  | 0.99444700   | -0.52995200 | -0.02317900 | H       | C | -1 | 4.11020500   | -1.03579800 | 2.34063900  | L       |
| H                                            | 0  | 1.68077800   | 1.53786100  | 0.85415900  | H       | C | -1 | 5.00810500   | -1.61503400 | 5.08735000  | L       |
| H                                            | 0  | -2.34744900  | 1.65906800  | -2.49454200 | H       | O | -1 | 3.94827000   | -1.91632700 | 5.69524900  | L       |
| H                                            | 0  | -2.79824800  | 1.49494700  | -0.77173500 | H       | N | -1 | 3.90431300   | 1.48501400  | 5.73878400  | L       |
| H                                            | 0  | -3.77877600  | -0.45648000 | -1.16115100 | H       | C | -1 | 2.67412600   | 2.31326100  | 5.80637900  | L H 43  |
| O                                            | -1 | 7.43364200   | 11.25305000 | 3.82171500  | L       | C | 0  | 2.48648700   | 3.25307200  | 4.61553700  | H       |
| H                                            | -1 | 8.56315500   | 1.03216700  | -6.01257300 | L       | C | 0  | 2.78477200   | 2.63253900  | 3.23206700  | H       |
| H                                            | -1 | 7.85898100   | -6.85296000 | 1.31848400  | L       | O | 0  | 3.82080700   | 2.91005100  | 2.64518800  | H       |
| H                                            | -1 | 1.21717400   | -8.10987900 | 0.57930100  | L       | C | -1 | 1.43702200   | 1.38882800  | 5.92410200  | L       |
| H                                            | -1 | -2.46200600  | -7.75795400 | 3.80560900  | L       | O | -1 | 0.38446300   | 1.85986300  | 6.38402800  | L       |
| H                                            | -1 | -10.30548400 | -2.15480200 | 3.72907600  | L       | N | -1 | 1.59090600   | 0.12303000  | 5.53961300  | L       |
| H                                            | -1 | -10.18069500 | 6.90237900  | -3.31956400 | L       | C | -1 | 0.56240000   | -0.91887800 | 5.68382300  | L       |
| H                                            | -1 | 5.41952300   | 11.41660500 | 3.50283700  | L       | C | -1 | 0.69630300   | -1.98286900 | 4.56135100  | L       |
| H                                            | -1 | -1.98246700  | 6.78658100  | -4.87584400 | L       | C | -1 | -0.31726100  | -3.09466800 | 4.73975100  | L       |
| H                                            | -1 | 5.60769300   | -0.65855700 | 5.46587700  | L       | C | -1 | 0.48761600   | -1.33157400 | 3.19393800  | L       |
| H                                            | -1 | 4.47164200   | -7.33183500 | -3.97055300 | L       | C | -1 | 0.64629300   | -1.63729400 | 7.04083600  | L       |
| H                                            | -1 | -6.37622000  | -6.26983100 | -4.69753000 | L       | O | -1 | -0.40625300  | -1.91180000 | 7.67357700  | L       |
| H                                            | -1 | 1.61999400   | -1.85045900 | 7.47418300  | L       | N | -1 | 9.55801000   | -1.32446100 | -3.78851400 | L       |
| H                                            | -1 | -5.77108800  | -5.52572800 | 6.69294900  | L       | C | -1 | 8.46583300   | -0.54116500 | -4.33099200 | L H 57  |
| H                                            | -1 | -8.8928400   | -3.65349500 | -0.66067300 | L       | C | 0  | 7.49202100   | -0.06940500 | -3.24614400 | H       |
| N                                            | -1 | 9.96955500   | 2.40373300  | 2.58376100  | L       | C | 0  | 6.36655700   | 0.83862200  | -3.73830300 | H       |
| C                                            | -1 | 8.61853800   | 1.86413900  | 2.30086700  | L H 368 | C | 0  | 5.09489700   | 0.33963300  | -4.05122400 | H       |
| C                                            | 0  | 8.28693600   | 2.01652100  | 0.80107400  | H       | C | 0  | 4.03324400   | 1.17937600  | -4.39729200 | H       |
| C                                            | 0  | 7.00135600   | 1.36508700  | 0.37197500  | H       | C | 0  | 4.21653300   | 2.57065700  | -4.42242600 | H       |
| N                                            | 0  | 6.95197200   | 0.02221000  | 0.03864400  | H       | O | 0  | 3.23193900   | 3.45346800  | -4.71800900 | H       |
| C                                            | 0  | 5.70247700   | -0.22009000 | -0.33420400 | H       | C | 0  | 5.48979500   | 3.08589700  | -4.12915900 | H       |
| N                                            | 0  | 4.95195700   | 0.89926600  | -0.26325100 | H       | C | 0  | 6.53490700   | 2.23303100  | -3.78934000 | H       |
| C                                            | 0  | 5.75561500   | 1.91673400  | 0.18817800  | H       | C | -1 | 8.95960700   | 0.66703100  | -5.13904200 | L       |
| C                                            | -1 | 8.56882700   | 0.37340900  | 2.73750300  | L       | O | -1 | 9.88582800   | 1.38964700  | -4.68791300 | L       |
| O                                            | -1 | 7.56131600   | -0.06648300 | 3.29004600  | L       | N | -1 | 7.86125800   | 10.43282000 | 1.06619900  | L       |
| N                                            | -1 | 9.60561800   | -0.38401000 | 2.39008100  | L       | C | -1 | 6.56431100   | 10.23669700 | 1.72967400  | L       |
| C                                            | -1 | 9.62937700   | -1.81645500 | 2.60112300  | L H 218 | C | -1 | 6.23145900   | 8.75378400  | 1.87424100  | L       |
| C                                            | 0  | 8.87943700   | -2.61228600 | 1.51357900  | H       | C | -1 | 5.72877800   | 8.17050200  | 0.59772200  | L       |
| C                                            | 0  | 9.53830000   | -2.45190500 | 0.12745700  | H       | C | -1 | 5.91883300   | 8.67664100  | -0.67791600 | L       |
| O                                            | 0  | 10.39496400  | -3.22132500 | -0.25859900 | H       | N | -1 | 5.29706300   | 7.89521600  | -1.59825200 | L       |
| O                                            | 0  | 9.14724500   | -1.40522000 | -0.59364900 | H       | C | -1 | 4.69964600   | 6.83247000  | -0.95561500 | L       |
| C                                            | -1 | 11.04147700  | -2.35919400 | 2.73840500  | L       | C | -1 | 4.96069500   | 6.96784900  | 0.42914900  | L       |
| O                                            | -1 | 12.02774900  | -1.61251800 | 2.50750800  | L       | C | -1 | 4.42877100   | 6.01486600  | 1.31720100  | L       |
| H                                            | 0  | 9.10532500   | 1.59334800  | 0.18235500  | H       | C | -1 | 3.68823300   | 4.97212100  | 0.78941500  | L       |
| H                                            | 0  | 8.23513500   | 3.09545500  | 0.55334300  | H       | C | -1 | 3.46939000   | 4.84144800  | -0.58518200 | L       |
| H                                            | 0  | 5.37957500   | 2.92598200  | 0.31392800  | H       | C | -1 | 3.95657400   | 5.76879700  | -1.47880200 | L       |
| H                                            | 0  | 3.94158900   | 0.93042100  | -0.41445300 | H       | C | -1 | 6.49601400   | 10.96650200 | 3.06819800  | L       |
| H                                            | 0  | 5.29209100   | -1.17249800 | -0.64012400 | H       | N | 0  | -0.08750600  | 6.62884300  | 2.75574600  | H       |
| H                                            | -1 | 7.84615300   | 2.41234200  | 2.89888700  | L       | C | 0  | -0.37322900  | 5.29321300  | 2.23856600  | H       |
| H                                            | -1 | 10.42959900  | 2.70855400  | 1.75092700  | L       | C | 0  | -0.94403800  | 4.42831100  | 3.40397500  | L       |
| H                                            | -1 | 9.89973200   | 3.16743700  | 3.22044600  | L       | O | 0  | -0.83596200  | 3.03682900  | 3.12864700  | H       |
| H                                            | 0  | 8.90946100   | -3.68907900 | 1.75928900  | H       | C | 0  | -2.41154500  | 4.68125600  | 3.73069500  | H       |
| H                                            | 0  | 7.81564400   | -2.29777700 | 1.48470000  | H       | C | 0  | -1.26401000  | 5.16762500  | 0.98456500  | H       |
| H                                            | -1 | 9.08805600   | -2.05265100 | 3.55485500  | L       | O | 0  | -1.34724600  | 4.09827100  | 0.37600800  | H       |
| H                                            | -1 | 10.27976500  | -0.02650600 | 1.74337400  | L       | N | 0  | -1.93779600  | 6.29556100  | 0.64240100  | H       |
| H                                            | -1 | 11.17232100  | -3.41212900 | 3.01550500  | L       | C | -1 | -2.94869200  | 6.35371200  | -0.47479100 | L H 87  |
| H                                            | 0  | 8.31124100   | -0.93598600 | -0.25058000 | H       | C | -1 | -4.06792000  | 7.32619400  | -0.09850000 | L       |
| H                                            | 0  | 2.41016600   | 2.75325700  | 3.68729400  | H       | C | -1 | -4.83387100  | 6.89335000  | 1.15846300  | L       |
| G1c_D452N                                    |    |              |             |             |         |   |    |              |             |             |         |
| ONIOM: extrapolated energy = -3333.362694 au |    |              |             |             |         |   |    |              |             |             |         |
| N                                            | -1 | 3.18248900   | -7.60318400 | 2.22183800  | L       | C | -1 | -6.68137300  | 5.72870100  | 2.19926100  | L       |
| C                                            | -1 | 2.00909400   | -6.76425600 | 2.12099400  | L       | C | -1 | -5.97441800  | 6.12238900  | 1.06080900  | L       |
| C                                            | -1 | 2.35416000   | -5.51716500 | 1.26314700  | L H 4   | C | -1 | -2.18740200  | 6.79446800  | -1.72389100 | L       |
| C                                            | 0  | 1.25576400   | -4.48573500 | 1.10075200  | H       | O | -1 | -2.23805500  | 7.96966600  | -2.12782800 | L       |
| C                                            | 0  | 1.62385500   | -3.40490100 | 0.03210800  | H       | N | -1 | -1.49496900  | 5.83472100  | -2.33720500 | L       |
| O                                            | 0  | 2.73254500   | -2.80939000 | 0.14643800  | H       | C | -1 | -0.43297300  | 6.11355400  | -3.33817200 | L H 101 |
| O                                            | 0  | 0.74612200   | -3.16005100 | -0.85581600 | H       | C | 0  | 0.48297300   | 4.88651300  | -3.44062200 | H       |
| C                                            | -1 | 0.88206100   | -7.53818200 | 1.42524200  | L       | C | 0  | -0.16427400  | 3.56479500  | -3.97751600 | H       |
| O                                            | -1 | -0.29878700  | -7.44828000 | 1.85078400  | L       | O | 0  | -1.40697000  | 3.46323500  | -4.09855000 | H       |
| N                                            | -1 | 1.53446800   | -7.17552400 | -4.94090400 | L       | O | 0  | 0.68975600   | 2.64958000  | -4.21977300 | H       |
| C                                            | -1 | 2.54087900   | -6.16953900 | -4.66711000 | L       | C | -1 | -0.92458400  | 6.55666400  | -4.70489100 | L       |
| C                                            | -1 | 1.90641500   | -4.88542600 | -4.09454300 | L       | O | -1 | -0.08766000  | 6.68861900  | -5.63532800 | L       |
| C                                            | -1 | 0.59420900   | -4.43573600 | -4.71632800 | L       | N | -1 | -8.98587400  | 5.62718500  | -5.30956900 | L       |
| C                                            | -1 | 0.42199000   | -4.37938100 | -6.09062000 | L       | C | -1 | -8.79085100  | 5.26012300  | -3.89561000 | L       |
| C                                            | -1 | -0.77319600  | -3.93133000 | -6.64482100 | L       | C | -1 | -7.37106700  | 5.57541300  | -3.45410500 | L       |
| C                                            | -1 | -1.79310800  | -3.49968500 | -5.81458400 | L       | C | -1 | -6.34527900  | 4.62702300  | -4.06773100 | L       |
| O                                            | -1 | -2.98764200  | -3.05156200 | -6.31778000 | L       | C | -1 | -4.93361300  | 4.92225600  | -3.64639600 | L       |
| C                                            | -1 | -1.63733700  | -3.53987000 | -4.44180800 | L       | O | -1 | -4.61343300  | 6.03301300  | -3.20296200 | L       |
| C                                            | -1 | -0.44789200  | -3.99621700 | -3.90599600 | L       | N | -1 | -4.05876600  | 3.92225500  | -3.78304700 | L       |
| C                                            | -1 | 3.50024600   | -6.79486200 | -3.66679400 | L       | C | -1 | -9.81744000  | 5.95368600  | -2.99482500 | L       |
| O                                            | -1 | 3.31068600   | -6.64088700 | -2.43231900 | L       | O | -1 | -10.24483600 | 5.37195100  | -1.96405500 | L       |
| N                                            | -1 | 6.07219100   | -7.11042100 | -1.63536000 | L       | N | -1 | -11.29017500 | 0.53733000  | 2.19422900  | L       |
| C                                            | -1 | 6.98034600   | -6.33014200 | -0.80236300 | L       | C | -1 | -10.09543100 | -0.22209800 | 2.53202000  | L       |
| C                                            | -1 | 6.61182700   | -4.85085900 | -0.85021000 | L       | C | -1 | -8.87379000  | 0.68226200  | 2.71773200  | L       |

|   |    |              |             |             |   |   |    |              |             |             |   |
|---|----|--------------|-------------|-------------|---|---|----|--------------|-------------|-------------|---|
| C | -1 | -8.26486300  | 1.16447400  | 1.42434600  | L | H | -1 | 3.37105900   | -1.01450800 | 1.52590800  | L |
| C | -1 | -8.84358500  | 1.14361900  | 0.17748300  | L | H | -1 | 5.01930200   | -0.52191100 | 1.99964900  | L |
| N | -1 | -7.98496100  | 1.70817000  | -0.74401600 | L | H | -1 | 3.69769800   | -0.42816100 | 3.16226100  | L |
| C | -1 | -6.84370000  | 2.11881900  | -0.10507900 | L | H | -1 | 4.18399500   | -3.26013900 | 1.07765000  | L |
| C | -1 | -6.97942800  | 1.78427200  | 1.26026200  | L | H | -1 | 6.41106800   | -1.96736000 | 3.49003400  | L |
| C | -1 | -5.93915600  | 2.08543300  | 2.13727300  | L | H | -1 | 5.11176500   | -4.47627100 | 3.94459900  | L |
| C | -1 | -4.79305200  | 2.67656800  | 1.64619100  | L | H | -1 | 6.68383200   | -4.06018000 | 4.01054900  | L |
| C | -1 | -4.66748600  | 2.98251100  | 0.26149200  | L | H | 0  | 1.45589600   | 3.65443500  | 4.63101500  | H |
| C | -1 | -5.69210200  | 2.71801500  | -0.61347200 | L | H | 0  | 3.17863100   | 4.10835800  | 4.69199300  | H |
| C | -1 | -10.41657000 | -1.00107600 | 3.79216800  | L | H | -1 | 2.70232400   | 2.93184200  | 6.73822000  | L |
| O | -1 | -10.79116800 | -0.39401800 | 4.82886000  | L | H | -1 | 4.28057900   | 1.52016300  | 4.79551800  | L |
| N | -1 | -7.19920100  | -5.72690300 | 0.04504700  | L | H | -1 | 4.57635500   | 1.84416400  | 6.38128900  | L |
| C | -1 | -7.04646600  | -4.31933800 | 0.42089500  | L | H | -1 | 1.72384400   | -2.42941500 | 4.59889200  | L |
| C | -1 | -6.04202000  | -3.62814000 | -0.51253800 | L | H | -1 | -0.24110000  | -3.82893400 | 3.92371300  | L |
| C | 0  | -6.03996600  | -2.10899400 | -0.45122400 | H | H | -1 | -1.35039200  | -2.71110300 | 4.73341500  | L |
| C | 0  | -5.16257700  | -1.54188400 | 0.68508300  | H | H | -1 | -0.17718800  | -3.64582400 | 5.68180100  | L |
| O | 0  | -5.42044900  | -1.87190900 | 1.86165800  | H | H | -1 | 0.61104600   | -2.09803400 | 2.40353000  | L |
| O | 0  | -4.23569800  | -0.74362300 | 0.32047300  | H | H | -1 | -0.52038800  | -0.91264600 | 3.08717200  | L |
| C | -1 | -8.39856900  | -3.58273700 | 0.33343600  | L | H | -1 | 1.21003200   | -0.53136500 | 2.97272200  | L |
| O | -1 | -8.83946200  | -2.95616400 | 1.33173100  | L | H | -1 | -0.44943000  | -0.44047400 | 5.59156400  | L |
| N | -1 | -9.56936800  | -5.09322400 | -5.13045300 | L | H | -1 | 2.35247900   | -0.10971500 | 4.93125200  | L |
| C | -1 | -8.16233400  | -4.89302800 | -5.47553800 | L | H | 0  | 7.05555900   | -0.96123800 | -2.76321900 | H |
| C | -1 | -7.84121700  | -3.41506900 | -5.62671000 | L | H | 0  | 8.05042300   | 0.45577300  | -2.44980900 | H |
| C | -1 | -6.41632000  | -3.19115900 | -6.11753500 | L | H | 0  | 4.90402800   | -0.73406300 | -4.00091600 | H |
| C | 0  | -6.11316300  | -1.75818200 | -6.54213800 | H | H | 0  | 7.50499600   | 2.66120200  | -3.53414300 | H |
| N | 0  | -6.16783900  | -0.77721200 | -5.46162800 | H | H | 0  | 3.06090400   | 0.75245600  | -4.62690600 | H |
| C | 0  | -5.15562200  | -0.34765000 | -4.66036800 | H | H | 0  | 5.62427900   | 4.16546800  | -4.13982500 | H |
| N | 0  | -3.91632600  | -0.82659600 | -4.75467800 | H | H | 0  | 2.32531400   | 3.05307500  | -4.60143900 | H |
| N | 0  | -5.42639600  | 0.62302700  | -3.78773600 | H | H | -1 | 7.91694500   | -1.21681700 | -5.03793200 | L |
| C | -1 | -7.27762300  | -5.51818700 | -4.37850400 | L | H | -1 | 10.28938500  | -1.39058800 | -4.46560800 | L |
| O | -1 | -7.44401100  | -5.19246500 | -3.17443100 | L | H | -1 | 9.91446700   | -0.94904400 | -2.93350800 | L |
| N | -1 | -4.32246900  | -9.68443500 | 1.60082200  | L | H | -1 | 7.11139400   | 8.17282900  | 2.22072900  | L |
| C | -1 | -3.68827800  | -8.41279300 | 1.95279100  | L | H | -1 | 5.45642400   | 8.61836100  | 2.65648100  | L |
| C | -1 | -4.55125500  | -7.24917500 | 1.42121900  | L | H | -1 | 6.47264900   | 9.57842900  | -0.95497100 | L |
| C | -1 | -3.73682300  | -5.99741800 | 1.16997000  | L | H | -1 | 5.46967800   | 7.92569400  | -2.57071200 | L |
| C | -1 | -2.92565500  | -5.87097200 | 0.03036200  | L | H | -1 | 4.59848600   | 6.10838800  | 2.39391400  | L |
| C | -1 | -2.14091200  | -4.76140200 | -0.16546900 | L | H | -1 | 3.25592400   | 4.22157100  | 1.46591000  | L |
| C | -1 | -2.15070200  | -3.75360900 | 0.76567200  | L | H | -1 | 3.78790300   | 5.64099000  | -2.55834400 | L |
| O | -1 | -1.37490500  | -2.65184700 | 0.58498900  | L | H | -1 | 2.87894900   | 3.98875400  | -0.95043500 | L |
| C | -1 | -2.93565700  | -3.85512100 | 1.90187100  | L | H | -1 | 5.79969700   | 10.71756200 | 1.06555400  | L |
| C | -1 | -3.73514900  | -4.96942000 | 2.07725700  | L | H | -1 | 8.58528700   | 9.95698500  | 1.56371300  | L |
| C | -1 | -3.44310300  | -8.28969100 | 3.46072000  | L | H | -1 | 8.07271000   | 11.40808700 | 1.02808300  | L |
| O | -1 | -4.27977400  | -8.75984900 | 4.27466300  | L | H | 0  | -0.32845800  | 4.70036500  | 4.27456600  | H |
| N | -1 | -3.22766800  | -5.46472900 | 5.49101400  | L | H | 0  | -2.68332900  | 4.15051500  | 4.64921100  | H |
| C | -1 | -3.87449500  | -4.39201700 | 6.23050600  | L | H | 0  | -3.05159300  | 4.29897300  | 2.92155300  | H |
| C | -1 | -4.25761900  | -3.22451400 | 5.29681300  | L | H | 0  | -2.63221700  | 5.74650200  | 3.88413200  | H |
| C | -1 | -4.04629900  | -1.88204600 | 5.95422700  | L | H | 0  | 0.05067100   | 2.83054900  | 2.75924400  | H |
| C | 0  | -4.66784000  | -0.72584200 | 5.17227400  | H | H | 0  | 0.59002600   | 4.85276200  | 1.95215400  | H |
| N | 0  | -4.07132300  | -0.52816800 | 3.85670400  | H | H | 0  | 0.36812800   | 7.22224600  | 2.06809900  | H |
| C | 0  | -3.04985500  | 0.28367600  | 3.55353200  | H | H | 0  | -0.91039400  | 7.10351200  | 3.11953300  | H |
| N | 0  | -2.41219500  | 1.00304800  | 4.50399200  | H | H | -1 | -4.77398200  | 7.39872600  | -0.95044700 | L |
| N | 0  | -2.69548900  | 0.40693300  | 2.27795100  | H | H | -1 | -3.67463500  | 8.35292500  | 0.04996700  | L |
| C | -1 | -5.06608300  | -4.79290500 | 7.10841600  | L | H | -1 | -3.47583100  | 7.85173200  | 2.52359500  | L |
| O | -1 | -5.18777900  | -4.30872200 | 8.26351200  | L | H | -1 | -6.33656900  | 5.80738600  | 0.07242100  | L |
| C | 0  | 0.09555400   | -0.49277300 | -3.24536200 | H | H | -1 | -4.71491600  | 7.16215100  | 4.55966300  | L |
| O | 0  | 0.32083800   | -0.10110000 | -4.55589900 | H | H | -1 | -7.58222200  | 5.11308200  | 2.07548900  | L |
| C | 0  | 1.30202900   | -0.19162000 | -2.31057100 | H | H | -1 | -7.66165100  | 5.19189400  | 4.29712700  | L |
| O | 0  | 2.27072100   | -1.21152600 | -2.43595900 | H | H | -1 | -3.39074800  | 5.31920400  | -0.58360100 | L |
| O | 0  | -1.13534900  | 0.15005400  | -2.85021100 | H | H | 0  | -1.77780400  | 7.14306700  | 1.17997900  | H |
| C | 0  | -1.38489100  | 0.48748700  | -1.49167300 | H | H | 0  | 1.35891100   | 5.11675700  | -4.07867600 | H |
| C | 0  | -0.15766000  | 1.10579200  | -0.78325800 | H | H | 0  | 0.92631600   | 4.64403000  | -2.44992500 | H |
| O | 0  | -0.47616100  | 1.44834400  | 0.57357400  | H | H | -1 | 0.15627700   | 6.97975900  | -2.93738600 | L |
| C | 0  | 0.90269200   | 0.02122600  | -0.84259600 | H | H | -1 | -1.97478300  | 4.95694400  | -2.47130800 | L |
| O | 0  | 2.06630900   | 0.32277200  | -0.04645700 | H | H | -1 | -7.30653600  | 5.51115100  | -2.34623100 | L |
| C | 0  | -2.59651800  | 1.39604600  | -1.54944700 | H | H | -1 | -7.10178900  | 6.62579100  | -3.69611300 | L |
| O | 0  | -3.75441700  | 0.60579300  | -1.85682100 | H | H | -1 | -6.62721400  | 3.58132500  | -3.81049200 | L |
| H | -1 | 2.70226000   | -5.86150700 | 0.26313400  | L | H | -1 | -6.40315900  | 4.68663800  | -5.17485100 | L |
| H | -1 | 3.23646700   | -5.02214900 | 1.72707800  | L | H | -1 | -4.32471200  | 3.15464400  | -4.35375100 | L |
| H | 0  | 0.29080900   | -4.94931100 | 0.81495900  | H | H | -1 | -3.04627100  | 4.02556100  | -3.65050800 | L |
| H | 0  | 1.08671100   | -3.92986900 | 2.05553300  | H | H | -1 | -8.95495000  | 4.15332500  | -3.83930900 | L |
| H | -1 | 1.69814400   | -6.45392300 | 3.14828100  | L | H | -1 | -9.93660500  | 5.47018700  | -5.57054900 | L |
| H | -1 | 3.50889800   | -7.86953800 | 1.31569100  | L | H | -1 | -8.75583400  | 6.58822900  | -5.45754000 | L |
| H | -1 | 3.90019100   | -7.13871300 | 2.73653900  | L | H | -1 | -8.09007400  | 0.12118500  | 3.26771900  | L |
| H | -1 | 1.73972500   | -4.98817300 | -3.00124700 | L | H | -1 | -9.11577800  | 1.56431300  | 3.34581800  | L |
| H | -1 | 2.64126600   | -4.05614000 | -4.20516100 | L | H | -1 | -9.84771200  | 0.80055800  | -0.08568200 | L |
| H | -1 | 1.23428000   | -4.69711300 | -6.75543100 | L | H | -1 | -8.03188900  | 1.52803200  | -1.71491800 | L |
| H | -1 | -0.33769000  | -4.01001600 | -2.81270500 | L | H | -1 | -6.04245600  | 1.84434900  | 3.20093500  | L |
| H | -1 | -0.87836100  | -3.90369900 | -7.73643200 | L | H | -1 | -3.96951600  | 2.96610500  | 2.31787200  | L |
| H | -1 | -2.43382400  | -3.20077900 | -3.76822200 | L | H | -1 | -5.60625600  | 2.96735300  | -1.67810800 | L |
| H | -1 | -2.93007800  | -3.09263300 | -7.26501700 | L | H | -1 | -3.74338200  | 3.46903500  | -0.09297600 | L |
| H | -1 | 3.07280200   | -5.93745500 | -5.62220300 | L | H | -1 | -9.90289200  | -0.92928400 | 1.68726400  | L |
| H | -1 | 1.96278200   | -8.02807400 | -5.23682600 | L | H | -1 | -12.08362100 | -0.06950000 | 2.16479100  | L |
| H | -1 | 0.96839500   | -7.34276300 | -4.13524600 | L | H | -1 | -11.45358200 | 1.26496300  | 2.86024300  | L |
| H | -1 | 5.66310800   | -4.66828900 | -0.30019400 | L | H | -1 | -6.27909400  | -3.88406200 | -1.56631600 | L |
| H | -1 | 7.38166600   | -4.24421300 | -0.32151800 | L | H | -1 | -5.02360600  | -4.02326900 | -0.30868100 | L |
| H | -1 | 8.45892400   | -5.00001500 | -2.82294600 | L | H | 0  | -5.66645200  | -1.70005900 | -1.40627400 | H |
| H | -1 | 4.50217800   | -3.49231600 | -2.00011200 | L | H | 0  | -7.06500800  | -1.71190500 | -0.30596600 | H |
| H | -1 | 8.28315500   | -4.22353000 | -5.14801000 | L | H | -1 | -6.66305600  | -4.29924800 | 1.47352100  | L |
| H | -1 | 4.32512900   | -2.70984500 | -4.34573600 | L | H | -1 | -6.54785000  | -5.98828700 | -0.66815100 | L |
| H | -1 | 7.10225300   | -3.13054600 | -6.53920600 | L | H | -1 | -8.12511700  | -5.90939500 | -0.28561100 | L |
| H | -1 | 8.02172100   | -6.49949600 | -1.17184900 | L | H | -1 | -8.54975400  | -2.94565300 | -6.34246500 | L |
| H | -1 | 6.12981000   | -6.78143300 | -2.57930500 | L | H | -1 | -7.99982800  | -2.88573400 | -4.66342100 | L |
| H | -1 | 5.12934700   | -7.02118400 | -1.30862200 | L | H | -1 | -6.22750400  | -3.82013500 | -7.01248900 | L |
| H | -1 | 3.46762300   | -2.93124100 | 3.17773900  | L | H | -1 | -5.69004800  | -3.54798800 | -5.35723200 | L |

|                                                    |    |              |             |             |   |   |            |            |            |   |
|----------------------------------------------------|----|--------------|-------------|-------------|---|---|------------|------------|------------|---|
| H                                                  | 0  | -6.83047400  | -1.42620200 | -7.31483900 | H | 0 | 2.00586800 | 1.47883800 | 1.71067800 | H |
| H                                                  | 0  | -5.11613700  | -1.69180500 | -7.01170500 | H | 0 | 1.22360800 | 1.26183300 | 3.19207700 | H |
| H                                                  | 0  | -7.09136200  | -0.56537400 | -5.11072800 | H |   |            |            |            |   |
| H                                                  | 0  | -3.67258900  | -1.67050800 | -5.28407300 | H |   |            |            |            |   |
| H                                                  | 0  | -3.17424900  | -0.42442800 | -4.17103700 | H |   |            |            |            |   |
| H                                                  | 0  | -6.32971200  | 1.07552200  | -3.81734200 | H |   |            |            |            |   |
| H                                                  | 0  | -4.76946100  | 0.78253800  | -2.95497000 | H |   |            |            |            |   |
| H                                                  | -1 | -7.97586700  | -5.43098300 | -6.43771800 | L |   |            |            |            |   |
| H                                                  | -1 | -10.15189900 | -4.71757200 | -5.84891600 | L |   |            |            |            |   |
| H                                                  | -1 | -9.78851700  | -4.65762300 | -4.25866400 | L |   |            |            |            |   |
| H                                                  | -1 | -5.03689400  | -7.53052500 | 0.46267200  | L |   |            |            |            |   |
| H                                                  | -1 | -5.37832400  | -7.02184000 | 2.12312500  | L |   |            |            |            |   |
| H                                                  | -1 | -2.91280300  | -6.68744300 | -0.70099000 | L |   |            |            |            |   |
| H                                                  | -1 | -4.26889900  | -4.63543800 | 3.00254900  | L |   |            |            |            |   |
| H                                                  | -1 | -1.52641500  | -4.68907200 | -1.07614200 | L |   |            |            |            |   |
| H                                                  | -1 | -2.98041000  | -3.04703400 | 2.65244900  | L |   |            |            |            |   |
| H                                                  | -1 | -0.92148200  | -2.72300900 | -0.25645400 | L |   |            |            |            |   |
| H                                                  | -1 | -2.69202700  | -8.39983600 | 1.44218000  | L |   |            |            |            |   |
| H                                                  | -1 | -4.50906200  | -9.70399000 | 0.61892000  | L |   |            |            |            |   |
| H                                                  | -1 | -5.17963400  | -9.80304800 | 2.10011500  | L |   |            |            |            |   |
| H                                                  | -1 | -5.31626500  | -3.33417200 | 4.97728400  | L |   |            |            |            |   |
| H                                                  | -1 | -3.67397300  | -3.26131400 | 4.33560400  | L |   |            |            |            |   |
| H                                                  | -1 | -4.48127600  | -1.88698800 | 6.97617300  | L |   |            |            |            |   |
| H                                                  | -1 | -2.95860800  | -1.70003100 | 6.10844400  | L |   |            |            |            |   |
| H                                                  | 0  | -5.74335700  | -0.91525400 | 5.00233800  | H |   |            |            |            |   |
| H                                                  | 0  | -4.60499800  | 0.21506200  | 5.75252400  | H |   |            |            |            |   |
| H                                                  | 0  | -4.49816700  | -1.06798500 | 3.06982600  | H |   |            |            |            |   |
| H                                                  | 0  | -3.26859600  | -0.05523500 | 1.54278700  | H |   |            |            |            |   |
| H                                                  | 0  | -1.83635800  | 0.86114100  | 1.97420200  | H |   |            |            |            |   |
| H                                                  | 0  | -2.47412600  | 0.74762100  | 5.47742700  | H |   |            |            |            |   |
| H                                                  | 0  | -1.73636500  | 1.70909000  | 4.20975300  | H |   |            |            |            |   |
| H                                                  | -1 | -3.07719900  | -3.92261600 | 6.88616100  | L |   |            |            |            |   |
| H                                                  | -1 | -3.54486300  | -5.42100300 | 4.54119900  | L |   |            |            |            |   |
| H                                                  | -1 | -2.12100700  | -4.79572300 | 5.68961100  | L |   |            |            |            |   |
| H                                                  | 0  | -0.05902500  | -1.58235100 | -3.24651400 | H |   |            |            |            |   |
| H                                                  | 0  | 0.35630300   | 0.89352700  | -4.54364100 | H |   |            |            |            |   |
| H                                                  | 0  | 1.76678100   | 0.73359900  | -2.66726500 | H |   |            |            |            |   |
| H                                                  | 0  | 1.91540800   | -1.99410300 | -1.95021900 | H |   |            |            |            |   |
| H                                                  | 0  | -1.65894800  | -0.41240500 | -0.91312800 | H |   |            |            |            |   |
| H                                                  | 0  | 0.17673100   | 2.00375000  | -1.31744300 | H |   |            |            |            |   |
| H                                                  | 0  | -0.76163600  | 2.38570700  | 0.57602500  | H |   |            |            |            |   |
| H                                                  | 0  | 0.47348500   | -0.90426800 | -0.44728200 | H |   |            |            |            |   |
| H                                                  | 0  | 2.47074900   | -0.56345000 | 0.12106900  | H |   |            |            |            |   |
| H                                                  | 0  | -2.45720400  | 2.12113700  | -2.35584800 | H |   |            |            |            |   |
| H                                                  | 0  | -2.75004700  | 1.93682700  | -0.60311900 | H |   |            |            |            |   |
| H                                                  | 0  | -4.00769000  | 0.05792700  | -1.04889500 | H |   |            |            |            |   |
| O                                                  | -1 | 7.54276100   | 11.13853400 | 3.74517600  | L |   |            |            |            |   |
| H                                                  | -1 | 8.49040900   | 0.91020900  | -6.10057500 | L |   |            |            |            |   |
| H                                                  | -1 | 7.77056800   | -6.96997600 | 1.23427300  | L |   |            |            |            |   |
| H                                                  | -1 | 1.11088000   | -8.16183500 | 0.55027500  | L |   |            |            |            |   |
| H                                                  | -1 | -2.53763600  | -7.77506100 | 3.80726900  | L |   |            |            |            |   |
| H                                                  | -1 | -10.32645500 | -2.09566500 | 3.79752500  | L |   |            |            |            |   |
| H                                                  | -1 | -10.17216300 | 6.96208000  | -3.24980600 | L |   |            |            |            |   |
| H                                                  | -1 | 5.52774300   | 11.32182300 | 3.44316200  | L |   |            |            |            |   |
| H                                                  | -1 | -1.98872800  | 6.76682900  | -4.87450500 | L |   |            |            |            |   |
| H                                                  | -1 | 5.61450100   | -0.75521500 | 5.40175700  | L |   |            |            |            |   |
| H                                                  | -1 | 4.33469500   | -7.41413600 | -4.02641100 | L |   |            |            |            |   |
| H                                                  | -1 | -6.50798200  | -6.24617000 | -4.66254800 | L |   |            |            |            |   |
| H                                                  | -1 | 1.63226700   | -1.90880500 | 7.44300800  | L |   |            |            |            |   |
| H                                                  | -1 | -5.80057500  | -5.51157800 | 6.72265400  | L |   |            |            |            |   |
| H                                                  | -1 | -8.97162700  | -3.60662200 | -0.60415900 | L |   |            |            |            |   |
| N                                                  | -1 | 9.98181400   | 2.26530700  | 2.48403900  | L |   |            |            |            |   |
| C                                                  | -1 | 8.62330800   | 1.73898600  | 2.21230900  | H |   |            |            |            |   |
| C                                                  | 0  | 8.27373700   | 1.88866100  | 0.71644800  | H |   |            |            |            |   |
| C                                                  | 0  | 6.95402700   | 1.29250300  | 0.30162300  | H |   |            |            |            |   |
| N                                                  | 0  | 6.84474600   | -0.04207000 | -0.05829700 | H |   |            |            |            |   |
| C                                                  | 0  | 5.58715700   | -0.22231300 | -0.43291700 | H |   |            |            |            |   |
| N                                                  | 0  | 4.88455700   | 0.93138100  | -0.33379300 | H |   |            |            |            |   |
| C                                                  | 0  | 5.73456900   | 1.90390800  | 0.13459200  | H |   |            |            |            |   |
| C                                                  | -1 | 8.56267900   | 0.24868200  | 2.64899400  | L |   |            |            |            |   |
| O                                                  | -1 | 7.55557900   | -0.18153800 | 3.20982800  | L |   |            |            |            |   |
| N                                                  | -1 | 9.58910300   | -0.51870200 | 2.29275600  | L |   |            |            |            |   |
| C                                                  | -1 | 9.60665300   | -1.95138000 | 2.50325600  | L |   |            |            |            |   |
| C                                                  | 0  | 8.82681000   | -2.73326100 | 1.42230300  | H |   |            |            |            |   |
| C                                                  | 0  | 9.45201800   | -2.55427600 | 0.02345800  | H |   |            |            |            |   |
| O                                                  | 0  | 10.31253300  | -3.30715200 | -0.38491200 | H |   |            |            |            |   |
| O                                                  | 0  | 9.02881200   | -1.51184300 | -0.68711300 | H |   |            |            |            |   |
| C                                                  | -1 | 11.00848500  | -2.50790300 | 2.62861800  | L |   |            |            |            |   |
| O                                                  | -1 | 12.00003200  | -1.77080900 | 2.38966900  | L |   |            |            |            |   |
| H                                                  | 0  | 9.06477600   | 1.42738100  | 0.08978900  | H |   |            |            |            |   |
| H                                                  | 0  | 8.26215100   | 2.96643100  | 0.45984300  | H |   |            |            |            |   |
| H                                                  | 0  | 5.39122000   | 2.91378600  | 0.32296300  | H |   |            |            |            |   |
| H                                                  | 0  | 3.88318700   | 1.00857000  | -0.51752000 | H |   |            |            |            |   |
| H                                                  | 0  | 5.13672800   | -1.14883100 | -0.76500600 | H |   |            |            |            |   |
| H                                                  | -1 | 7.86130100   | 2.29451000  | 2.81687900  | L |   |            |            |            |   |
| H                                                  | -1 | 10.43784700  | 2.56587700  | 1.64746000  | L |   |            |            |            |   |
| H                                                  | -1 | 9.92476400   | 3.02944800  | 3.12145800  | L |   |            |            |            |   |
| H                                                  | 0  | 8.86303700   | -3.81321400 | 1.65273700  | H |   |            |            |            |   |
| H                                                  | 0  | 7.76196100   | -2.41975000 | 1.42197100  | H |   |            |            |            |   |
| H                                                  | -1 | 9.06502800   | -2.18258000 | 3.46141900  | L |   |            |            |            |   |
| H                                                  | -1 | 10.26128400  | -0.16758700 | 1.64052300  | L |   |            |            |            |   |
| H                                                  | -1 | 11.13136100  | -3.56215200 | 2.90437000  | L |   |            |            |            |   |
| H                                                  | 0  | 8.19607000   | -1.04890300 | -0.33406400 | H |   |            |            |            |   |
| N                                                  | 0  | 1.78352100   | 1.89910700  | 2.62355900  | H |   |            |            |            |   |
| Glc_H507A                                          |    |              |             |             |   |   |            |            |            |   |
| ONIOM: extrapolated energy = -3126.956553393176 au |    |              |             |             |   |   |            |            |            |   |
| N                                                  | -1 | 3.34360300   | -7.56049700 | 2.21540100  | L |   |            |            |            |   |
| C                                                  | -1 | 2.16469800   | -6.72951100 | 2.11304900  | L |   |            |            |            |   |
| C                                                  | -1 | 2.50267500   | -5.47970400 | 1.25631800  | L |   |            |            |            |   |
| C                                                  | 0  | 1.40473500   | -4.45063000 | 1.08026000  | H |   |            |            |            |   |
| C                                                  | 0  | 1.74635500   | -3.44953900 | -0.08571600 | H |   |            |            |            |   |
| O                                                  | 0  | 2.91393500   | -2.97715300 | -0.10510700 | H |   |            |            |            |   |
| O                                                  | 0  | 0.79437700   | -3.17446800 | -0.87925700 | H |   |            |            |            |   |
| C                                                  | -1 | 1.04408900   | -7.51075400 | 1.41507700  | L |   |            |            |            |   |
| O                                                  | -1 | -0.13803600  | -7.42908900 | 1.83873300  | L |   |            |            |            |   |
| N                                                  | -1 | 1.70439500   | -7.14058400 | -4.94982100 | L |   |            |            |            |   |
| C                                                  | -1 | 2.70349400   | -6.12791200 | -4.67390700 | L |   |            |            |            |   |
| C                                                  | -1 | 2.05937900   | -4.84841900 | -4.10176900 | L |   |            |            |            |   |
| C                                                  | -1 | 0.74516200   | -4.40735800 | -4.72548500 | L |   |            |            |            |   |
| C                                                  | -1 | 0.57480500   | -4.35151400 | -6.10003000 | L |   |            |            |            |   |
| C                                                  | -1 | -0.62249500  | -3.91133100 | -6.65597100 | L |   |            |            |            |   |
| C                                                  | -1 | -1.64667200  | -3.48703100 | -5.82719600 | L |   |            |            |            |   |
| O                                                  | -1 | -2.84340600  | -3.04680200 | -6.33213700 | L |   |            |            |            |   |
| C                                                  | -1 | -1.49287100  | -3.52682600 | -4.45418800 | L |   |            |            |            |   |
| C                                                  | -1 | -0.30121000  | -3.97535100 | -3.91665000 | L |   |            |            |            |   |
| C                                                  | -1 | 3.66545900   | -6.74718100 | -3.67232100 | L |   |            |            |            |   |
| O                                                  | -1 | 3.47284300   | -6.59509700 | -2.43808400 | L |   |            |            |            |   |
| N                                                  | -1 | 6.23617400   | -7.04622900 | -1.63683600 | L |   |            |            |            |   |
| C                                                  | -1 | 7.13764200   | -6.26019600 | -0.80198700 | L |   |            |            |            |   |
| C                                                  | -1 | 6.75915100   | -4.78343000 | -0.84973600 | L |   |            |            |            |   |
| C                                                  | -1 | 6.63222000   | -4.25821100 | -2.25606900 | L |   |            |            |            |   |
| C                                                  | -1 | 7.67739500   | -4.45388200 | -3.16537800 | L |   |            |            |            |   |
| C                                                  | -1 | 7.57882100   | -4.01579300 | -4.46541800 | L |   |            |            |            |   |
| C                                                  | -1 | 6.42691900   | -3.38692400 | -4.86882300 | L |   |            |            |            |   |
| O                                                  | -1 | 6.37881500   | -2.95078500 | -6.16618300 | L |   |            |            |            |   |
| C                                                  | -1 | 5.37038300   | -3.17891300 | -4.00975300 | L |   |            |            |            |   |
| C                                                  | -1 | 5.47420600   | -3.61688200 | -2.69388700 | L |   |            |            |            |   |
| C                                                  | -1 | 7.01992300   | -6.71892000 | 0.64711000  | L |   |            |            |            |   |
| O                                                  | -1 | 5.88489400   | -6.86821200 | 1.16959600  | L |   |            |            |            |   |
| N                                                  | -1 | 5.89584600   | -3.75235800 | 4.30752700  | L |   |            |            |            |   |
| C                                                  | -1 | 5.59645000   | -2.40114000 | 3.88721500  | L |   |            |            |            |   |
| C                                                  | -1 | 4.54236500   | -2.40284900 | 2.80571700  | L |   |            |            |            |   |
| O                                                  | -1 | 5.03262700   | -3.18125100 | 1.70504100  | L |   |            |            |            |   |
| C                                                  | -1 | 4.22644200   | -0.98701400 | 2.33882600  | L |   |            |            |            |   |
| C                                                  | -1 | 5.12378000   | -1.56146100 | 5.08672600  | L |   |            |            |            |   |
| O                                                  | -1 | 4.06502800   | -1.87024800 | 5.69275000  | L |   |            |            |            |   |
| N                                                  | -1 | 3.99787200   | 1.53069500  | 5.73782400  | L |   |            |            |            |   |
| C                                                  | -1 | 2.76197100   | 2.35052200  | 5.80379600  | L |   |            |            |            |   |
| C                                                  | 0  | 2.58082800   | 3.32903600  | 4.64111500  | H |   |            |            |            |   |
| C                                                  | 0  | 2.83032400   | 2.26316500  | 3.27074000  | H |   |            |            |            |   |
| O                                                  | 0  | 3.98062500   | 2.20257900  | 3.08844900  | H |   |            |            |            |   |
| O                                                  | 0  | 1.83499400   | 2.55733200  | 2.46439700  | H |   |            |            |            |   |



|   |    |              |             |             |         |   |    |             |             |             |   |
|---|----|--------------|-------------|-------------|---------|---|----|-------------|-------------|-------------|---|
| C | -1 | -2.87793800  | 6.35568700  | -0.48463800 | L H 88  | O | 0  | 2.35098500  | 1.34743800  | -0.11049900 | H |
| C | -1 | -4.00436900  | 7.32035900  | -0.10971600 | L       | C | 0  | -2.33226400 | 1.07313300  | -1.61340800 | H |
| C | -1 | -4.76940800  | 6.88170700  | 1.14579000  | L       | O | 0  | -3.39045100 | 0.15577000  | -2.00395500 | H |
| C | -1 | -4.33707600  | 7.24949800  | 2.41210600  | L       | H | -1 | 2.85473900  | -5.82117600 | 0.25674100  | L |
| C | -1 | -5.02281100  | 6.85256500  | 3.55722400  | L       | H | -1 | 3.38083100  | -4.97891600 | 1.72195700  | L |
| C | -1 | -6.15655300  | 6.06966600  | 3.42874000  | L       | H | 0  | 0.42090500  | -4.91688200 | 0.86525500  | H |
| O | -1 | -6.84940000  | 5.67603600  | 4.56911100  | L       | H | 0  | 1.27905600  | -3.82824300 | 2.00199600  | H |
| C | -1 | -6.61064200  | 5.70401900  | 2.18301600  | L       | H | -1 | 1.84996500  | -6.42180400 | 3.13996100  | L |
| C | -1 | -5.90452500  | 6.10305600  | 1.04590800  | L       | H | -1 | 3.67329300  | -7.82418700 | 1.30966300  | L |
| C | -1 | -2.11763000  | 6.80221900  | -1.73228200 | L       | H | -1 | 4.05729000  | -7.09140600 | 2.73149400  | L |
| O | -1 | -2.17561500  | 7.97724000  | -2.13574500 | L       | H | -1 | 1.89160900  | -4.95282800 | -3.00879700 | L |
| N | -1 | -1.41768900  | 5.84749800  | -2.34492000 | L       | H | -1 | 2.78875400  | -4.01410300 | -4.21079400 | L |
| C | -1 | -0.35598200  | 6.13403200  | -3.34401600 | L H 102 | H | -1 | 1.39032000  | -4.66339200 | -6.76366300 | L |
| C | 0  | 0.56059900   | 4.90390600  | -3.45107400 | H       | H | -1 | -0.19273700 | -3.98888400 | -2.82318900 | L |
| C | 0  | -0.07361500  | 3.59153100  | -4.04387700 | H       | H | -1 | -0.72606500 | -3.88388700 | -7.74773900 | L |
| O | 0  | -1.32709400  | 3.47668300  | -4.11548600 | H       | H | -1 | -2.29274200 | -3.19348200 | -3.78174400 | L |
| O | 0  | 0.78407900   | 2.72020700  | -4.36944100 | H       | H | -1 | -2.78401500 | -3.08701700 | -7.27929400 | L |
| C | -1 | -0.84836400  | 6.57445300  | -4.71132700 | L       | H | -1 | 3.23538400  | -5.89175300 | -5.62802000 | L |
| O | -1 | -0.01084200  | 6.71254400  | -5.64033300 | L       | H | -1 | 2.13897900  | -7.99005800 | -5.24544600 | L |
| N | -1 | -8.90215200  | 5.59047300  | -5.32961700 | L       | H | -1 | 1.13815900  | -7.31205800 | -4.14516900 | L |
| C | -1 | -8.70694200  | 5.22406000  | -3.91551500 | L       | H | -1 | 5.80831600  | -4.60758200 | -0.30118500 | L |
| C | -1 | -7.29005800  | 5.54878300  | -3.47154100 | L       | H | -1 | 7.52398200  | -4.17182100 | -0.31950100 | L |
| C | -1 | -6.25684500  | 4.60768800  | -4.08393900 | L       | H | -1 | 8.61043400  | -4.91906800 | -2.81952200 | L |
| C | -1 | -4.84790800  | 4.91230800  | -3.66015800 | L       | H | -1 | 4.64220300  | -3.43871000 | -2.00245500 | L |
| O | -1 | -4.53601300  | 6.02500200  | -3.21567700 | L       | H | -1 | 8.43318000  | -4.14267000 | -5.14450200 | L |
| N | -1 | -3.96605900  | 3.91835600  | -3.79586600 | L       | H | -1 | 4.46364900  | -2.65632200 | -4.34798000 | L |
| C | -1 | -9.73969200  | 5.91019000  | -3.01608000 | L       | H | -1 | 7.24714300  | -3.05706700 | -6.53710900 | L |
| O | -1 | -10.16480300 | 5.32506400  | -1.98628500 | L       | H | -1 | 8.18074600  | -6.42228700 | -1.16985100 | L |
| N | -1 | -11.18402100 | 0.48143300  | 2.16799600  | L       | H | -1 | 6.29309300  | -6.71640000 | -2.58053000 | L |
| C | -1 | -9.98469200  | -0.27001700 | 2.50738000  | L       | H | -1 | 5.29221300  | -6.96356300 | -1.31159700 | L |
| C | -1 | -8.76953400  | 0.64253800  | 2.69551500  | L       | H | -1 | 3.59540100  | -2.88718700 | 3.17397700  | L |
| C | -1 | -8.16179100  | 1.12950600  | 1.40335400  | L       | H | -1 | 3.48849800  | -0.97035600 | 1.52289900  | L |
| C | -1 | -8.73832400  | 1.10532100  | 0.15553800  | L       | H | -1 | 5.13257800  | -0.46679200 | 1.99956500  | L |
| N | -1 | -7.88205800  | 1.67614300  | -0.76429000 | L       | H | -1 | 3.80847300  | -0.38259400 | 3.16006000  | L |
| C | -1 | -6.74465900  | 2.09423300  | -0.12329400 | L       | H | -1 | 4.31733700  | -3.21021300 | 1.07501300  | L |
| C | -1 | -6.88033500  | 1.75811000  | 1.24166400  | L       | H | -1 | 6.53171000  | -1.90346600 | 3.49153900  | L |
| C | -1 | -5.84356700  | 2.06591300  | 2.12051700  | L       | H | -1 | 5.24875900  | -4.42137300 | 3.94279200  | L |
| C | -1 | -4.70071300  | 2.66506700  | 1.63159000  | L       | H | -1 | 6.81784900  | -3.99463500 | 4.01150800  | L |
| C | -1 | -4.57496900  | 2.97252400  | 0.24724000  | L       | H | 0  | 1.57927300  | 3.79514900  | 4.69682900  | H |
| C | -1 | -5.59633500  | 2.70149200  | -0.62952200 | L       | H | 0  | 3.32826600  | 4.14241800  | 4.72793600  | H |
| C | -1 | -10.30258100 | -1.05177100 | 3.76663200  | L       | H | -1 | 2.78444200  | 2.96883100  | 6.73597800  | L |
| O | -1 | -10.68298800 | -0.44777600 | 4.80299700  | L       | H | -1 | 4.37542600  | 1.56885700  | 4.79518900  | L |
| N | -1 | -7.04704300  | -5.75379700 | 0.02253800  | L       | H | -1 | 4.66640700  | 1.89409400  | 6.38159400  | L |
| C | -1 | -6.90449800  | -4.34540800 | 0.39929800  | L       | H | -1 | 1.84593400  | -2.39791800 | 4.59251700  | L |
| C | -1 | -5.90325000  | -3.64694500 | -0.53215900 | L H 134 | H | -1 | -0.10834300 | -3.81043800 | 3.91346600  | L |
| C | 0  | -5.92642000  | -2.12945400 | -0.46662800 | H       | H | -1 | -1.22653100 | -2.70056900 | 4.72188300  | L |
| C | 0  | -5.04849600  | -1.56009700 | 0.67137600  | H       | H | -1 | -0.04854500 | -3.62775000 | 5.67174200  | L |
| O | 0  | -5.35212500  | -1.84012400 | 1.85028600  | H       | H | -1 | 0.73448900  | -2.07304800 | 2.39549700  | L |
| O | 0  | -4.08330300  | -0.81968400 | 0.29806900  | H       | H | -1 | -0.40609200 | -0.89571200 | 3.07785000  | L |
| C | -1 | -8.26143300  | -3.61797500 | 0.30998100  | L       | H | -1 | 1.32187900  | -0.50261800 | 2.96640800  | L |
| O | -1 | -8.70820400  | -2.99489800 | 1.30785800  | L       | H | -1 | -0.34243100 | -0.42428200 | 5.58257700  | L |
| N | -1 | -9.41302100  | -5.13374100 | -5.15652900 | L       | H | -1 | 2.45823600  | -0.07415900 | 4.92700100  | L |
| C | -1 | -8.00682000  | -4.92381600 | -5.49921900 | L       | H | 0  | 7.18345200  | -0.85491800 | -2.72712000 | H |
| C | -1 | -7.69551400  | -3.44363400 | -5.64916600 | L       | H | 0  | 8.20648400  | 0.54081100  | -2.42815100 | H |
| C | -1 | -6.27137800  | -3.20980500 | -6.13755900 | L H 144 | H | 0  | 5.02072600  | -0.61648700 | -3.84003000 | H |
| C | 0  | -5.97373700  | -1.76513000 | -6.53702600 | H       | H | 0  | 7.67689200  | 2.75779000  | -3.67368800 | H |
| N | 0  | -6.05989100  | -0.78741500 | -5.45461200 | H       | H | 0  | 3.20607400  | 0.82709000  | -4.58630500 | H |
| C | 0  | -5.09948000  | -0.50908800 | -4.51993200 | H       | H | 0  | 5.81193300  | 4.23830700  | -4.38359200 | H |
| N | 0  | -3.88193200  | -1.03345400 | -4.55931700 | H       | H | 0  | 2.49678300  | 3.12011500  | -4.74314400 | H |
| N | 0  | -5.41977300  | 0.34108700  | -3.54111800 | H       | H | -1 | 8.04635300  | -1.13856900 | -5.03360100 | L |
| C | -1 | -7.11966900  | -5.54347600 | -4.40103700 | L       | H | -1 | 10.41898300 | -1.29648200 | -4.45748200 | L |
| O | -1 | -7.29023100  | -5.21947700 | -3.19708300 | L       | H | -1 | 10.03857300 | -0.85824100 | -2.92578700 | L |
| N | -1 | -4.14600600  | -9.69242900 | 1.58113700  | L       | H | -1 | 7.16513200  | 8.24186400  | 2.22817900  | L |
| C | -1 | -3.52105200  | -8.41667500 | 1.93474400  | L       | H | -1 | 5.50646200  | 8.67592200  | 2.66143600  | L |
| C | -1 | -4.39105400  | -7.25869500 | 1.40231400  | L       | H | -1 | 6.52202200  | 9.64462600  | -0.94789500 | L |
| C | -1 | -3.58474400  | -6.00130700 | 1.15298800  | L       | H | -1 | 5.53295000  | 7.98589300  | -2.56605500 | L |
| C | -1 | -2.77259800  | -5.86879700 | 0.01476700  | L       | H | -1 | 4.66604100  | 6.16030100  | 2.39628000  | L |
| C | -1 | -1.99510000  | -4.75382200 | -0.17925700 | L       | H | -1 | 3.33785600  | 4.26484700  | 1.46519100  | L |
| C | -1 | -2.01326000  | -3.74657000 | 0.75234500  | L       | H | -1 | 3.86673300  | 5.68980000  | -2.55751800 | L |
| O | -1 | -1.24468100  | -2.63946800 | 0.57345100  | L       | H | -1 | 2.96641700  | 4.03065600  | -0.95188100 | L |
| C | -1 | -2.79935900  | -3.85396700 | 1.88721100  | L       | H | -1 | 5.83804600  | 10.77817800 | 1.07206600  | L |
| C | -1 | -3.59154100  | -4.97376200 | 2.06076300  | L       | H | -1 | 8.62792700  | 10.03631900 | 1.57441600  | L |
| C | -1 | -3.27917900  | -8.29264000 | 3.44313000  | L       | H | -1 | 8.10636800  | 11.48416200 | 1.03863700  | L |
| O | -1 | -4.11395900  | -8.76887000 | 4.25548200  | L       | H | 0  | -0.17865900 | 4.69759800  | 4.22402500  | H |
| N | -1 | -3.08627100  | -5.46726200 | 5.47511000  | L       | H | 0  | -2.52639700 | 4.10853900  | 4.63810500  | H |
| C | -1 | -3.74158200  | -4.39933100 | 6.21405200  | L       | H | 0  | -2.91004700 | 4.22870400  | 2.91130200  | H |
| C | -1 | -4.13111700  | -3.23400800 | 5.28028700  | L       | H | 0  | -2.49589100 | 5.69752000  | 3.84206300  | H |
| C | -1 | -3.92999700  | -1.89045300 | 5.93867900  | L H 167 | H | 0  | 0.32029600  | 2.79065200  | 2.93016000  | H |
| C | 0  | -4.49451200  | -0.72097200 | 5.13490000  | H       | H | 0  | 0.68554300  | 4.76471300  | 1.88402500  | H |
| N | 0  | -3.86190000  | -0.56458900 | 3.83043800  | H       | H | 0  | 0.51004700  | 7.15186300  | 1.96340200  | H |
| C | 0  | -2.86009300  | 0.27708500  | 3.51994400  | H       | H | 0  | -0.75969500 | 7.07281900  | 3.02858300  | H |
| N | 0  | -2.20155000  | 0.97360800  | 4.48510900  | H       | H | -1 | -4.70951800 | 7.38850000  | -0.96278100 | L |
| N | 0  | -2.58154100  | 0.48405800  | 2.24055300  | H       | H | -1 | -3.61831800 | 8.34966700  | 0.03988100  | L |
| C | -1 | -4.93184700  | -4.80873800 | 7.08982400  | L       | H | -1 | -3.42014500 | 7.84864000  | 2.51359300  | L |
| O | -1 | -5.05871700  | -4.32595300 | 8.24494800  | L       | H | -1 | -6.26291400 | 5.78607700  | 0.05677900  | L |
| C | 0  | 0.71396900   | -0.51761400 | -2.97197300 | H       | H | -1 | -4.65783100 | 7.14966300  | 4.54730600  | L |
| O | 0  | 0.94612700   | -0.21882700 | -4.32311200 | H       | H | -1 | -7.50708100 | 5.08234900  | 2.05748000  | L |
| C | 0  | 1.81946700   | 0.07843900  | -2.04698900 | H       | H | -1 | -7.59066700 | 5.15954200  | 4.27902300  | L |
| O | 0  | 2.93402400   | -0.78409000 | -2.06311700 | H       | H | -1 | -3.31278000 | 5.31825500  | -0.59465600 | L |
| O | 0  | -0.62778500  | -0.03268100 | -2.73437300 | H       | H | 0  | -1.65022600 | 7.14153900  | 1.13889100  | H |
| C | 0  | -1.02582900  | 0.32335300  | -1.42485500 | H       | H | 0  | 1.45911400  | 5.14491700  | -4.05365400 | H |
| C | 0  | 0.01454200   | 1.18389300  | -0.70099200 | H       | H | 0  | 0.96746400  | 4.63215100  | -2.45271700 | H |
| O | 0  | -0.45381800  | 1.46565600  | 0.62961000  | H       | H | -1 | 0.22670900  | 7.00402900  | -2.94185900 | L |
| C | 0  | 1.36869200   | 0.47850200  | -0.63113100 | H       | H | -1 | -1.89130200 | 4.96654400  | -2.48022100 | L |

|   |    |              |             |             |         |                                                    |    |             |             |             |         |
|---|----|--------------|-------------|-------------|---------|----------------------------------------------------|----|-------------|-------------|-------------|---------|
| H | -1 | -7.22689800  | 5.48442500  | -2.36359400 | L       | C                                                  | 0  | 8.33220900  | 1.87556500  | 0.73614800  | H       |
| H | -1 | -7.02753500  | 6.60108500  | -3.71261200 | L       | C                                                  | -1 | 8.66956900  | 0.32756200  | 2.65506400  | L       |
| H | -1 | -6.53208100  | 3.55997200  | -3.82765700 | L       | O                                                  | -1 | 7.66450500  | -0.10976800 | 3.21404900  | L       |
| H | -1 | -6.31332300  | 4.66744400  | -5.19112400 | L       | N                                                  | -1 | 9.70176700  | -0.43265200 | 2.30014200  | L       |
| H | -1 | -4.22584800  | 3.14921800  | -4.36735100 | L       | C                                                  | -1 | 9.72271800  | -1.86531600 | 2.50997900  | L H 376 |
| H | -1 | -2.95450700  | 4.02845800  | -3.66160000 | L       | C                                                  | 0  | 9.03482200  | -2.64304400 | 1.37028200  | H       |
| H | -1 | -8.86360300  | 4.11614500  | -3.86000700 | L       | C                                                  | 0  | 9.81070300  | -2.53305100 | -0.02725500 | H       |
| H | -1 | -9.85136600  | 5.42714000  | -5.59222500 | L       | O                                                  | 0  | 10.21392600 | -3.62863500 | -0.48281800 | H       |
| H | -1 | -8.67841100  | 6.55313000  | -5.47675700 | L       | O                                                  | 0  | 9.91173500  | -1.37242300 | -0.49998300 | H       |
| H | -1 | -7.98291800  | 0.08653700  | 3.24651600  | L       | C                                                  | -1 | 11.13409500 | -2.41231900 | 2.63738300  | L       |
| H | -1 | -9.01853900  | 1.52261900  | 3.32362300  | L       | O                                                  | -1 | 12.12099500 | -1.66838400 | 2.40040000  | L       |
| H | -1 | -9.73966400  | 0.75556700  | -0.10943100 | L       | H                                                  | 0  | 8.87476600  | 1.10919200  | 0.14651500  | H       |
| H | -1 | -7.92617600  | 1.49616000  | -1.73535200 | L       | H                                                  | 0  | 8.52229300  | 2.87514700  | 0.29521500  | H       |
| H | -1 | -5.94696000  | 1.82361600  | 3.18389400  | L       | H                                                  | -1 | 7.95402200  | 2.36849200  | 2.82277100  | L       |
| H | -1 | -3.88025600  | 2.95986700  | 2.30474800  | L       | H                                                  | -1 | 10.53056700 | 2.65793900  | 1.65769300  | L       |
| H | -1 | -5.51045000  | 2.95192400  | -1.69389700 | L       | H                                                  | -1 | 10.01194000 | 3.11729600  | 3.13106900  | L       |
| H | -1 | -3.65361700  | 3.46549300  | -0.10548700 | L       | H                                                  | 0  | 8.94924400  | -3.71469600 | 1.64474100  | H       |
| H | -1 | -9.78597100  | -0.97546800 | 1.66260400  | L       | H                                                  | 0  | 8.00369500  | -2.25331600 | 1.23398300  | H       |
| H | -1 | -11.97327200 | -0.13076300 | 2.13697400  | L       | H                                                  | -1 | 9.18711600  | -2.10062300 | 3.46715900  | L       |
| H | -1 | -11.35345700 | 1.20761600  | 2.83408700  | L       | H                                                  | -1 | 10.37260800 | -0.07665900 | 1.64917300  | L       |
| H | -1 | -6.13686400  | -3.90396200 | -1.58644800 | L       | H                                                  | -1 | 11.26368700 | -3.46584100 | 2.91283300  | L       |
| H | -1 | -4.88250900  | -4.03523800 | -0.32683000 | L       | H                                                  | 0  | 7.25264500  | 1.66947400  | 0.61932500  | H       |
| H | 0  | -5.56904600  | -1.71320200 | -1.42366400 | H       | G1c_H507Q                                          |    |             |             |             |         |
| H | 0  | -6.95614600  | -1.74684600 | -0.31276100 | H       | ONIOM: extrapolated energy = -3334.984063883607 au |    |             |             |             |         |
| H | -1 | -6.52294900  | -4.32322200 | 1.45256100  | L       | N                                                  | -1 | 3.01842500  | -7.68957100 | 2.21919200  | L       |
| H | -1 | -6.39276700  | -6.01040000 | -0.68972000 | L       | C                                                  | -1 | 1.86134000  | -6.82885300 | 2.11368900  | L       |
| H | -1 | -7.97115600  | -5.94242000 | -0.30971900 | L       | C                                                  | -1 | 2.23560700  | -5.58416000 | 1.26470700  | L H 4   |
| H | -1 | -8.40605900  | -2.97870000 | -6.36585700 | L       | C                                                  | 0  | 1.16591200  | -4.52608300 | 1.08786700  | H       |
| H | -1 | -7.85929200  | -2.91585700 | -4.68588800 | L       | C                                                  | 0  | 1.53965300  | -3.52320200 | -0.06542300 | H       |
| H | -1 | -6.07682400  | -3.83704700 | -7.03249800 | L       | O                                                  | 0  | 2.71650800  | -3.07203500 | -0.07145900 | H       |
| H | -1 | -5.54393400  | -3.56205300 | -5.37623600 | L       | O                                                  | 0  | 0.60208400  | -3.22079100 | -0.86557900 | H       |
| H | 0  | -6.67703300  | -1.43072400 | -7.32142200 | H       | C                                                  | -1 | 0.72570100  | -7.57866700 | 1.40563200  | L       |
| H | 0  | -4.96774500  | -1.68080700 | -6.98630700 | H       | O                                                  | -1 | -0.45651700 | -7.46924800 | 1.82271100  | L       |
| H | 0  | -6.99612800  | -0.59744300 | -5.12353700 | H       | N                                                  | -1 | 1.43310500  | -7.19721200 | -4.95353900 | L       |
| H | 0  | -3.59226300  | -1.78225300 | -5.19766300 | H       | C                                                  | -1 | 2.45559000  | -6.21113200 | -4.66717400 | L       |
| H | 0  | -3.21035700  | -0.73515100 | -3.83172800 | H       | C                                                  | -1 | 1.84031800  | -4.91841700 | -4.09301900 | L       |
| H | 0  | -6.20185100  | 0.96950600  | -3.66320000 | H       | C                                                  | -1 | 0.54131100  | -4.44180900 | -4.72242200 | L       |
| H | 0  | -4.66873200  | 0.51158600  | -2.79103500 | H       | C                                                  | -1 | 0.38062600  | -4.37566900 | -6.09767500 | L       |
| H | -1 | -7.81513000  | -5.46002400 | -6.46134700 | L       | C                                                  | -1 | -0.80192900 | -3.90316500 | -6.65862300 | L       |
| H | -1 | -9.99692000  | -4.76171200 | -5.87576400 | L       | C                                                  | -1 | -1.82009200 | -3.45696400 | -5.83395200 | L       |
| H | -1 | -9.63654800  | -4.70006300 | -4.28489300 | L       | O                                                  | -1 | -3.00238400 | -2.98464800 | -6.34389400 | L       |
| H | -1 | -4.87320400  | -7.54287600 | 0.44284100  | L       | C                                                  | -1 | -1.67554400 | -3.50663000 | -4.46026000 | L       |
| H | -1 | -5.22079300  | -7.03732900 | 2.10297500  | L       | C                                                  | -1 | -0.49872800 | -3.98724000 | -3.91778400 | L       |
| H | -1 | -2.75300000  | -6.68480700 | -0.71695000 | L       | C                                                  | -1 | 3.39573800  | -6.85872200 | -3.66278500 | L       |
| H | -1 | -4.12905700  | -4.64386400 | 2.98534000  | L       | O                                                  | -1 | 3.19961800  | -6.70728000 | -2.42902200 | L       |
| H | -1 | -1.37962400  | -4.67687400 | -1.08888900 | L       | N                                                  | -1 | 5.94594300  | -7.23107500 | -1.61363700 | L       |
| H | -1 | -2.85083100  | -3.04656700 | 2.63809700  | L       | C                                                  | -1 | 6.86181100  | -6.47156900 | -0.76995400 | L       |
| H | -1 | -0.78941100  | -2.70714400 | -0.26728400 | L       | C                                                  | -1 | 6.52072100  | -4.98558100 | -0.81321500 | L       |
| H | -1 | -2.52408000  | -8.39669700 | 1.42576800  | L       | C                                                  | -1 | 6.41539400  | -4.45117100 | -2.21786800 | L       |
| H | -1 | -4.33086000  | -9.71277700 | 0.59892300  | L       | C                                                  | -1 | 7.46075600  | -4.66899100 | -3.12191100 | L       |
| H | -1 | -5.00315700  | -9.81711000 | 2.07897300  | L       | C                                                  | -1 | 7.38095800  | -4.22286100 | -4.42050400 | L       |
| H | -1 | -5.18846700  | -3.35070700 | 4.95897600  | L       | C                                                  | -1 | 6.24760100  | -3.56354000 | -4.82779700 | L       |
| H | -1 | -3.54566400  | -3.26637300 | 4.32001500  | L       | O                                                  | -1 | 6.21819300  | -3.12063700 | -6.12342300 | L       |
| H | -1 | -4.36660100  | -1.89884900 | 6.95991100  | L       | C                                                  | -1 | 5.19149100  | -3.33288000 | -3.97400400 | L       |
| H | -1 | -2.84382600  | -1.70112100 | 6.09476200  | L       | C                                                  | -1 | 5.27644500  | -3.77909000 | -2.65955400 | L       |
| H | 0  | -5.57544800  | -0.86734300 | 4.94905900  | H       | C                                                  | -1 | 6.72398000  | -6.93355800 | 0.67632900  | L       |
| H | 0  | -4.37969900  | 0.22253300  | 5.70156800  | H       | O                                                  | -1 | 5.58246400  | -7.05663600 | 1.19146500  | L       |
| H | 0  | -4.31321200  | -1.07544700 | 3.04471000  | H       | N                                                  | -1 | 5.65270300  | -3.95585200 | 4.34352500  | L       |
| H | 0  | -3.14902800  | 0.00497100  | 1.52052400  | H       | C                                                  | -1 | 5.38976400  | -2.59571900 | 3.92760600  | L       |
| H | 0  | -1.68965500  | 0.87704300  | 1.91624700  | H       | C                                                  | -1 | 4.34245500  | -2.56623300 | 2.83994200  | L       |
| H | 0  | -1.91836100  | 0.47034400  | 5.32327700  | H       | O                                                  | -1 | 4.81945000  | -3.35190500 | 1.73884500  | L       |
| H | 0  | -1.52294700  | 1.66812400  | 4.13795800  | H       | C                                                  | -1 | 4.06488700  | -1.14089600 | 2.37764700  | L       |
| H | -1 | -2.94856800  | -3.92483700 | 6.87123100  | L       | C                                                  | -1 | 4.93111400  | -1.74972900 | 5.12812500  | L       |
| H | -1 | -3.40220700  | -5.42523300 | 4.52479900  | L       | O                                                  | -1 | 3.86135700  | -2.03453100 | 5.72652000  | L       |
| H | -1 | -1.98451000  | -4.79084300 | 5.67583200  | L       | N                                                  | -1 | 3.87914100  | 1.36679600  | 5.78664400  | L       |
| H | 0  | 0.72735700   | -1.60661600 | -2.85738000 | H       | C                                                  | -1 | 2.66378600  | 2.21706100  | 5.84909300  | L H 43  |
| H | 0  | 0.79586500   | 0.75342600  | -4.40762700 | H       | C                                                  | 0  | 2.51934500  | 3.19880800  | 4.68310400  | H       |
| H | 0  | 2.14640800   | 1.01444900  | -2.51541000 | H       | C                                                  | 0  | 2.77255800  | 2.50202200  | 3.31290300  | H       |
| H | 0  | 2.82267300   | -1.50993400 | -1.40103400 | H       | O                                                  | 0  | 3.91987800  | 2.05863000  | 3.13519900  | H       |
| H | 0  | -1.20321700  | -0.57628100 | -0.81033600 | H       | O                                                  | 0  | 1.78259600  | 2.44008300  | 2.49960700  | H       |
| H | 0  | 0.14773100   | 2.12767000  | -1.24366300 | H       | C                                                  | -1 | 1.40916400  | 1.31484200  | 5.95289900  | L       |
| H | 0  | -0.61154000  | 2.42587200  | 0.70376600  | H       | O                                                  | -1 | 0.36190200  | 1.80281300  | 6.40722300  | L       |
| H | 0  | 1.25280600   | -0.42613000 | -0.00966900 | H       | N                                                  | -1 | 1.54285000  | 0.04831600  | 5.56328400  | L       |
| H | 0  | 2.13954900   | 1.58843000  | 0.81924600  | H       | C                                                  | -1 | 0.49443600  | -0.97529800 | 5.69456200  | L       |
| H | 0  | -2.21399600  | 1.80043800  | -2.42197900 | H       | C                                                  | -1 | 0.61745100  | -2.03611900 | 4.56785000  | L       |
| H | 0  | -2.62974200  | 1.58467300  | -0.69054100 | H       | C                                                  | -1 | -0.41756100 | -3.13005000 | 4.73308000  | L       |
| H | 0  | -3.66768900  | -0.33806200 | -1.16522800 | H       | C                                                  | -1 | 0.43110800  | -1.37451100 | 3.20216200  | L       |
| O | -1 | 7.57383500   | 11.20969500 | 3.75473200  | L       | C                                                  | -1 | 0.55486400  | -1.70168300 | 7.04857700  | L       |
| H | -1 | 8.60707100   | 0.99282100  | -6.09429700 | L       | O                                                  | -1 | -0.50730700 | -1.95995600 | 7.67200100  | L       |
| H | -1 | 7.92887500   | -6.89562900 | 1.23563400  | L       | N                                                  | -1 | 9.55306100  | -1.49947000 | -3.71167200 | L       |
| H | -1 | 1.27857000   | -8.13241200 | 0.54019100  | L       | C                                                  | -1 | 8.47952300  | -0.69372200 | -4.25845500 | L H 58  |
| H | -1 | -2.37779900  | -7.77203200 | 3.79140100  | L       | C                                                  | 0  | 7.48437200  | -0.16207100 | -3.21434900 | H       |
| H | -1 | -10.20503300 | -2.14572500 | 3.77161800  | L       | C                                                  | 0  | 6.38050700  | 0.69409800  | -3.84961700 | H       |
| H | -1 | -10.10084800 | 6.91627300  | -3.27116300 | L       | C                                                  | 0  | 5.09148200  | 0.19155000  | -4.06108100 | H       |
| H | -1 | 5.55811100   | 11.37942400 | 3.44951200  | L       | C                                                  | 0  | 4.05038100  | 0.99240200  | -4.54040700 | H       |
| H | -1 | -1.91363600  | 6.77745600  | -4.88258100 | L       | C                                                  | 0  | 4.27362700  | 2.34869900  | -4.81320600 | H       |
| H | -1 | 5.72380200   | -0.69769200 | 5.40253000  | L       | O                                                  | 0  | 3.29424900  | 3.20141400  | -5.24338300 | H       |
| H | -1 | 4.50468500   | -7.36059300 | -4.03086600 | L       | C                                                  | 0  | 5.56792200  | 2.86197000  | -4.64158200 | H       |
| H | -1 | -6.34463200  | -6.26607100 | -4.68416700 | L       | C                                                  | 0  | 6.59233000  | 2.04847600  | -4.16125800 | H       |
| H | -1 | 1.74618000   | -1.87932000 | 7.43672600  | L       | C                                                  | -1 | 9.00140300  | 0.50913900  | -5.05674400 | L       |
| H | -1 | -5.66080500  | -5.53220200 | 6.70252200  | L       | O                                                  | -1 | 9.93719100  | 1.21250900  | -4.59506300 | L       |
| H | -1 | -8.83278500  | -3.64530200 | -0.62856100 | L       | N                                                  | -1 | 8.03418100  | 10.26325200 | 1.18855900  | L       |
| N | -1 | 10.07522500  | 2.35386900  | 2.49338300  | L       | C                                                  | -1 | 6.72885400  | 10.08766800 | 1.84126500  | L       |
| C | -1 | 8.72077600   | 1.81845600  | 2.21918300  | L H 371 |                                                    |    |             |             |             |         |

|   |    |              |             |             |         |   |    |             |             |             |         |
|---|----|--------------|-------------|-------------|---------|---|----|-------------|-------------|-------------|---------|
| C | -1 | 6.36790700   | 8.61040700  | 1.97594200  | L       | C | -1 | -4.00913000 | -4.36933700 | 6.19053500  | L       |
| C | -1 | 5.86440800   | 8.04259400  | 0.69278800  | L       | C | -1 | -4.36376400 | -3.19052300 | 5.25980500  | L       |
| C | -1 | 6.07338100   | 8.55133600  | -0.57884800 | L       | C | -1 | -4.13299700 | -1.85534000 | 5.92545800  | L H 167 |
| N | -1 | 5.44448600   | 7.78587100  | -1.50771700 | L       | C | 0  | -4.66324200 | -0.66838600 | 5.12408400  | H       |
| C | -1 | 4.82289700   | 6.73113100  | -0.87489100 | L       | N | 0  | -4.01824800 | -0.52104500 | 3.82422300  | H       |
| C | -1 | 5.07581500   | 6.85501500  | 0.51245600  | L       | C | 0  | -2.99375900 | 0.29607200  | 3.52460300  | H       |
| C | -1 | 4.51984700   | 5.90762800  | 1.39172300  | L       | N | 0  | -2.32308900 | 0.97078200  | 4.49675300  | H       |
| C | -1 | 3.76442400   | 4.88117700  | 0.85320500  | L       | N | 0  | -2.70080800 | 0.50247000  | 2.24779400  | H       |
| C | -1 | 3.55372700   | 4.76118000  | -0.52364100 | L       | C | -1 | -5.21448900 | -4.75261300 | 7.05744300  | L       |
| C | -1 | 4.06455400   | 5.68375900  | -1.40894700 | L       | O | -1 | -5.33612800 | -4.27187800 | 8.21398400  | L       |
| C | -1 | 6.66368700   | 10.81211700 | 3.18285100  | L       | C | 0  | 0.61042400  | -0.58718700 | -2.91314300 | H       |
| N | 0  | 0.09173600   | 6.52768200  | 2.71998400  | H       | O | 0  | 0.84648000  | -0.29409700 | -4.26378600 | H       |
| C | 0  | -0.25601000  | 5.19549500  | 2.21530100  | H       | C | 0  | 1.72487200  | -0.00747800 | -1.98820100 | H       |
| C | 0  | -0.82291300  | 4.34232600  | 3.40332400  | H       | O | 0  | 2.83470800  | -0.87556200 | -1.98587800 | H       |
| O | 0  | -0.71269100  | 2.95988400  | 3.15576200  | H       | O | 0  | -0.71833000 | -0.07159600 | -2.67631200 | H       |
| C | 0  | -2.28626600  | 4.62597900  | 3.73448000  | H       | C | 0  | -1.11186300 | 0.31766300  | -1.37577300 | H       |
| C | 0  | -1.19042900  | 5.12567100  | 0.99343500  | H       | C | 0  | -0.04804000 | 1.15087200  | -0.64977100 | H       |
| O | 0  | -1.35951200  | 4.07188100  | 0.38015300  | H       | O | 0  | -0.51143300 | 1.44990200  | 0.67676800  | H       |
| N | 0  | -1.83282500  | 6.29124200  | 0.66787300  | H       | C | 0  | 1.27546700  | 0.39237300  | -0.57351900 | H       |
| C | -1 | -2.83634200  | 6.38997100  | -0.45405900 | L H 88  | O | 0  | 2.29350900  | 1.21356700  | -0.02695800 | H       |
| C | -1 | -3.94047600  | 7.38092600  | -0.08137400 | L       | C | 0  | -2.39277900 | 1.10698000  | -1.58668000 | H       |
| C | -1 | -4.72375200  | 6.95608300  | 1.16761800  | L       | O | 0  | -3.46940100 | 0.22068800  | -1.99562100 | H       |
| C | -1 | -4.28992000  | 7.30735100  | 2.43810500  | L       | H | -1 | 2.58499700  | -5.92994300 | 0.26561600  | L       |
| C | -1 | -4.99221500  | 6.92271100  | 3.57736700  | L       | H | -1 | 3.12326000  | -5.10758600 | 1.73769000  | L       |
| C | -1 | -6.14442200  | 6.16905800  | 3.43868200  | L       | H | 0  | 0.17284700  | -4.96537500 | 0.86014200  | H       |
| O | -1 | -6.85371600  | 5.78791900  | 4.57317000  | L       | H | 0  | 1.04773900  | -3.90893300 | 2.01403800  | H       |
| C | -1 | -6.60007400  | 5.82038800  | 2.18866800  | L       | H | -1 | 1.54828100  | -6.51785600 | 3.14013900  | L       |
| C | -1 | -5.87739900  | 6.20658600  | 1.05754500  | L       | H | -1 | 3.34681400  | -7.95746200 | 1.31421600  | L       |
| C | -1 | -2.05764200  | 6.82277300  | -1.69518300 | L       | H | -1 | 3.74054000  | -7.24079400 | 2.74158800  | L       |
| O | -1 | -2.08376500  | 8.00063900  | -2.09363900 | L       | H | -1 | 1.66345500  | -5.02338600 | -3.00153400 | L       |
| N | -1 | -1.37818500  | 5.85350300  | -2.30803400 | L       | H | -1 | 2.59100000  | -4.10218100 | -4.19397300 | L       |
| C | -1 | -0.30368200  | 6.11770600  | -3.29957500 | L H 102 | H | -1 | 1.19202500  | -4.70498000 | -6.75792300 | L       |
| C | 0  | 0.58139400   | 4.86188700  | -3.41350400 | H       | H | -1 | -0.39715500 | -4.00831900 | -2.82377500 | L       |
| C | 0  | -0.08900300  | 3.55428900  | -3.98123300 | H       | H | -1 | -0.89825100 | -3.86833600 | -7.75084500 | L       |
| O | 0  | -1.34446000  | 3.47273000  | -4.05378800 | H       | H | -1 | -2.47081900 | -3.15629400 | -3.79101200 | L       |
| O | 0  | 0.74131000   | 2.65019800  | -4.28571700 | H       | H | -1 | -2.93835800 | -3.02218100 | -7.29086300 | L       |
| C | -1 | -0.77669600  | 6.57634100  | -4.66773600 | L       | H | -1 | 2.99892100  | -5.98419600 | -5.61706800 | L       |
| O | -1 | 0.06956000   | 6.69746800  | -5.59117700 | L       | H | -1 | 1.84803400  | -8.05600900 | -5.25046500 | L       |
| N | -1 | -8.84876400  | 5.79734200  | -5.33771400 | L       | H | -1 | 0.85795300  | -7.35796700 | -4.15300900 | L       |
| C | -1 | -8.67125000  | 5.41994100  | -3.92417000 | L       | H | -1 | 5.57132700  | -4.78835700 | -0.26945700 | L       |
| C | -1 | -7.24935500  | 5.70708100  | -3.47042300 | L       | H | -1 | 7.29745000  | -4.39567600 | -0.27573000 | L       |
| C | -1 | -6.23639700  | 4.74307300  | -4.08101900 | L       | H | -1 | 8.37976600  | -5.15894100 | -2.77270500 | L       |
| C | -1 | -4.82283000  | 5.01040500  | -3.64760300 | L       | H | -1 | 4.44499900  | -3.58313600 | -1.97215700 | L       |
| O | -1 | -4.48582400  | 6.11296400  | -3.19625000 | L       | H | -1 | 8.23591500  | -4.36813600 | -5.09513400 | L       |
| N | -1 | -3.96536000  | 3.99524600  | -3.78263400 | L       | H | -1 | 4.30017000  | -2.78623400 | -4.31516600 | L       |
| C | -1 | -9.69184700  | 6.12779300  | -3.02770100 | L       | H | -1 | 7.08578700  | -3.27402800 | -6.48972900 | L       |
| O | -1 | -10.13762800 | 5.54899200  | -2.00308500 | L       | H | -1 | 7.90270800  | -6.65814600 | -1.13242600 | L       |
| N | -1 | -11.30266200 | 0.71423600  | 2.12310600  | L       | H | -1 | 6.01674500  | -6.89863400 | -2.55547300 | L       |
| C | -1 | -10.12458200 | -0.06853400 | 2.46610200  | L       | H | -1 | 5.00242200  | -7.12619500 | -1.29356800 | L       |
| C | -1 | -8.88809400  | 0.81243000  | 2.66550400  | L       | H | -1 | 3.38146700  | -3.02829900 | 3.20044400  | L       |
| C | -1 | -8.26063200  | 1.28967700  | 1.37915400  | L       | H | -1 | 3.33248200  | -1.10215500 | 1.55748900  | L       |
| C | -1 | -8.83012100  | 1.28543800  | 0.12788100  | L       | H | -1 | 4.98578100  | -0.64207300 | 2.04607200  | L       |
| N | -1 | -7.95434300  | 1.83864600  | -0.78430700 | L       | H | -1 | 3.65728800  | -0.52979900 | 3.19915200  | L       |
| C | -1 | -6.81068000  | 2.22526500  | -0.13475900 | L       | H | -1 | 4.10786900  | -3.36005100 | 1.10401700  | L       |
| C | -1 | -6.96288900  | 1.88665600  | 1.22784000  | L       | H | -1 | 6.33954500  | -2.11991900 | 3.53968600  | L       |
| C | -1 | -5.92400700  | 2.16450100  | 2.11414700  | L       | H | -1 | 4.99125300  | -4.60682300 | 3.97196700  | L       |
| C | -1 | -4.76360300  | 2.73695400  | 1.63465800  | L       | H | -1 | 6.57010200  | -4.21986900 | 4.05182200  | L       |
| C | -1 | -4.62192500  | 3.04723900  | 0.25248000  | L       | H | 0  | 1.52662000  | 3.68358200  | 4.72348500  | H       |
| C | -1 | -5.64450000  | 2.80575700  | -0.63147900 | L       | O | 0  | 3.28099600  | 3.99723900  | 4.78106900  | H       |
| C | -1 | -10.46947400 | -0.84759500 | 3.71990500  | L       | H | -1 | 2.69617100  | 2.83050600  | 6.78418600  | L       |
| O | -1 | -10.84082100 | -0.23881100 | 4.75675400  | L       | H | -1 | 4.26316000  | 1.39962000  | 4.84642400  | L       |
| N | -1 | -7.31041400  | -5.61328000 | -0.02634700 | L       | H | -1 | 4.55270800  | 1.71048500  | 6.43596900  | L       |
| C | -1 | -7.13488900  | -4.21057800 | 0.35763600  | L       | H | -1 | 1.63635700  | -2.50155400 | 4.61090600  | L       |
| C | -1 | -6.11091400  | -3.5335400  | -0.56475200 | L H 134 | H | -1 | -0.34859400 | -3.86163000 | 3.91399700  | L       |
| C | 0  | -6.09386400  | -2.01589100 | -0.49143500 | H       | H | -1 | -1.44344300 | -2.72763300 | 4.72087300  | L       |
| C | 0  | -5.20709300  | -1.47426000 | 0.65354600  | H       | H | -1 | -0.29474900 | -2.68822500 | 5.67340500  | L       |
| O | 0  | -5.52397900  | -1.75164300 | 1.82960700  | H       | H | -1 | 0.54655000  | -2.13926800 | 2.40890300  | L       |
| O | 0  | -4.22134000  | -0.75630000 | 0.28946100  | H       | H | -1 | -0.56824100 | -0.93671200 | 3.08989400  | L       |
| C | -1 | -8.47262100  | -3.44896300 | 0.26366600  | L       | H | -1 | 1.16966900  | -0.58658400 | 2.99037600  | L       |
| O | -1 | -8.90960100  | -2.81926900 | 1.26171700  | L       | H | -1 | -0.50776400 | -0.47803400 | 5.59706800  | L       |
| N | -1 | -9.62912000  | -4.91134700 | -5.21633100 | L       | H | -1 | 2.30466300  | -0.19537000 | 4.95952600  | L       |
| C | -1 | -8.21607900  | -4.73524400 | -5.54981100 | L       | H | 0  | 7.03408800  | -1.01649900 | -2.67730500 | L       |
| C | -1 | -7.86690500  | -3.26268900 | -5.69120700 | L       | H | 0  | 8.01957800  | 0.43113000  | -2.44848200 | H       |
| C | -1 | -6.43446300  | -3.06250000 | -6.17017000 | L H 144 | H | 0  | 4.85932700  | -0.83999900 | -3.79844600 | H       |
| C | 0  | -6.09653900  | -1.62239100 | -6.55412100 | H       | H | 0  | 7.56317500  | 2.49655300  | -3.95752200 | H       |
| N | 0  | -6.16015000  | -0.65371200 | -5.46110900 | H       | H | 0  | 3.06100100  | 0.56151600  | -4.65887000 | H       |
| C | 0  | -5.19461400  | -0.40116000 | -4.52512200 | H       | H | 0  | 5.73896300  | 3.91964400  | -4.83365400 | H       |
| N | 0  | -3.98986800  | -0.95447700 | -4.56401000 | H       | H | 0  | 2.40357100  | 2.90352200  | -4.92538900 | H       |
| N | 0  | -5.49420600  | 0.45419300  | -3.54391600 | H       | H | -1 | 7.92380000  | -1.35579700 | -4.97286100 | L       |
| C | -1 | -7.35130700  | -5.38177300 | -4.44927100 | L       | H | -1 | 10.28824500 | -1.57568300 | -4.38356000 | L       |
| O | -1 | -7.52089400  | -5.05889100 | -3.24487790 | L       | H | -1 | 9.90978300  | -1.13477300 | -2.85214900 | L       |
| N | -1 | -4.51831000  | -9.63022600 | 1.53133700  | L       | H | -1 | 7.23443000  | 8.01179100  | 2.32615200  | L       |
| C | -1 | -3.86372200  | -8.37210900 | 1.89439300  | L       | H | -1 | 5.58459300  | 8.48539500  | 2.75164100  | L       |
| C | -1 | -4.70124700  | -7.19035000 | 1.36213400  | L       | H | -1 | 6.64565400  | 9.44417700  | -0.84723600 | L       |
| C | -1 | -3.86222000  | -5.95249200 | 1.12325500  | L       | H | -1 | 5.62503400  | 7.81789100  | -2.47868500 | L       |
| C | -1 | -3.04022000  | -5.83538900 | -0.00957000 | L       | H | -1 | 4.68302100  | 5.99283000  | 2.47013800  | L       |
| C | -1 | -2.23389300  | -4.73941800 | -0.19396400 | L       | H | -1 | 3.31338600  | 4.13536200  | 1.52266300  | L       |
| C | -1 | -2.23239000  | -3.73612800 | 0.74207700  | L       | H | -1 | 3.90180400  | 5.56428500  | -2.49034800 | L       |
| O | -1 | -1.43525400  | -2.64786300 | 0.57272900  | L       | H | -1 | 2.95063100  | 3.92118400  | -0.89756400 | L       |
| C | -1 | -3.02769700  | -3.82876700 | 1.87181600  | L       | H | -1 | 5.97822400  | 10.58563800 | 1.17380600  | L       |
| C | -1 | -3.84870200  | -4.92909800 | 2.03563200  | L       | H | -1 | 8.74559600  | 9.77185700  | 1.68913600  | L       |
| C | -1 | -3.62783800  | -8.26080500 | 3.40471900  | L       | H | -1 | 8.26367700  | 11.23466200 | 1.15688800  | L       |
| O | -1 | -4.47912600  | -8.71951900 | 4.20999100  | L       | H | 0  | -0.19898300 | 4.64394700  | 4.25873200  | H       |
| N | -1 | -3.37636800  | -5.45010700 | 5.45060700  | L       | H | 0  | -2.56107300 | 4.10836900  | 4.66029700  | H       |

|   |    |              |             |             |   |    |             |              |               |   |
|---|----|--------------|-------------|-------------|---|----|-------------|--------------|---------------|---|
| H | 0  | -2.93464700  | 4.24358000  | 2.93232700  | H | 0  | -2.69110300 | 1.62810600   | -0.66909400   | H |
| H | 0  | -2.49009700  | 5.69876800  | 3.87012500  | H | 0  | -3.77111100 | -0.27198400  | -1.16532900   | H |
| H | 0  | 0.25688900   | 2.72706900  | 2.95820900  | H | 0  | 7.70821100  | 10.96170600  | 3.86853800    | L |
| H | 0  | 0.67663500   | 4.70171000  | 1.92017800  | H | -1 | 8.54406000  | 0.76550300   | -6.02056000   | L |
| H | 0  | 0.56762900   | 7.08837100  | 2.01817700  | H | -1 | 7.62468600  | -7.13558600  | 1.26936600    | L |
| H | 0  | -0.71557000  | 7.03907600  | 3.07039700  | H | -1 | 0.94976400  | -8.20216000  | 0.52932000    | L |
| H | -1 | -4.63858500  | 7.47047400  | -0.93824200 | L | H  | -1          | -2.71579900  | -7.76449800   | L |
| H | -1 | -3.52966400  | 8.39956300  | 0.07515700  | L | H  | -1          | -10.39939000 | -1.94366200   | L |
| H | -1 | -3.35889200  | 7.88286200  | 2.54768800  | L | H  | -1          | -10.02615700 | 7.14372600    | L |
| H | -1 | -6.23769700  | 5.90304200  | 0.06490200  | L | H  | -1          | 5.69923200   | 11.18326400   | L |
| H | -1 | -4.62583100  | 7.20621200  | 4.57091200  | L | H  | -1          | -1.83550700  | 6.80674300    | L |
| H | -1 | -7.51103800  | 5.22194900  | 2.05505500  | L | H  | -1          | 5.55068500   | -0.90267300   | L |
| H | -1 | -7.60594000  | 5.29145400  | 4.27639600  | L | H  | -1          | 4.22146300   | -7.49140300   | L |
| H | -1 | -3.29636500  | 5.36426000  | -0.57133800 | L | H  | -1          | -6.59293500  | -6.12232400   | L |
| H | 0  | -1.59334900  | 7.13705000  | 1.17611800  | H | H  | -1          | 1.53262600   | -1.99311800   | L |
| H | 0  | 1.47316700   | 5.07239800  | -4.03814300 | H | H  | -1          | -5.95901200  | -5.45586200   | L |
| H | 0  | 1.00119800   | 4.59169800  | -2.42018700 | H | H  | -1          | -9.03885800  | -3.45783200   | L |
| H | -1 | 0.29820500   | 6.97104800  | -2.89006000 | L | N  | -1          | 9.99449300   | 2.05156000    | L |
| H | -1 | -1.87289900  | 4.98530400  | -2.45011000 | L | C  | -1          | 8.62869900   | 1.55149400    | L |
| H | -1 | -7.19445100  | 5.63629200  | -2.36242900 | L | C  | 0           | 8.23043900   | 1.66282900    | L |
| H | -1 | -6.95912000  | 6.75351800  | -3.70516900 | L | C  | -1          | 8.53758800   | 0.06045500    | L |
| H | -1 | -6.53931700  | 3.70147300  | -3.83111600 | L | O  | -1          | 7.51855100   | -0.35398700   | L |
| H | -1 | -6.28474200  | 4.80909000  | -5.18823300 | L | N  | -1          | 9.55251200   | -0.72383600   | L |
| H | -1 | -4.24091200  | 3.23539700  | -4.35913800 | L | C  | -1          | 9.53631500   | -2.15748500   | L |
| H | -1 | -2.95218800  | 4.07938300  | -3.64196500 | L | C  | 0           | 8.82605500   | -2.98481600   | L |
| H | -1 | -8.85594200  | 4.31606900  | -3.87461300 | L | C  | 0           | 9.62188100   | -2.88216700   | L |
| H | -1 | -9.80018500  | 5.65901700  | -5.60662300 | L | O  | 0           | 9.97800600   | -4.00651700   | L |
| H | -1 | -8.60010500  | 6.75472400  | -5.47916600 | L | O  | 0           | 9.78070500   | -1.73810000   | L |
| H | -1 | -8.11895900  | 0.23446400  | 3.21857800  | L | C  | -1          | 10.93276300  | -2.74025700   | L |
| H | -1 | -9.11872600  | 1.69571000  | 3.29613100  | L | O  | -1          | 11.93938600  | -2.02026800   | L |
| H | -1 | -9.83830600  | 0.96207100  | -0.14454100 | L | H  | 0           | 8.70137500   | 0.85323700    | L |
| H | -1 | -7.99715100  | 1.66409400  | -1.75641800 | L | H  | 0           | 8.56158200   | 2.62646300    | L |
| H | -1 | -6.03979100  | 1.92020500  | 3.17578800  | L | H  | -1          | 7.87239300   | 2.11793600    | L |
| H | -1 | -3.94005700  | 3.00812800  | 2.31394800  | L | H  | -1          | 10.46229100  | 2.34779900    | L |
| H | -1 | -5.54600900  | 3.05863000  | -1.69418500 | L | H  | -1          | 9.94653700   | 2.81353500    | L |
| H | -1 | -3.68642200  | 3.51849500  | -0.09259500 | L | H  | 0           | 8.68451000   | -3.98478700   | L |
| H | -1 | -9.93854800  | -0.77502800 | 1.61931100  | L | H  | 0           | 7.81623400   | -2.48973200   | L |
| H | -1 | -12.10680100 | 0.12216500  | 2.08467600  | L | H  | -1          | 8.98927700   | -2.38348700   | L |
| H | -1 | -11.45783500 | 1.44150600  | 2.79148300  | L | H  | -1          | 10.23594000  | -0.38191900   | L |
| H | -1 | -6.34458300  | -3.77979800 | -1.62154900 | L | H  | -1          | 11.03427800  | -3.79789700   | L |
| H | -1 | -5.10146200  | -3.94801800 | -0.35520400 | L | C  | 0           | 6.69650000   | 1.60567200    | L |
| H | 0  | -5.72083300  | -1.60424800 | -1.44451800 | H | C  | 0           | 6.26559000   | 2.25855500    | L |
| H | 0  | -7.11385500  | -1.60709000 | -0.34046900 | H | O  | 0           | 7.00486800   | 3.03470900    | L |
| H | -1 | -6.75920800  | -4.20259200 | 1.41320800  | L | N  | 0           | 5.02444100   | 1.93696800    | L |
| H | -1 | -6.65852500  | -5.88307700 | -0.73591300 | L | H  | 0           | 4.70027200   | 2.34422900    | L |
| H | -1 | -8.23695900  | -5.77721100 | -0.36487200 | L | H  | 0           | 4.35730600   | 1.36768600    | L |
| H | -1 | -8.56128500  | -2.77694000 | -6.40993300 | L | H  | 0           | 6.17587400   | 2.13225300    | L |
| H | -1 | -8.02316600  | -2.73520800 | -4.72651800 | L | H  | 0           | 6.32727600   | 0.57283600    | L |
| H | -1 | -6.25033800  | -3.69048500 | -7.06679400 | L |    |             |              |               |   |
| H | -1 | -5.72063500  | -3.43621900 | -5.40620300 | L |    |             |              |               |   |
| H | 0  | -6.78775800  | -1.26073300 | -7.33702400 | H |    |             |              |               |   |
| H | 0  | -5.08719400  | -1.56776600 | -6.99907600 | H |    |             |              |               |   |
| H | 0  | -7.09197000  | -0.43909600 | -5.13273800 | H |    |             |              |               |   |
| H | 0  | -3.71881300  | -1.71002100 | -5.20262300 | H | N  | -1          | 3.09209100   | -7.65580500   | L |
| H | 0  | -3.31284400  | -0.67577100 | -3.83420600 | H | C  | -1          | 1.92864100   | -6.80331900   | L |
| H | 0  | -6.25962700  | 1.10309400  | -3.66447100 | H | C  | -1          | 2.29092500   | -5.55742800   | L |
| H | 0  | -4.74108800  | 0.60713500  | -2.79466600 | H | C  | 0           | 1.21419600   | -4.50571700   | L |
| H | -1 | -8.03213300  | -5.27185800 | -6.51322400 | L | C  | 0           | 1.57711000   | -3.49569300   | L |
| H | -1 | -10.19920900 | -4.52163700 | -5.93728200 | L | O  | 0           | 2.74881500   | -3.03595400   | L |
| H | -1 | -9.84692100  | -4.47603400 | -4.34406100 | L | O  | 0           | 0.63085100   | -3.19764100   | L |
| H | -1 | -5.18462100  | -7.45813400 | 0.39857000  | L | C  | -1          | 0.79548100   | -7.56215700   | L |
| H | -1 | -5.52935500  | -6.95132800 | 2.05891400  | L | O  | -1          | -0.38582600  | -7.46027800   | L |
| H | -1 | -3.03669600  | -6.64841200 | -0.74485700 | L | N  | -1          | 1.47529100   | -7.18613400   | L |
| H | -1 | -4.38330300  | -4.58989100 | 2.95852900  | L | C  | -1          | 2.49200700   | -6.19250900   | L |
| H | -1 | -1.61125700  | -4.67393200 | -1.09961300 | L | C  | -1          | 1.87001400   | -4.90316900   | L |
| H | -1 | -3.06341600  | -3.02363600 | 2.62604700  | L | C  | -1          | 0.56526700   | -4.43662200   | L |
| H | -1 | -0.97682900  | -2.73270700 | -0.26562000 | L | C  | -1          | 0.39873800   | -4.37383500   | L |
| H | -1 | -2.86353800  | -8.37490000 | 1.39136900  | L | C  | -1          | -0.78926200  | -3.91047200   | L |
| H | -1 | -4.69774200  | -9.64161700 | 0.54797300  | L | C  | -1          | -1.80726500  | -3.47001700   | L |
| H | -1 | -5.38127600  | -9.73556000 | 2.02356500  | L | O  | -1          | -2.99480000  | -3.00675500   | L |
| H | -1 | -5.42176700  | -3.27925900 | 4.93176900  | L | C  | -1          | -1.65699200  | -3.51644200   | L |
| H | -1 | -3.77357800  | -3.23333800 | 4.30284500  | L | C  | -1          | -0.47476200  | -3.98797200   | L |
| H | -1 | -4.57576500  | -1.85726800 | 6.94406500  | L | C  | -1          | 3.44056400   | -6.83191700   | L |
| H | -1 | -3.04337300  | -1.69398600 | 6.08876900  | L | O  | -1          | 3.24823200   | -6.67983600   | L |
| H | 0  | -5.74601100  | -0.78721300 | 4.93009400  | H | N  | -1          | 6.00130800   | -7.18321000   | L |
| H | 0  | -4.52947400  | 0.26925500  | 5.69624300  | H | C  | -1          | 6.91517000   | -6.41598800   | L |
| H | 0  | -4.47700900  | -1.01713200 | 3.03292400  | H | C  | -1          | 6.56358700   | -4.93247800   | L |
| H | 0  | -3.27504300  | 0.04113100  | 1.52114400  | H | C  | -1          | 6.44904200   | -4.40109700   | L |
| H | 0  | -1.79645500  | 0.87493500  | 1.93556600  | H | C  | -1          | 7.49234300   | -4.61311700   | L |
| H | 0  | -2.06230700  | 0.45860300  | 5.33663700  | H | C  | -1          | 7.40435800   | -4.16966500   | L |
| H | 0  | -1.62285500  | 1.64707800  | 4.15780500  | H | C  | -1          | 6.26485500   | -3.51889700   | L |
| H | -1 | -3.20842100  | -3.91776900 | 6.85450200  | L | O  | -1          | 6.22729000   | -3.07831600   | L |
| H | -1 | -3.68546700  | -5.39599500 | 4.49866000  | L | C  | -1          | 5.21052000   | -3.29419300   | L |
| H | -1 | -2.25923000  | -4.80241600 | 5.66085700  | L | C  | -1          | 5.30372500   | -3.73766500   | L |
| H | 0  | 0.60145000   | -1.67546400 | -2.79586800 | H | C  | -1          | 6.78622400   | -6.87657200   | L |
| H | 0  | 0.71069200   | 0.68053600  | -4.34852100 | H | O  | -1          | 5.64761900   | -7.00674100   | L |
| H | 0  | 2.06151900   | 0.92249600  | -2.46284600 | H | N  | -1          | 5.70864300   | -3.90042400   | L |
| H | 0  | 2.69221400   | -1.62110400 | -1.34935200 | H | C  | -1          | 5.43462300   | -2.54282900   | L |
| H | 0  | -1.32369300  | -0.56649300 | -0.75010800 | H | C  | -1          | 4.38287900   | -2.52239200   | L |
| H | 0  | 0.12070700   | 2.08725600  | -1.19525700 | H | O  | -1          | 4.86107500   | -3.30650700   | L |
| H | 0  | -0.67752700  | 2.41052500  | 0.73728600  | H | C  | -1          | 4.09359700   | -1.09976800   | L |
| H | 0  | 1.12379000   | -0.51236500 | 0.03796400  | H | C  | -1          | 4.97480900   | -1.69809600   | L |
| H | 0  | 2.06509700   | 1.49745200  | 0.89048700  | H | O  | -1          | 3.90941100   | -1.98935100   | L |
| H | 0  | -2.24046000  | 1.83026400  | -2.39314800 | H | N  | -1          | 3.90377300   | 1.41211000    | L |
|   |    |              |             |             |   | C  | -1          | 2.68279500   | 2.25401100    | L |
| H | 0  | -2.69110300  | 1.62810600  | -0.66909400 | H | 0  | -2.69110300 | 1.62810600   | -0.66909400   | H |
| H | 0  | -3.77111100  | -0.27198400 | -1.16532900 | H | 0  | -3.77111100 | -0.27198400  | -1.16532900   | H |
| O | -1 | 7.70821100   | 10.96170600 | 3.86853800  | L | O  | -1          | 7.70821100   | 10.96170600   | L |
| H | -1 | 8.54406000   | 0.76550300  | -6.02056000 | L | H  | -1          | 8.54406000   | 0.76550300    | L |
| H | -1 | 7.62468600   | -7.13558600 | 1.26936600  | L | H  | -1          | 7.62468600   | -7.13558600   | L |
| H | -1 | 0.94976400   | -8.20216000 | 0.52932000  | L | H  | -1          | 0.94976400   | -8.20216000   | L |
| H | -1 | -2.71579900  | -7.76449800 | 3.76063300  | L | H  | -1          | -2.71579900  | -7.76449800   | L |
| H | -1 | -10.39939000 | -1.94366200 | 3.72049500  | L | H  | -1          | -10.39939000 | -1.94366200   | L |
| H | -1 | -10.02615700 | 7.14372600  | -3.28032600 | L | H  | -1          | -10.02615700 | 7.14372600    | L |
| H | -1 | 5.69923200   | 11.18326400 | 3.55227600  | L | H  | -1          | 5.69923200   | 11.18326400   | L |
| H | -1 | -1.83550700  | 6.80674300  | -4.84431000 | L | H  | -1          | -1.83550700  | 6.80674300    | L |
| H | -1 | 5.55068500   | -0.90267300 | 5.45136300  | L | H  | -1          | 5.55068500   | -0.90267300   | L |
| H | -1 | 4.22146300   | -7.49140300 | -4.01918500 | L | H  | -1          | 4.22146300   | -7.49140300   | L |
| H | -1 | -6.59293500  | -6.12232400 | -4.73112900 | L | H  | -1          | -6.59293500  | -6.12232400   | L |
| H | -1 | 1.53262600   | -1.99311800 | 7.45680600  | L | H  | -1          | 1.53262600   | -1.99311800   | L |
| H | -1 | -5.95901200  | -5.45586200 | 6.66259000  | L | H  | -1          | -5.95901200  | -5.45586200</ |   |

|   |    |              |             |             |         |   |    |             |             |             |         |
|---|----|--------------|-------------|-------------|---------|---|----|-------------|-------------|-------------|---------|
| C | 0  | 2.52064000   | 3.21780100  | 4.64726900  | H       | O | 0  | -4.20990600 | -0.78278100 | 0.31418800  | H       |
| C | 0  | 2.77432700   | 2.51181500  | 3.27683400  | H       | C | -1 | -8.43574400 | -3.49832700 | 0.29537200  | L       |
| O | 0  | 3.91676700   | 2.05741700  | 3.10702000  | H       | O | -1 | -8.87317900 | -2.87006300 | 1.29412600  | L       |
| O | 0  | 1.79211100   | 2.46703400  | 2.45024500  | H       | N | -1 | -9.60351000 | -4.97761800 | -5.17769300 | L       |
| C | -1 | 1.43488900   | 1.34326600  | 5.93810500  | L       | C | -1 | -8.19304500 | -4.79224400 | -5.51700400 | L       |
| O | -1 | 0.38604700   | 1.82468700  | 6.39576300  | L       | C | -1 | -7.85467700 | -3.31753000 | -5.66212500 | L       |
| N | -1 | 1.57585300   | 0.07706800  | 5.54999700  | L       | C | -1 | -6.42554900 | -3.10817100 | -6.14703100 | L H 144 |
| C | -1 | 0.53510500   | -0.95359100 | 5.68702800  | L       | C | 0  | -6.10279600 | -1.67028700 | -6.55068400 | H       |
| C | -1 | 0.66107900   | -2.01536200 | 4.56153900  | L       | N | 0  | -6.17903700 | -0.68731000 | -5.47305600 | H       |
| C | -1 | -0.36564500  | -3.11618800 | 4.73258200  | L       | C | 0  | -5.22274000 | -0.43354900 | -4.52761200 | H       |
| C | -1 | 0.46478900   | -1.35728600 | 3.19553700  | L       | N | 0  | -4.01630000 | -0.98405700 | -4.55832300 | H       |
| C | -1 | 0.60588900   | -1.67733600 | 7.04195400  | L       | N | 0  | -5.53578100 | 0.41852200  | -3.54844400 | H       |
| O | -1 | -0.45200900  | -1.94197000 | 7.66996000  | L       | C | -1 | -7.31949200 | -5.43095800 | -4.41883900 | L       |
| N | -1 | 9.56022900   | -1.43009700 | -3.75388200 | L       | O | -1 | -7.48659900 | -5.10730500 | -3.21430700 | L       |
| C | -1 | 8.47897800   | -0.63272000 | -4.29772700 | L H 175 | N | -1 | -4.43360300 | -9.64989600 | 1.55737300  | L       |
| C | 0  | 7.50984300   | -0.11824100 | -3.21761800 | H       | C | -1 | -3.78636300 | -8.38667300 | 1.91584300  | L       |
| C | 0  | 6.40917100   | 0.78661100  | -3.77909700 | H       | C | -1 | -4.63416600 | -7.21162900 | 1.38499000  | L       |
| C | 0  | 5.12539600   | 0.29508200  | -4.04152900 | H       | C | -1 | -3.80471000 | -5.96836100 | 1.14083800  | L       |
| C | 0  | 4.09051000   | 1.12087200  | -4.48705400 | H       | C | -1 | -2.98799000 | -5.84739100 | 0.00460600  | L       |
| C | 0  | 4.30971200   | 2.49291000  | -4.65991800 | H       | C | -1 | -2.19003300 | -4.74614500 | -0.18470700 | L       |
| O | 0  | 3.33370600   | 3.36356600  | -5.05708400 | H       | C | -1 | -2.19183700 | -3.74134900 | 0.74971800  | L       |
| C | 0  | 5.59362000   | 3.00275400  | -4.41876200 | H       | O | -1 | -1.40297000 | -2.64786100 | 0.57549400  | L       |
| C | 0  | 6.61407300   | 2.16261800  | -3.97994900 | H       | C | -1 | -2.98205000 | -3.83767400 | 1.88271800  | L       |
| C | -1 | 8.98934800   | 0.57244000  | -5.09998400 | L       | C | -1 | -3.79473400 | -4.94341600 | 2.05151800  | L       |
| O | -1 | 9.92202400   | 1.28304400  | -4.64310900 | L       | C | -1 | -3.54534200 | -8.27127800 | 3.42505000  | L       |
| N | -1 | 7.97879200   | 10.32973600 | 1.13347300  | L       | O | -1 | -4.39025700 | -8.73458600 | 4.23439300  | L       |
| C | -1 | 6.67728600   | 10.14614800 | 1.79158400  | L       | N | -1 | -3.30541100 | -5.45557800 | 5.46543800  | L       |
| C | -1 | 6.32715200   | 8.66663500  | 1.93003900  | L       | C | -1 | -3.94277000 | -4.37803000 | 6.20611900  | L       |
| C | -1 | 5.82259000   | 8.09325300  | 0.64978300  | L       | C | -1 | -4.30923700 | -3.20322200 | 5.27490700  | L       |
| C | -1 | 6.02303500   | 8.60136700  | -0.62347600 | L       | C | -1 | -4.08515400 | -1.86538600 | 5.93751100  | L H 85  |
| N | -1 | 5.39584500   | 7.83004200  | -1.54864100 | L       | C | 0  | -4.62685000 | -0.68255200 | 5.13813900  | H       |
| C | -1 | 4.78409100   | 6.77203800  | -0.91169300 | L       | N | 0  | -3.98891400 | -0.53229100 | 3.83545600  | H       |
| C | -1 | 5.04157500   | 6.89993200  | 0.47444900  | L       | C | 0  | -2.97111000 | 0.29120800  | 3.52944700  | H       |
| C | -1 | 4.49565200   | 5.95014000  | 1.35741000  | L       | N | 0  | -2.29978400 | 0.97272700  | 4.49661000  | H       |
| C | -1 | 3.74530100   | 4.91758100  | 0.82349900  | L       | N | 0  | -2.68703800 | 0.49624900  | 2.25105200  | H       |
| C | -1 | 3.53006100   | 4.79386200  | -0.55230700 | L       | C | -1 | -5.14202800 | -4.76826200 | 7.07836900  | L       |
| C | -1 | 4.03095800   | 5.71856000  | -1.44108700 | L       | O | -1 | -5.26247400 | -4.28650400 | 8.23460900  | L       |
| C | -1 | 6.61234000   | 10.87230700 | 3.13225600  | L       | C | 0  | 0.53753400  | -0.53790200 | -2.98900700 | H       |
| N | 0  | 0.07373300   | 6.53755100  | 2.70025300  | H       | O | 0  | 0.75599400  | -0.26106500 | -4.34440500 | H       |
| C | 0  | -0.26718800  | 5.20410700  | 2.19408300  | H       | C | 0  | 1.65832800  | 0.07150400  | -2.09338100 | H       |
| C | 0  | -0.82069800  | 4.34287600  | 3.38243000  | H       | O | 0  | 2.76997800  | -0.79484000 | -2.08491900 | H       |
| O | 0  | -0.70248000  | 2.96168100  | 3.12956400  | H       | O | 0  | -0.79304000 | -0.03498500 | -2.73634500 | H       |
| C | 0  | -2.28363100  | 4.61661700  | 3.72390500  | H       | C | 0  | -1.17055500 | 0.32573200  | -1.42214600 | H       |
| C | 0  | -1.20998100  | 5.13139200  | 0.97970800  | H       | C | 0  | -0.12637600 | 1.19867400  | -0.71910500 | H       |
| O | 0  | -1.38079500  | 4.07746400  | 0.36724700  | H       | O | 0  | -0.56544400 | 1.46618700  | 0.62126600  | H       |
| N | 0  | -1.86189200  | 6.29218200  | 0.65793100  | H       | C | 0  | 1.23803300  | 0.52011900  | -0.68482200 | H       |
| C | -1 | -2.87088500  | 6.37835300  | -0.46021900 | L H 88  | O | 0  | 2.21704000  | 1.44946200  | -0.23048200 | H       |
| C | -1 | -3.98041300  | 7.36221500  | -0.08478400 | L       | C | 0  | -2.47321100 | 1.08400000  | -1.59796400 | H       |
| C | -1 | -4.75581600  | 6.93397200  | 1.16795400  | L       | O | 0  | -3.53780900 | 0.17780800  | -1.98508200 | H       |
| C | -1 | -4.31946200  | 7.29031000  | 2.43616300  | L       | H | -1 | 2.63878100  | -5.90241500 | 0.25783600  | L       |
| C | -1 | -5.01459500  | 6.90265300  | 3.57879000  | L       | H | -1 | 3.17707700  | -5.07394300 | 1.72647100  | L       |
| C | -1 | -6.16206800  | 6.14078700  | 3.44583800  | L       | H | 0  | 0.22443500  | -4.95347000 | 0.84971000  | H       |
| O | -1 | -6.86424200  | 5.75657300  | 4.58371300  | L       | H | 0  | 1.09054400  | -3.88799700 | 2.00144800  | H       |
| C | -1 | -6.62017900  | 5.78692800  | 2.19818300  | L       | H | -1 | 1.61745400  | -6.49283800 | 3.13734600  | L       |
| C | -1 | -5.90464500  | 6.17629900  | 1.06361300  | L       | H | -1 | 3.41878700  | -7.92287900 | 1.30667200  | L       |
| C | -1 | -2.10008200  | 6.81453600  | -1.70508500 | L       | H | -1 | 3.81310900  | -7.20117300 | 2.73133800  | L       |
| O | -1 | -2.13595600  | 7.99154300  | -2.10531700 | L       | H | -1 | 1.69816400  | -5.00759000 | -3.00711400 | L       |
| N | -1 | -1.41630800  | 5.84901600  | -2.31905200 | L       | H | -1 | 2.61460000  | -4.08190100 | -4.20465900 | L       |
| C | -1 | -0.34756400  | 6.11906700  | -3.31522900 | L H 102 | H | -1 | 1.20981500  | -4.69857300 | -6.76212500 | L       |
| C | 0  | 0.54519300   | 4.86939500  | -3.42906500 | H       | H | -1 | -0.36872700 | -4.00660000 | -2.82288200 | L       |
| C | 0  | -0.11671000  | 3.56703100  | -4.01577400 | H       | H | -1 | -0.89010400 | -3.87808900 | -7.74816100 | L       |
| O | 0  | -1.37229000  | 3.47139300  | -4.07320300 | H       | H | -1 | -2.45205700 | -3.17055500 | -3.78332200 | L       |
| O | 0  | 0.71967000   | 2.67855000  | -4.35057800 | H       | H | -1 | -2.93423000 | -3.04538400 | -7.28151800 | L       |
| C | -1 | -0.82911100  | 6.57217600  | -4.68225200 | L       | H | -1 | 3.03002000  | -5.96334700 | -5.62633600 | L       |
| O | -1 | 0.01265700   | 6.69768100  | -5.60920400 | L       | H | -1 | 1.89501600  | -8.04250900 | -5.25190200 | L       |
| N | -1 | -8.89812900  | 5.73602300  | -5.31925700 | L       | H | -1 | 0.90441200  | -7.34958000 | -4.15168100 | L       |
| C | -1 | -8.71245700  | 5.36216300  | -3.90582000 | L       | H | -1 | 5.61498300  | -4.74097200 | -0.29079400 | L       |
| C | -1 | -7.29082600  | 5.65991300  | -3.45812400 | L       | H | -1 | 7.33829500  | -4.33631700 | -0.30447700 | L       |
| C | -1 | -6.27358900  | 4.70197500  | -4.07115400 | L       | H | -1 | 8.41610000  | -5.09610200 | -2.80446300 | L       |
| C | -1 | -4.86022800  | 4.97982700  | -3.64372400 | L       | H | -1 | 4.47365400  | -3.54638000 | -1.99099800 | L       |
| O | -1 | -4.52913200  | 6.08543400  | -3.19546200 | L       | H | -1 | 8.25765400  | -4.31009200 | -5.12757000 | L       |
| N | -1 | -3.99625400  | 3.97042500  | -3.78049100 | L       | H | -1 | 4.31408900  | -2.75431000 | -4.33467100 | L       |
| C | -1 | -9.73443100  | 6.06436300  | -3.00648000 | L       | H | -1 | 7.09430100  | -3.19927100 | -6.51942400 | L       |
| O | -1 | -10.17215800 | 5.48414400  | -1.97919600 | L       | H | -1 | 7.95591100  | -6.59591700 | -1.15992900 | L       |
| N | -1 | -11.28736200 | 0.64812500  | 2.15926400  | L       | H | -1 | 6.06610500  | -6.85181600 | -2.57516700 | L       |
| C | -1 | -10.10253200 | -0.12588200 | 2.49887800  | L       | H | -1 | 5.05834100  | -7.08436800 | -1.30892300 | L       |
| C | -1 | -8.87142800  | 0.76397500  | 2.69201100  | L       | H | -1 | 3.42654900  | -2.99053400 | 3.18486900  | L       |
| C | -1 | -8.25234600  | 1.24347900  | 1.40244400  | L       | H | -1 | 3.35773200  | -1.06745000 | 1.53904200  | L       |
| C | -1 | -8.82669100  | 1.23324900  | 0.15342700  | L       | H | -1 | 5.00969300  | -0.59509800 | 2.02038900  | L       |
| N | -1 | -7.95836200  | 1.79104500  | -0.76307800 | L       | H | -1 | 3.68497900  | -0.49018400 | 3.17849900  | L       |
| C | -1 | -6.81487900  | 2.18665600  | -0.11864900 | L       | H | -1 | 4.14692100  | -3.32064200 | 1.08623900  | L       |
| C | -1 | -6.95938900  | 1.84921300  | 1.24507700  | L       | H | -1 | 6.37954400  | -2.06107200 | 3.51103100  | L       |
| C | -1 | -5.91900000  | 2.13571100  | 2.12685000  | L       | H | -1 | 5.05028500  | -4.55657800 | 3.95258200  | L       |
| C | -1 | -4.76449400  | 2.71543200  | 1.64189100  | L       | H | -1 | 6.62670500  | -4.15853400 | 4.02561200  | L       |
| C | -1 | -4.63039300  | 3.02444700  | 0.25867100  | L       | H | 0  | 1.52407800  | 3.69468600  | 4.68944500  | H       |
| C | -1 | -5.65472000  | 2.77442900  | -0.62087500 | L       | H | 0  | 3.27431200  | 4.02577200  | 4.72863700  | H       |
| C | -1 | -10.43708200 | -0.90528200 | 3.75527000  | L       | H | -1 | 2.71457000  | 2.86918700  | 6.76190700  | L       |
| O | -1 | -10.80858700 | -0.29740800 | 4.79259600  | L       | H | -1 | 4.28386900  | 1.44607500  | 4.82029200  | L       |
| N | -1 | -7.25965800  | -5.65498500 | 0.00425400  | L       | H | -1 | 4.57747500  | 1.76152800  | 6.40818800  | L       |
| C | -1 | -7.09239000  | -4.25047500 | 0.38530300  | L       | H | -1 | 1.68335800  | -2.47363500 | 4.60133300  | L       |
| C | -1 | -6.07676700  | -3.56765200 | -0.54218600 | L H 134 | H | -1 | -0.29480200 | -3.84860200 | 3.91440500  | L       |
| C | 0  | -6.07395500  | -2.05053200 | -0.46798500 | H       | H | -1 | -1.39434100 | -2.72093000 | 4.72376400  | L       |
| C | 0  | -5.19307200  | -1.50465400 | 0.67895100  | H       | H | -1 | -0.23527000 | -3.67196700 | 5.67330800  | L       |
| O | 0  | -5.50717500  | -1.78234000 | 1.85507200  | H       | H | -1 | 0.58243800  | -2.12251000 | 2.40305400  | L       |

|                                              |    |              |             |             |       |   |    |              |             |             |         |
|----------------------------------------------|----|--------------|-------------|-------------|-------|---|----|--------------|-------------|-------------|---------|
| H                                            | -1 | -0.53801300  | -0.92662300 | 3.08649800  | L     | H | -1 | -2.78816300  | -8.38333200 | 1.40889700  | L       |
| H                                            | -1 | 1.19701700   | -0.56459100 | 2.97959100  | L     | H | -1 | -4.61680300  | -9.66413300 | 0.57474100  | L       |
| H                                            | -1 | -0.47090300  | -0.46346200 | 5.59267800  | L     | H | -1 | -5.29387900  | -9.76042400 | 2.05315600  | L       |
| H                                            | -1 | 2.33697000   | -0.16229900 | 4.94363800  | L     | H | -1 | -5.36787500  | -3.29984100 | 4.95117400  | L       |
| H                                            | 0  | 7.05393400   | -0.98456200 | -2.70518300 | H     | H | -1 | -3.72252200  | -3.24349100 | 4.31570500  | L       |
| H                                            | 0  | 8.07966800   | 0.41569100  | -2.43333900 | H     | H | -1 | -4.52390400  | -1.86873700 | 6.95785400  | L       |
| H                                            | 0  | 4.89858900   | -0.75336500 | -3.85471000 | H     | H | -1 | -2.99604800  | -1.69620300 | 6.09628300  | L       |
| H                                            | 0  | 7.58884600   | 2.59462800  | -3.74913400 | H     | H | 0  | -5.70975700  | -0.80837900 | 4.94929600  | H       |
| H                                            | 0  | 3.10600900   | 0.69538700  | -4.65704800 | H     | H | 0  | -4.49631800  | 0.25632900  | 5.70903700  | H       |
| H                                            | 0  | 5.75749700   | 4.07324600  | -4.52911300 | H     | H | 0  | -4.44870300  | -1.03279300 | 3.04830100  | H       |
| H                                            | 0  | 2.43379800   | 3.01435000  | -4.82947700 | H     | H | 0  | -3.26162600  | 0.02811700  | 1.52955100  | H       |
| H                                            | -1 | 7.92507800   | -1.29979900 | -5.00888700 | L     | H | 0  | -1.79180400  | 0.88124400  | 1.92944800  | H       |
| H                                            | -1 | 10.29328600  | -1.50229200 | -4.42853100 | L     | H | 0  | -2.03037200  | 0.46309800  | 5.33543200  | H       |
| H                                            | -1 | 9.91777100   | -1.06153500 | -2.89635100 | L     | H | 0  | -1.60255600  | 1.64868000  | 4.15050500  | H       |
| H                                            | -1 | 7.19918300   | 8.07462500  | 2.27779800  | L     | H | -1 | -3.14262500  | -3.91983000 | 6.86621200  | L       |
| H                                            | -1 | 5.54777200   | 8.53744500  | 2.70900900  | L     | H | -1 | -3.61860600  | -5.40516300 | 4.51462900  | L       |
| H                                            | -1 | 6.58802900   | 9.49772500  | -0.89553800 | L     | H | -1 | -2.19198900  | -4.79979900 | 5.67026200  | L       |
| H                                            | -1 | 5.57235900   | 7.86173700  | -2.52036200 | L     | H | 0  | 0.54470300   | -1.62049600 | -2.85505500 | H       |
| H                                            | -1 | 4.66246400   | 6.03821900  | 2.43503500  | L     | H | 0  | 0.64698500   | 0.71706700  | -4.43429400 | H       |
| H                                            | -1 | 3.30205200   | 4.16976500  | 1.49593500  | L     | H | 0  | 1.98538900   | 0.98653900  | -2.60088100 | H       |
| H                                            | -1 | 3.86481200   | 5.59619500  | -2.52165100 | L     | H | 0  | 2.64916500   | -1.52263400 | -1.42637100 | H       |
| H                                            | -1 | 2.93133400   | 3.94911700  | -0.92252100 | L     | H | 0  | -1.33954000  | -0.57049100 | -0.80087800 | H       |
| H                                            | -1 | 5.92060100   | 10.63780500 | 1.12628500  | L     | H | 0  | -0.62370000  | 2.14459300  | -1.26386500 | H       |
| H                                            | -1 | 8.69556400   | 9.84411100  | 1.63203600  | L     | H | 0  | -0.70867500  | 2.42815900  | 0.71128200  | H       |
| H                                            | -1 | 8.20140200   | 11.30266500 | 1.09934900  | L     | H | 0  | 1.18261200   | -0.35334100 | -0.01682300 | H       |
| H                                            | 0  | -0.19340000  | 4.64576400  | 4.23475600  | H     | H | 0  | 2.09682700   | 1.64663800  | 0.73042400  | H       |
| H                                            | 0  | -2.54988300  | 4.09450700  | 4.64974400  | H     | H | 0  | -2.35003200  | 1.81395600  | -2.40369000 | H       |
| H                                            | 0  | -2.93506500  | 4.23361600  | 2.92455300  | H     | H | 0  | -2.75852300  | 1.59555600  | -0.67109000 | H       |
| H                                            | 0  | -2.49234400  | 5.68785000  | 3.86451300  | H     | H | 0  | -3.81807000  | -0.31135600 | -1.14198800 | H       |
| H                                            | 0  | 0.26802200   | 2.73741900  | 2.92119600  | H     | O | -1 | 7.65847800   | 11.03026400 | 3.81359300  | L       |
| H                                            | 0  | 0.66719400   | 4.71796900  | 1.89175300  | H     | H | -1 | 8.52646000   | 0.82405300  | -6.06240400 | L       |
| H                                            | 0  | 0.54795700   | 7.10030400  | 1.99897800  | H     | H | -1 | 7.69063000   | -7.07137300 | 1.24369800  | L       |
| H                                            | 0  | -0.73641500  | 7.04494900  | 3.04986700  | H     | H | -1 | 1.02043900   | -8.18550200 | 0.53159400  | L       |
| H                                            | -1 | -4.68248100  | 7.44551800  | -0.93904400 | L     | H | -1 | -2.63538900  | -7.76806800 | 3.77658300  | L       |
| H                                            | -1 | -3.57608600  | 8.38393600  | 0.06850300  | L     | H | -1 | -10.35937400 | -2.00083300 | 3.75733700  | L       |
| H                                            | -1 | -3.39203700  | 7.87245400  | 2.54116700  | L     | H | -1 | -10.07678700 | 7.07753600  | -3.25941300 | L       |
| H                                            | -1 | -6.26671000  | 5.86864500  | 0.07288100  | L     | H | -1 | 5.64678200   | 11.23734400 | 3.50487400  | L       |
| H                                            | -1 | -4.64630100  | 7.19030700  | 4.57043300  | L     | H | -1 | -1.89018100  | 6.79493300  | -4.85503100 | L       |
| H                                            | -1 | -7.52747500  | 5.18195700  | 2.06910800  | L     | H | -1 | 5.58973500   | -0.84623000 | 5.42384500  | L       |
| H                                            | -1 | -7.61415300  | 5.25441200  | 4.29069100  | L     | H | -1 | 4.26926700   | -7.45942400 | -4.03086300 | L       |
| H                                            | -1 | -3.32421400  | 5.34927900  | -0.57405300 | L     | H | -1 | -6.55709800  | -6.16667900 | -4.70249100 | L       |
| H                                            | 0  | -1.62200800  | 7.14208400  | 1.15908300  | H     | H | -1 | 1.58724700   | -1.96130600 | 7.44680400  | L       |
| H                                            | 0  | 1.44380600   | 5.09114000  | -4.03918500 | H     | H | -1 | -5.88318300  | -5.47730800 | 6.68756900  | L       |
| H                                            | 0  | 0.95568300   | 4.59100200  | -2.43399700 | H     | H | -1 | -9.00559200  | -3.51266200 | -0.64437100 | L       |
| H                                            | -1 | 0.24997800   | 6.97723300  | -2.90944600 | L     | N | -1 | 10.00162100  | 2.13411500  | 2.53199500  | L       |
| H                                            | -1 | -1.90552400  | 4.97717000  | -2.45779500 | L     | C | -1 | 8.63821700   | 1.62417000  | 2.25359600  | L H 371 |
| H                                            | -1 | -7.23108900  | 5.59130900  | -2.35024200 | L     | C | 0  | 8.21769200   | 1.70802700  | 0.77654800  | H       |
| H                                            | -1 | -7.00879800  | 6.70795900  | -3.69568100 | L     | C | -1 | 8.55916000   | 0.13319600  | 2.68513500  | L       |
| H                                            | -1 | -6.56827600  | 3.65870300  | -3.81839800 | L     | O | -1 | 7.54520300   | -0.28742000 | 3.24088600  | L       |
| H                                            | -1 | -6.32673000  | 4.76585500  | -5.17827400 | L     | N | -1 | 9.57813300   | -0.64459500 | 2.33009200  | L       |
| H                                            | -1 | -4.26877100  | 3.20775300  | -4.35470500 | L     | C | -1 | 9.57270000   | -2.07799100 | 2.53589500  | L H 376 |
| H                                            | -1 | -2.98314900  | 4.06184300  | -3.64395900 | L     | C | 0  | 8.85603000   | -2.85348800 | 1.41293600  | H       |
| H                                            | -1 | -8.88927100  | 4.25711600  | -3.85377400 | L     | C | 0  | 9.55251100   | -2.67726100 | -0.01545900 | H       |
| H                                            | -1 | -9.84961200  | 5.59065400  | -5.58420400 | L     | O | 0  | 10.06888600  | -3.71995900 | -0.47821700 | H       |
| H                                            | -1 | -8.65669100  | 6.69487800  | -5.46321500 | L     | O | 0  | 9.49135800   | -1.51698800 | -0.49815400 | H       |
| H                                            | -1 | -8.09613100  | 0.19226700  | 3.24298200  | L     | C | -1 | 10.97368100  | -2.65082700 | 2.66452700  | L       |
| H                                            | -1 | -9.10572500  | 1.64665500  | 3.32212600  | L     | O | -1 | 11.97437200  | -1.92423300 | 2.43161600  | L       |
| H                                            | -1 | -9.83366200  | 0.90244100  | -0.11451400 | L     | H | 0  | 9.03492700   | 1.34525200  | 0.12185000  | H       |
| H                                            | -1 | -8.00376400  | 1.61461900  | -1.73473400 | L     | H | 0  | 7.98878300   | 2.75448500  | 0.49528100  | H       |
| H                                            | -1 | -6.02892100  | 1.89234200  | 3.18932600  | L     | H | -1 | 7.88035400   | 2.18627400  | 2.85723700  | L       |
| H                                            | -1 | -3.94019500  | 2.99342500  | 2.31750200  | L     | H | -1 | 10.46407200  | 2.43227600  | 1.69808100  | L       |
| H                                            | -1 | -5.56215500  | 3.02625200  | -1.68436200 | L     | H | -1 | 9.95086800   | 2.89680300  | 3.17172900  | L       |
| H                                            | -1 | -3.69955100  | 3.50163100  | -0.09082900 | L     | H | 0  | 8.82885000   | -3.93403700 | 1.66597100  | H       |
| H                                            | -1 | -9.91490900  | -0.83244200 | 1.65249300  | L     | H | 0  | 7.80532900   | -2.50113700 | 1.34178300  | H       |
| H                                            | -1 | -12.08750900 | 0.05041900  | 2.12494000  | L     | H | -1 | 9.03098800   | -2.30623800 | 3.49134000  | L       |
| H                                            | -1 | -11.44496900 | 1.37538400  | 2.82708200  | L     | H | -1 | 10.25662900  | -0.29898700 | 1.68146700  | L       |
| H                                            | -1 | -6.31286300  | -3.81743300 | -1.59765800 | L     | H | -1 | 11.08361100  | -3.70729400 | 2.93723800  | L       |
| H                                            | -1 | -5.06364800  | -3.97495300 | -0.33594100 | L     | C | 0  | 6.95984800   | 0.84801700  | 0.49758900  | H       |
| H                                            | 0  | -5.70381800  | -1.63574500 | -1.42065400 | H     | C | 0  | 5.86710100   | 1.54194900  | -0.28529200 | H       |
| H                                            | 0  | -7.09763900  | -1.65060600 | -0.31834400 | H     | O | 0  | 5.88198800   | 2.69882700  | -0.66203600 | H       |
| H                                            | -1 | -6.71263900  | -4.23816400 | 1.43937600  | L     | H | 0  | 6.42619000   | 0.52010000  | 1.41199900  | H       |
| H                                            | -1 | -6.60869400  | -5.92139900 | -0.70743500 | L     | H | 0  | 7.24915200   | -0.07714200 | -0.01386200 | H       |
| H                                            | -1 | -8.18636000  | -5.82590100 | -0.33036400 | L     | O | 0  | 4.85640600   | 0.68425900  | -0.45151400 | H       |
| H                                            | -1 | -8.55522900  | -2.83778700 | -6.37889200 | L     | H | 0  | 4.01320500   | 1.12440500  | -0.70758900 | H       |
| H                                            | -1 | -8.01082200  | -2.78958000 | -4.69767400 | L     |   |    |              |             |             |         |
| H                                            | -1 | -6.24057800  | -3.73631900 | -7.04336800 | L     |   |    |              |             |             |         |
| H                                            | -1 | -5.70615200  | -3.47567900 | -5.38528000 | L     |   |    |              |             |             |         |
| H                                            | 0  | -6.79667400  | -1.32792400 | -7.33996900 | H     |   |    |              |             |             |         |
| H                                            | 0  | -5.09354300  | -1.61113400 | -6.99544200 | H     |   |    |              |             |             |         |
| H                                            | 0  | -7.11433800  | -0.47922400 | -5.15025000 | H     |   |    |              |             |             |         |
| H                                            | 0  | -3.73525600  | -1.73353300 | -5.19979700 | H     |   |    |              |             |             |         |
| H                                            | 0  | -3.34261000  | -0.70146700 | -3.82722100 | H     |   |    |              |             |             |         |
| H                                            | 0  | -6.30455200  | 1.06220700  | -3.67520600 | H     |   |    |              |             |             |         |
| H                                            | 0  | -4.79277100  | 0.56411300  | -2.78486100 | H     |   |    |              |             |             |         |
| H                                            | -1 | -8.00914800  | -5.32913200 | -6.48027400 | L     |   |    |              |             |             |         |
| H                                            | -1 | -10.17911500 | -4.59305200 | -5.89702000 | L     |   |    |              |             |             |         |
| H                                            | -1 | -9.82091200  | -4.54241200 | -4.30527000 | L     |   |    |              |             |             |         |
| H                                            | -1 | -5.11943800  | -7.48433100 | 0.42376200  | L     |   |    |              |             |             |         |
| H                                            | -1 | -5.46117900  | -6.97723500 | 2.08463700  | L     |   |    |              |             |             |         |
| H                                            | -1 | -2.98169200  | -6.66156400 | -0.72938900 | L     |   |    |              |             |             |         |
| H                                            | -1 | -4.32806200  | -4.60643100 | 2.97596500  | L     |   |    |              |             |             |         |
| H                                            | -1 | -1.57142100  | -4.67780600 | -1.09289900 | L     |   |    |              |             |             |         |
| H                                            | -1 | -3.02041200  | -3.03158600 | 2.63579600  | L     |   |    |              |             |             |         |
| H                                            | -1 | -0.94729400  | -2.72140400 | -0.26452600 | L     |   |    |              |             |             |         |
| Glc_E777A                                    |    |              |             |             |       |   |    |              |             |             |         |
| ONIOM: extrapolated energy = -3124.119815 au |    |              |             |             |       |   |    |              |             |             |         |
| N                                            | -1 | 3.13819600   | -7.58494600 | 2.27673300  | L     |   |    |              |             |             |         |
| C                                            | -1 | 1.95844700   | -6.75571100 | 2.17003400  | L     |   |    |              |             |             |         |
| C                                            | -1 | 2.29258300   | -5.51467200 | 1.29919800  | L H 4 |   |    |              |             |             |         |
| C                                            | 0  | 1.19835700   | -4.48314500 | 1.11456600  | H     |   |    |              |             |             |         |
| C                                            | 0  | 1.53945800   | -3.46208800 | -0.02705900 | H     |   |    |              |             |             |         |
| O                                            | 0  | 2.70656900   | -2.97985900 | -0.05269400 | H     |   |    |              |             |             |         |
| O                                            | 0  | 0.59212200   | -3.15573500 | -0.81546800 | H     |   |    |              |             |             |         |
| C                                            | -1 | 0.83576400   | -7.54475600 | 1.48430000  | L     |   |    |              |             |             |         |
| O                                            | -1 | -0.34486200  | -7.45933600 | 1.91137600  | L     |   |    |              |             |             |         |
| N                                            | -1 | 1.47275900   | -7.24033400 | -4.88645700 | L     |   |    |              |             |             |         |

|   |    |             |             |             |   |   |    |              |             |             |   |
|---|----|-------------|-------------|-------------|---|---|----|--------------|-------------|-------------|---|
| C | -1 | -1.88358100 | -3.59790000 | -5.78952800 | L | C | -1 | -7.52360300  | 5.45883700  | -3.50730200 | L |
| O | -1 | -3.08239100 | -3.16357900 | -6.29465300 | L | C | -1 | -6.49207500  | 4.51199200  | -4.11364800 | L |
| C | -1 | -1.72477500 | -3.62335000 | -4.41674700 | L | C | -1 | -5.08178700  | 4.82175700  | -3.69817600 | L |
| C | -1 | -0.53092300 | -4.06561100 | -3.87891600 | L | O | -1 | -4.76892400  | 5.93917400  | -3.26640400 | L |
| C | -1 | 3.43821800  | -6.83262900 | -3.62024500 | L | N | -1 | -4.19987800  | 3.82690600  | -3.82661300 | L |
| O | -1 | 3.24999300  | -6.66784200 | -2.38696100 | L | C | -1 | -9.97177800  | 5.82363000  | -3.04671800 | L |
| N | -1 | 6.01647300  | -7.10913800 | -1.59112100 | L | O | -1 | -10.39281100 | 5.24899700  | -2.00936600 | L |
| C | -1 | 6.92051000  | -6.31399300 | -0.76775800 | L | N | -1 | -11.39415000 | 0.44820900  | 2.19864700  | L |
| C | -1 | 6.54099400  | -4.83800700 | -0.82945800 | L | C | -1 | -10.19316300 | -0.29902900 | 2.54145200  | L |
| C | -1 | 6.40865800  | -4.32748600 | -2.24069600 | L | C | -1 | -8.97785800  | 0.61608700  | 2.71568700  | L |
| C | -1 | 7.45064000  | -4.53202200 | -3.15171800 | L | C | -1 | -8.37509000  | 1.08994100  | 1.41634100  | L |
| C | -1 | 7.34709700  | -4.10750900 | -4.45586900 | L | C | -1 | -8.95613200  | 1.05249000  | 0.17094600  | L |
| C | -1 | 6.19337500  | -3.48348400 | -4.86159000 | L | N | -1 | -8.10353900  | 1.61419400  | -0.75786300 | L |
| O | -1 | 6.14031300  | -3.06086400 | -6.16322500 | L | C | -1 | -6.96406300  | 2.03953100  | -0.12537900 | L |
| C | -1 | 5.13984300  | -3.26713800 | -4.00089300 | L | C | -1 | -7.09459200  | 1.71752400  | 1.24347900  | L |
| C | -1 | 5.24869300  | -3.69136300 | -2.68093700 | L | C | -1 | -6.05482000  | 2.03499500  | 2.11531500  | L |
| C | -1 | 6.80831500  | -6.75771000 | 0.68644100  | L | C | -1 | -4.91409300  | 2.62965800  | 1.61604500  | L |
| O | -1 | 5.67527500  | -6.90218200 | 1.21457000  | L | C | -1 | -4.79355200  | 2.92279400  | 0.22813100  | L |
| N | -1 | 5.69581200  | -3.75391100 | 4.31992700  | L | C | -1 | -5.81793500  | 2.64212100  | -0.64205300 | L |
| C | -1 | 5.39411200  | -2.40729200 | 3.88670300  | L | C | -1 | -10.50603000 | -1.06783800 | 3.80989800  | L |
| C | -1 | 4.33611200  | -2.42079500 | 2.80911700  | L | O | -1 | -10.88302300 | -0.45332100 | 4.84131400  | L |
| O | -1 | 4.82276000  | -3.21034700 | 1.71488300  | L | N | -1 | -7.26138000  | -5.80672400 | 0.10300900  | L |
| C | -1 | 4.01767800  | -1.01005800 | 2.32870700  | L | C | -1 | -7.11828200  | -4.39442300 | 0.46461000  | L |
| C | -1 | 4.92531200  | -1.55546000 | 5.07914300  | L | C | -1 | -6.12082600  | -3.70512600 | -0.47768300 | L |
| O | -1 | 3.86894500  | -1.85851000 | 5.69218300  | L | C | -1 | -8.47595400  | -3.66868900 | 0.37267700  | L |
| N | -1 | 3.79998500  | 1.54267800  | 5.70219200  | L | O | -1 | -8.91946100  | -3.03552700 | 1.36564200  | L |
| C | -1 | 2.56386000  | 2.36248600  | 5.76415100  | L | N | -1 | -9.64649200  | -5.24175200 | -5.07358200 | L |
| C | 0  | 2.37873600  | 3.32383000  | 4.58711000  | H | C | -1 | -8.24166500  | -5.03463600 | -5.42354100 | L |
| C | 0  | 2.57428200  | 2.60594500  | 3.22563000  | H | C | -1 | -7.93176200  | -3.55592400 | -5.58997700 | L |
| O | 0  | 3.71713500  | 2.19232200  | 2.97473300  | H | C | -1 | -6.50953900  | -3.32640800 | -6.08593900 | L |
| O | 0  | 1.53691900  | 2.49012100  | 2.47007000  | H | C | 0  | -6.23392900  | -1.89307100 | -6.53025300 | H |
| C | -1 | 1.33384700  | 1.43018400  | 5.89356000  | L | N | 0  | -6.33950600  | -0.90241800 | -5.45583400 | H |
| O | -1 | 0.27876300  | 1.89799300  | 6.35098900  | L | C | 0  | -5.40795500  | -0.67141100 | -4.49785600 | H |
| N | -1 | 1.49629500  | 0.16181000  | 5.52128200  | L | N | 0  | -4.18893400  | -1.19166600 | -4.53788700 | H |
| C | -1 | 0.47579300  | -0.88615800 | 5.67791200  | L | N | 0  | -5.76443300  | 0.12113900  | -3.47147600 | H |
| C | -1 | 0.61529800  | -1.96019300 | 4.56573400  | L | C | -1 | -7.35017700  | -5.64238200 | -4.32221800 | L |
| C | -1 | -0.38967900 | -3.07759800 | 4.75721000  | L | O | -1 | -7.51655700  | -5.30599200 | -3.12108000 | L |
| C | -1 | 0.39908200  | -1.32401600 | 3.19238600  | L | N | -1 | -4.35243100  | -9.72739400 | 1.69185700  | L |
| C | -1 | 0.56769400  | -1.59047200 | 7.04178100  | L | C | -1 | -3.72693600  | -8.44770000 | 2.02992800  | L |
| O | -1 | -0.48153300 | -1.86643800 | 7.67938200  | L | C | -1 | -4.59953300  | -7.29578000 | 1.48867100  | L |
| N | -1 | 9.45520800  | -1.31928500 | -3.80856100 | L | C | -1 | -3.79486000  | -6.04061400 | 1.22337800  | L |
| C | -1 | 8.35620100  | -0.54945100 | -4.35649200 | L | C | -1 | -2.98692600  | -5.91948900 | 0.08089900  | L |
| C | 0  | 7.38963800  | -0.06168800 | -3.27381700 | H | C | -1 | -2.21078200  | -4.80616800 | -0.12751200 | L |
| C | 0  | 6.24364800  | 0.81125500  | -3.78361500 | H | C | -1 | -2.22614500  | -3.78930800 | 0.79364200  | L |
| C | 0  | 4.98750600  | 0.27073300  | -4.08654200 | H | O | -1 | -1.45885700  | -2.68370600 | 0.60047500  | L |
| C | 0  | 3.90115000  | 1.07044700  | -4.44734800 | H | C | -1 | -3.00805800  | -3.88534200 | 1.93241200  | L |
| C | 0  | 4.04157900  | 2.46309900  | -4.49892900 | H | C | -1 | -3.79895700  | -5.00370200 | 2.12045600  | L |
| O | 0  | 3.02038100  | 3.31018400  | -4.80854400 | H | C | -1 | -3.47966300  | -8.30788000 | 3.53605600  | L |
| C | 0  | 5.29769100  | 3.02409100  | -4.22214900 | H | O | -1 | -4.31121500  | -8.77610100 | 4.35633600  | L |
| C | 0  | 6.36970800  | 2.20914800  | -3.86638100 | H | N | -1 | -3.28101700  | -5.46145300 | 5.53788300  | L |
| C | -1 | 8.83943400  | 0.65428700  | -5.17746400 | L | C | -1 | -3.93426000  | -4.38626200 | 6.26807600  | L |
| O | -1 | 9.76119900  | 1.38812600  | -4.73541500 | L | C | -1 | -4.32785100  | -3.23090800 | 5.32368700  | L |
| N | -1 | 7.68147600  | 10.47266900 | 0.93322900  | L | C | -1 | -4.12512800  | -1.88048300 | 5.96736100  | L |
| C | -1 | 6.38733900  | 10.27358600 | 1.60129400  | L | O | 0  | -4.74082300  | -0.73321300 | 5.17421800  | H |
| C | -1 | 6.06572500  | 8.78976800  | 1.76119700  | L | N | 0  | -4.14743100  | -0.56422300 | 3.84329500  | H |
| C | -1 | 5.56481100  | 8.19019800  | 0.49154800  | L | C | 0  | -3.12996400  | 0.26448800  | 3.49369700  | H |
| C | -1 | 5.74857900  | 8.68507100  | -0.78942000 | L | N | 0  | -2.50589400  | 1.03420400  | 4.38115100  | H |
| N | -1 | 5.13075200  | 7.89002300  | -1.70070000 | L | N | 0  | -2.80806500  | 0.31733500  | 2.19927300  | H |
| C | -1 | 4.54247500  | 6.82932400  | -1.04635600 | L | C | -1 | -5.12110300  | -4.78719700 | 7.15237100  | L |
| C | -1 | 4.80528500  | 6.98031800  | 0.33645900  | L | O | -1 | -5.24405900  | -4.29251300 | 8.30287500  | L |
| C | -1 | 4.28218100  | 6.03228400  | 1.23498400  | L | C | 0  | 0.50333600   | -0.62089300 | -2.82230900 | H |
| C | -1 | 3.54830000  | 4.97894800  | 0.71906400  | L | O | 0  | 0.69462700   | -0.29557400 | -4.16308400 | H |
| C | -1 | 3.32768800  | 4.83306800  | -0.65371400 | L | C | 0  | 1.55637300   | 0.06116500  | -1.89358200 | H |
| C | -1 | 3.80622700  | 5.75508700  | -1.55746700 | L | O | 0  | 2.70848100   | -0.75145400 | -1.80500000 | H |
| C | -1 | 6.31633500  | 11.01608000 | 2.93267900  | L | O | 0  | -0.88065000  | -0.25928200 | -2.55901700 | H |
| N | 0  | -0.18509600 | 6.54861200  | 2.64405300  | H | C | 0  | -1.28878600  | 0.18761200  | -1.29255200 | H |
| C | 0  | -0.52381100 | 5.20798900  | 2.17079700  | H | C | 0  | -0.31157000  | 1.15117500  | -0.61533300 | H |
| C | 0  | -1.07606200 | 4.37908400  | 3.37999300  | H | O | 0  | -0.80796500  | 1.46908600  | 0.69400300  | H |
| O | 0  | -0.95640700 | 2.98409900  | 3.15540700  | H | C | 0  | 1.06112100   | 0.05098600  | -0.50786100 | H |
| C | 0  | -2.53743200 | 4.65731300  | 3.71760100  | H | O | 0  | 1.99706000   | 1.45220300  | -0.00862700 | H |
| C | 0  | -1.46326300 | 5.09518400  | 0.95493900  | H | C | 0  | -2.62518000  | 0.85502100  | -1.52627800 | H |
| O | 0  | -1.64579100 | 4.00944200  | 0.39511600  | H | O | 0  | -3.60728300  | -0.14821600 | -1.94015500 | H |
| N | 0  | -2.08591700 | 6.24401100  | 0.57183200  | H | H | -1 | 2.64122200   | -5.86631700 | 0.30191200  | L |
| C | -1 | -3.10114700 | 6.29909700  | -0.54498700 | L | H | -1 | 3.17214600   | -5.00860500 | 1.75637600  | L |
| C | -1 | -4.22676400 | 7.26699500  | -0.17601000 | L | H | 0  | 0.22058000   | -4.95038400 | 0.87993700  | H |
| C | -1 | -4.98698800 | 6.84098900  | 1.08675300  | L | H | 0  | 1.05717900   | -3.87350700 | 2.04239400  | H |
| C | -1 | -4.55027700 | 7.22214100  | 2.34760400  | L | H | -1 | 1.64726700   | -6.43752200 | 3.19484600  | L |
| C | -1 | -5.23162400 | 6.83674900  | 3.49926500  | L | H | -1 | 3.46475000   | -7.85784700 | 1.37258900  | L |
| C | -1 | -6.36537100 | 6.05194600  | 3.38303600  | L | H | -1 | 3.85348000   | -7.11013600 | 2.78533200  | L |
| O | -1 | -7.05384800 | 5.66980200  | 4.52994200  | L | H | -1 | 1.66575000   | -5.03244100 | -2.96894000 | L |
| C | -1 | -6.82376600 | 5.67313900  | 2.14283300  | L | H | -1 | 2.55798500   | -4.10576300 | -4.18387000 | L |
| C | -1 | -6.12201000 | 6.06073000  | 0.99908500  | L | H | -1 | 1.15067300   | -4.78227800 | -6.72476200 | L |
| C | -1 | -2.34562800 | 6.73305600  | -1.79996000 | L | H | -1 | -0.41844900  | -4.06777100 | -2.78577400 | L |
| O | -1 | -2.40575300 | 7.90379400  | -2.21538200 | L | H | -1 | -0.96971900  | -4.01417500 | -7.70918000 | L |
| N | -1 | -1.64735900 | 5.77241400  | -2.40518700 | L | H | -1 | -2.52239400  | -3.28347700 | -3.74489800 | L |
| C | -1 | -0.58946700 | 6.04911500  | -3.41101000 | L | H | -1 | -3.02641700  | -3.21359700 | -7.24155500 | L |
| C | 0  | 0.33936100  | 4.82971100  | -3.49573600 | H | H | -1 | 3.00055500   | -5.99778500 | -5.58314200 | L |
| C | 0  | -0.35587300 | 3.45109100  | -3.71553000 | H | H | -1 | 1.90675800   | -8.09259600 | -5.17482600 | L |
| O | 0  | -1.56804700 | 3.31820400  | -3.35646900 | H | H | -1 | 0.90954500   | -7.40375000 | -4.07801600 | L |
| O | 0  | 0.39918700  | 2.54339700  | -4.16447700 | H | H | -1 | 5.59205500   | -4.65698600 | -0.27931000 | L |
| C | -1 | -1.08704300 | 6.47505300  | -4.78107200 | L | H | -1 | 7.30739200   | -4.22051200 | -0.30838300 | L |
| O | -1 | -0.25297900 | 6.60394600  | -5.71449700 | L | H | -1 | 8.38519700   | -4.99308900 | -2.80444500 | L |
| N | -1 | -9.14245200 | 5.48036100  | -5.35983900 | L | H | -1 | 4.41908500   | -3.50646600 | -1.98835500 | L |
| C | -1 | -8.94190200 | 5.12875600  | -3.94272900 | L | H | -1 | 8.19906000   | -4.24096700 | -5.13669900 | L |

|   |    |              |             |             |   |   |    |              |             |             |   |
|---|----|--------------|-------------|-------------|---|---|----|--------------|-------------|-------------|---|
| H | -1 | 4.23158700   | -2.74857400 | -4.34122900 | L | H | -1 | -8.64517000  | -3.09883900 | -6.30886700 | L |
| H | -1 | 7.00735000   | -3.17052300 | -6.53618000 | L | H | -1 | -8.09234800  | -3.01826200 | -4.63163900 | L |
| H | -1 | 7.96236600   | -6.47933000 | -1.13770800 | L | H | -1 | -6.31787500  | -3.96280300 | -6.97502300 | L |
| H | -1 | 6.06977700   | -6.78909400 | -2.53838800 | L | H | -1 | -5.77913600  | -3.67034000 | -5.32365300 | L |
| H | -1 | 5.07365100   | -7.02361000 | -1.26332900 | L | H | 0  | -6.94594800  | -1.58308200 | -7.31428300 | H |
| H | -1 | 3.39076900   | -2.90179900 | 3.18582600  | L | H | 0  | -5.23170800  | -1.80504300 | -6.98519500 | H |
| H | -1 | 3.27676900   | -1.00227100 | 1.51533700  | L | H | 0  | -7.28437900  | -0.69826500 | -5.15639600 | H |
| H | -1 | 4.92227600   | -0.49289800 | 1.98077300  | L | H | 0  | -3.88399100  | -1.90767300 | -5.21021000 | H |
| H | -1 | 3.60234200   | -0.39737100 | 3.14513600  | L | H | 0  | -3.50819700  | -0.88478200 | -3.82997100 | H |
| H | -1 | 4.10535800   | -3.24618400 | 1.08761100  | L | H | 0  | -6.47410800  | 0.82711100  | -3.61528400 | H |
| H | -1 | 6.32764200   | -1.91324800 | 3.48248500  | L | H | 0  | -5.06679000  | 0.25111100  | -2.71771200 | H |
| H | -1 | 5.04779200   | -4.42702700 | 3.96451100  | L | H | -1 | -8.05315700  | -5.58070100 | -6.38074200 | L |
| H | -1 | 6.61687500   | -3.99875000 | 4.02309000  | L | H | -1 | -10.23321200 | -4.87752500 | -5.79451400 | L |
| H | 0  | 1.38956200   | 3.81290100  | 4.65438100  | H | H | -1 | -9.86710600  | -4.79916800 | -4.20568800 | L |
| H | 0  | 3.14401400   | 4.12148100  | 4.64295700  | H | H | -1 | -5.08499700  | -7.59016800 | 0.53395900  | L |
| H | -1 | 2.58935600   | 2.99044700  | 6.68976900  | L | H | -1 | -5.42685200  | -7.06760000 | 2.19000700  | L |
| H | -1 | 4.17409700   | 1.57125900  | 4.75784900  | L | H | -1 | -2.96951200  | -6.74304200 | -0.64237400 | L |
| H | -1 | 4.47064300   | 1.91310500  | 6.33972500  | L | H | -1 | -4.33330600  | -4.66451400 | 3.04350600  | L |
| H | -1 | 1.64617800   | -2.39877400 | 4.60555800  | L | H | -1 | -1.59865500  | -4.73833700 | -1.04012600 | L |
| H | -1 | -0.30973300  | -3.81932400 | 3.94831300  | L | H | -1 | -3.05727100  | -3.07021700 | 2.67505900  | L |
| H | -1 | -1.42562200  | -2.70172500 | 4.74922400  | L | H | -1 | -1.00660600  | -2.75986900 | -0.24116200 | L |
| H | -1 | -0.24366200  | -3.61835800 | 5.70436900  | L | H | -1 | -2.73182900  | -8.43246900 | 1.51715200  | L |
| H | -1 | 0.52658200   | -2.09733200 | 2.40933800  | L | H | -1 | -4.54083600  | -9.75803900 | 0.71058500  | L |
| H | -1 | -0.61219700  | -0.91359200 | 3.08357300  | L | H | -1 | -5.20769800  | -9.84736200 | 2.19407100  | L |
| H | -1 | 1.11513100   | -0.52074300 | 2.96177800  | L | H | -1 | -5.38629500  | -3.35150800 | 5.00744900  | L |
| H | -1 | -0.53972100  | -0.41614700 | 5.58302400  | L | H | -1 | -3.74587100  | -3.27292400 | 4.36168100  | L |
| H | -1 | 2.25834700   | -0.07133600 | 4.91367500  | L | H | -1 | -4.55801100  | -1.87850700 | 6.99020700  | L |
| H | 0  | 6.98121400   | -0.94882700 | -2.75973500 | H | H | -1 | -3.03850200  | -1.68895000 | 6.11752300  | L |
| H | 0  | 7.95774000   | 0.48654100  | -2.50149400 | H | H | 0  | -5.82540800  | -0.89177600 | 5.02993500  | H |
| H | 0  | 4.82917700   | -0.80698900 | -4.01176100 | H | H | 0  | -4.63815700  | 0.22390300  | 5.71330800  | H |
| H | 0  | 7.32665800   | 2.67185900  | -3.62219200 | H | H | 0  | -4.31988700  | -1.31362000 | 3.18391100  | H |
| H | 0  | 2.93861100   | 0.60734700  | -4.64370000 | H | H | 0  | -3.46717000  | -0.02176400 | 1.51386600  | H |
| H | 0  | 5.39987000   | 4.10699700  | -4.25204200 | H | H | 0  | -1.95817200  | 0.77393200  | 1.81057300  | H |
| H | 0  | 2.13499800   | 2.89518600  | -4.65275300 | H | H | 0  | -2.47008200  | 0.77131400  | 5.35752000  | H |
| H | -1 | 7.81090100   | -1.23608700 | -5.05558100 | L | H | -1 | -1.84864700  | 1.76901400  | 4.03827300  | H |
| H | -1 | 10.18569700  | -1.38672800 | -4.48648200 | L | H | -1 | -3.13914100  | -3.90454200 | 6.91740800  | L |
| H | -1 | 9.81059400   | -0.93281200 | -2.95804800 | L | H | -1 | -3.60042300  | -5.42946400 | 4.58834200  | L |
| H | -1 | 6.95061200   | 8.21875900  | 2.11158700  | L | H | -1 | -2.17892600  | -4.78239200 | 5.72756800  | L |
| H | -1 | 5.29327400   | 8.65639600  | 2.54634000  | L | H | 0  | 0.59786200   | -1.70338200 | -2.71068100 | H |
| H | -1 | 6.29517200   | 9.58812300  | -1.07652000 | L | H | 0  | 0.49086400   | 0.66984100  | -4.23791600 | H |
| H | -1 | 5.30119500   | 7.91214400  | -2.67376800 | L | H | 0  | 1.86924100   | 0.97891700  | -2.40285300 | H |
| H | -1 | 4.45335200   | 6.13770400  | 2.31036700  | L | H | 0  | 2.52961500   | -1.55953800 | -1.25385600 | H |
| H | -1 | 3.12289200   | 4.23196800  | 1.40383700  | L | H | 0  | -1.41885500  | -0.67182900 | -0.59865400 | H |
| H | -1 | 3.63634700   | 5.61536600  | -2.63533900 | L | H | 0  | -0.24295600  | 2.06946600  | -1.20575000 | H |
| H | -1 | 2.74281900   | 3.97248300  | -1.00930500 | L | H | 0  | -0.98682500  | 2.43594000  | 0.73993100  | H |
| H | -1 | 5.61787400   | 10.74221600 | 0.93403800  | L | H | 0  | 0.99201400   | -0.36812700 | 0.16015600  | H |
| H | -1 | 8.40998900   | 10.00712000 | 1.43392000  | L | H | 0  | 1.79475200   | 1.71500100  | 0.93428700  | H |
| H | -1 | 7.88565200   | 11.44904000 | 0.88503900  | L | H | 0  | -2.53040300  | 1.57364900  | -2.34518200 | H |
| H | 0  | -0.44603800  | 4.69083700  | 4.22466800  | H | H | 0  | -2.98960900  | 1.32213500  | -0.62351500 | H |
| H | 0  | -2.79881800  | 4.18533400  | 4.67152900  | H | H | 0  | -3.47748600  | -0.92964500 | -1.37603600 | H |
| H | 0  | -3.19175200  | 4.23841200  | 2.93795300  | H | O | -1 | 7.36313500   | 11.20250000 | 3.60575400  | L |
| H | 0  | -2.75236500  | 5.73114400  | 3.80967000  | H | H | -1 | 8.36653500   | 0.88447900  | -6.14037800 | L |
| H | 0  | 0.01472300   | 2.75748400  | 2.96473300  | H | H | -1 | 7.71949800   | -6.92780800 | 1.27346100  | L |
| H | 0  | 0.41094700   | 4.71582300  | 1.88006300  | H | H | -1 | 1.06743000   | -8.17533800 | 0.61506600  | L |
| H | 0  | 0.30992100   | 7.09529000  | 1.94532100  | H | H | -1 | -2.57732700  | -7.78319700 | 3.87562700  | L |
| H | 0  | -0.98730600  | 7.07424300  | 2.98298400  | H | H | -1 | -10.40783200 | -2.16162800 | 3.82588600  | L |
| H | -1 | -4.93504200  | 7.32589500  | -1.02716800 | L | H | -1 | -10.33443800 | 6.82681400  | -3.31091600 | L |
| H | -1 | -3.84076700  | 8.29801000  | -0.03851100 | L | H | -1 | 5.34622000   | 11.36796200 | 3.30611700  | L |
| H | -1 | -3.63333100  | 7.82280100  | 2.43953300  | L | H | -1 | -2.15304800  | 6.67570200  | -4.90547000 | L |
| H | -1 | -6.48380200  | 5.73330500  | 0.01460900  | L | H | -1 | 5.52597600   | -0.68813400 | 5.38378100  | L |
| H | -1 | -4.86322500  | 7.14430800  | 4.48487700  | L | H | -1 | 4.27649100   | -7.44927700 | -3.97545100 | L |
| H | -1 | -7.72029500  | 5.04971500  | 2.02701600  | L | H | -1 | -6.57575500  | -6.36745900 | -4.60064600 | L |
| H | -1 | -7.79586400  | 5.14992500  | 4.24792600  | L | H | -1 | 1.55644500   | -1.85072800 | 7.44457400  | L |
| H | -1 | -3.53577700  | 5.26033800  | -0.64265400 | L | H | -1 | -5.85104200  | -5.51503700 | 6.77525100  | L |
| H | 0  | -1.84992400  | 7.11029500  | 1.04780300  | H | H | -1 | -9.05069100  | -3.70606800 | -0.56344800 | L |
| H | 0  | 1.10739200   | 4.97420000  | -4.27941400 | H | N | -1 | 9.86505100   | 2.33540800  | 2.42731900  | L |
| H | 0  | 0.92400000   | 4.72419000  | -2.55490200 | H | C | -1 | 8.50992700   | 1.79644600  | 2.16361600  | L |
| H | -1 | -0.00580000  | 6.92357000  | -3.02009700 | L | C | 0  | 8.17480900   | 1.92530500  | 0.66723600  | H |
| H | -1 | -2.12094800  | 4.88983700  | -2.52961500 | L | C | 0  | 6.81883800   | 1.39620700  | 0.30427900  | H |
| H | -1 | -7.45638700  | 5.40601900  | -2.39898300 | L | N | 0  | 6.66381700   | 0.10271000  | -0.16251400 | H |
| H | -1 | -7.26256500  | 6.50872100  | -3.76023500 | L | C | 0  | 5.38148500   | -0.09378600 | -0.46032500 | H |
| H | -1 | -6.76577500  | 3.46684500  | -3.84550500 | L | N | 0  | 4.70409800   | 1.02830900  | -0.19390000 | H |
| H | -1 | -6.55260500  | 4.56021900  | -5.22118100 | L | C | 0  | 5.57560300   | 1.97016400  | 0.29588300  | H |
| H | -1 | -4.46127700  | 3.05177600  | -4.38931300 | L | C | -1 | 8.46116200   | 0.31013000  | 2.61513400  | L |
| H | -1 | -3.18787500  | 3.93896300  | -3.69748500 | L | O | -1 | 7.45838600   | -0.12191500 | 3.18227600  | L |
| H | -1 | -9.09772000  | 4.02139200  | -3.87515400 | L | N | -1 | 9.49250600   | -0.45317000 | 2.26437200  | L |
| H | -1 | -10.09251900 | 5.31379800  | -5.61728600 | L | C | -1 | 9.51504300   | -1.88357000 | 2.48899500  | L |
| H | -1 | -8.91980300  | 6.44156000  | -5.51777700 | L | C | 0  | 8.77372200   | -2.67407100 | 1.39181700  | H |
| H | -1 | -8.18892700  | 0.06626100  | 3.26956800  | L | C | 0  | 9.28984100   | -2.32772400 | -0.05277000 | H |
| H | -1 | -9.22509100  | 1.50250700  | 3.33552600  | L | O | 0  | 10.11709700  | -3.09202700 | -0.55437700 | H |
| H | -1 | -9.95822500  | 0.69946300  | -0.08673600 | L | O | 0  | 8.81130200   | -1.25180300 | -0.57258300 | H |
| H | -1 | -8.15107600  | 1.42411500  | -1.72683800 | L | C | -1 | 10.92719100  | -2.42845500 | 2.61693500  | L |
| H | -1 | -6.15421400  | 1.80369700  | 3.18151900  | L | O | -1 | 11.91279400  | -1.68648700 | 2.36866100  | L |
| H | -1 | -4.09137100  | 2.93187600  | 2.28312200  | L | H | 0  | 8.92167700   | 1.37915100  | 0.05736200  | H |
| H | -1 | -5.73605700  | 2.88153500  | -1.70927600 | L | H | 0  | 8.22330900   | 2.99133400  | 0.36873400  | H |
| H | -1 | -3.87377100  | 3.41257200  | -0.13304000 | L | H | 0  | 5.22626900   | 2.94257700  | 0.61779000  | H |
| H | -1 | -9.99710100  | -1.01310600 | 1.70332800  | L | H | 0  | 3.66976700   | 1.12189700  | -0.23104600 | H |
| H | -1 | -12.18315500 | -0.16470300 | 2.17685000  | L | H | 0  | 4.93501700   | -0.99752900 | -0.84159400 | H |
| H | -1 | -11.56158800 | 1.18117700  | 2.85777500  | L | H | -1 | 7.74504900   | 2.35230300  | 2.76424400  | L |
| H | -1 | -6.35811400  | -3.97320200 | -1.52838900 | L | H | -1 | 10.31718300  | 2.63103100  | 1.58686800  | L |
| H | -1 | -5.09912200  | -4.09071600 | -0.27204200 | L | H | -1 | 9.80363900   | 3.10538100  | 3.05727200  | L |
| H | -1 | -6.73292800  | -4.36109500 | 1.51619100  | L | H | 0  | 8.92082300   | -3.75869200 | 1.55604800  | H |
| H | -1 | -6.60954400  | -6.07035500 | -0.60891900 | L | H | 0  | 7.68409800   | -2.46898500 | 1.46443600  | H |
| H | -1 | -8.18658300  | -5.99928600 | -0.22391200 | L | H | -1 | 8.98305500   | -2.10921200 | 3.45050400  | L |



H -1 10.16077400 -0.10359200 1.60731000 L  
H -1 11.05839100 -3.47899000 2.90283800 L  
H 0 7.50959500 -0.58877100 -0.28396900 H  
H 0 -6.11523100 -2.61743000 -0.36786000 L

Glc\_E777Q

ONIOM: extrapolated energy = -3333.331872 au

N -1 3.12649000 -7.60418800 2.25346200 L  
C -1 1.95789300 -6.75946400 2.14556700 L  
C -1 2.31006700 -5.52152400 1.27744600 L H 4  
C 0 1.22878000 -4.47694900 1.11064600 H  
C 0 1.57445400 -3.48147100 -0.04490800 H  
O 0 2.73668300 -2.97355200 -0.04859000 H  
O 0 0.64604900 -3.22129400 -0.86306000 H  
C -1 0.82649800 -7.53271000 1.45616200 L  
O -1 -0.35383500 -7.43256700 1.88084400 L  
N -1 1.48119300 -7.22657700 -4.91271800 L  
C -1 2.49330100 -6.22409600 -4.64719100 L  
C -1 1.86613100 -4.93169000 -4.08534600 L  
C -1 0.55652700 -4.47971500 -4.71095000 L  
C -1 0.38468200 -4.43378200 -6.08567600 L  
C -1 -0.80791500 -3.98355100 -6.64367300 L  
C -1 -1.82538700 -3.53924200 -5.81713000 L  
O -1 -3.01733400 -3.08851700 -6.32412700 L  
C -1 -1.66989700 -3.56892500 -4.44405600 L  
C -1 -0.48307700 -4.02758000 -3.90437800 L  
C -1 3.44905800 -6.84654800 -3.64164400 L  
O -1 3.26033200 -6.68126600 -2.40850400 L  
N -1 6.01909100 -7.15987400 -1.60744500 L  
C -1 6.93163900 -6.37789200 -0.78087200 L  
C -1 6.57154400 -4.89698400 -0.84101500 L  
C -1 6.44893200 -4.38255500 -2.25171300 L  
C -1 7.49012600 -4.59923200 -3.16082600 L  
C -1 7.39495100 -4.17134700 -4.46451300 L  
C -1 6.25034800 -3.53168300 -4.87170400 L  
O -1 6.20561900 -3.10635400 -6.17276900 L  
C -1 5.19786800 -3.30296600 -4.01292000 L  
C -1 5.29831800 -3.73065800 -2.69341700 L  
C -1 6.81052000 -6.82240100 0.67237000 L  
O -1 5.67455200 -6.95291000 1.19783600 L  
N -1 5.72943300 -3.81007700 4.30828000 L  
C -1 5.44626300 -2.45895500 3.87657300 L  
C -1 4.39051300 -2.45694800 2.79670000 L  
O -1 4.86914100 -3.25107700 1.70229900 L  
C -1 4.09154600 -1.04142500 2.31787600 L  
C -1 4.98603600 -1.60296000 5.06937200 L  
O -1 3.92448100 -1.89316800 5.67965900 L  
N -1 3.89987500 1.50861600 5.69498600 L  
C -1 2.67441200 2.34437100 5.75559600 L H 43  
C 0 2.51464600 3.32048300 4.58817800 H  
C 0 2.74058100 2.62544000 3.22050100 H  
O 0 3.87996500 2.18360000 2.99791700 H  
O 0 1.72708600 2.56056700 2.42959800 H  
C -1 1.43206600 1.42800300 5.88088800 L  
O -1 0.38218800 1.90881500 6.33679900 L  
N -1 1.57876100 0.15820400 5.50691700 L  
C -1 0.54434100 -0.87660500 5.65967700 L  
C -1 0.67223000 -1.95061300 4.54607800 L  
C -1 -0.34764900 -3.05511100 4.73360600 L  
C -1 0.46730200 -1.30950400 3.17329400 L  
C -1 0.62409500 -1.58420800 7.02260800 L  
O -1 -0.43002000 -1.84746700 7.65751500 L  
N -1 9.53784900 -1.41188900 -3.80821400 L  
C -1 8.45016500 -0.62692400 -4.35725900 L H 58  
C 0 7.48212400 -0.13664700 -3.27738000 H  
C 0 6.34224900 0.74376800 -3.78906800 H  
C 0 5.06761600 0.22256500 -4.04712700 H  
C 0 3.99309400 1.03857600 -4.40867700 H  
C 0 4.16537700 2.42490800 -4.50872600 H  
O 0 3.15540300 3.28173700 -4.82594400 H  
C 0 5.43930400 2.96430900 -4.27698000 H  
C 0 6.49841800 2.13511300 -3.91825500 H  
C -1 8.95083200 0.57170500 -5.17526100 L  
O -1 9.88113300 1.29275600 -4.73006200 L  
N -1 7.90782600 10.39470800 0.94869000 L  
C -1 6.60976000 10.21147400 1.61365900 L  
C -1 6.26847200 8.73172800 1.77049000 L  
C -1 5.76252900 8.14074900 0.49880900 L  
C -1 5.95550700 8.63520200 -0.78096500 L  
N -1 5.32933600 7.84972100 -1.69484200 L  
C -1 4.72585800 6.79575600 -1.04346400 L  
C -1 4.98762300 6.94112800 0.34015100 L  
C -1 4.45025400 5.99858300 1.23603000 L  
C -1 3.70381300 4.95572800 0.71684800 L  
C -1 3.48428500 4.81490200 -0.65663400 L  
C -1 3.97676800 5.73202500 -1.55787600 L  
C -1 6.54556600 10.95273100 2.94607900 L  
N 0 -0.02879400 6.62157900 2.64642300 H  
C 0 -0.36422400 5.27808200 2.17815300 H  
C 0 -0.91129300 4.45344200 3.39741200 H  
O 0 -0.76543500 3.05670200 3.21166700 H  
C 0 -2.38060400 4.70840500 3.71868800 H  
C 0 -1.29778800 5.16906400 0.95623000 H

O 0 -1.47877700 4.08729300 0.38703600 H  
N 0 -1.91277000 6.31641800 0.56231900 H  
C -1 -2.92509600 6.36451200 -0.55932700 L H 88  
C -1 -4.03878700 7.34643700 -0.19121400 L  
C -1 -4.80723500 6.92839300 1.06923400 L  
C -1 -4.36831900 7.30182500 2.33162800 L  
C -1 -5.05712500 6.92354000 3.48120600 L  
C -1 -6.20075900 6.15378000 3.36128800 L  
O -1 -6.89664200 5.77884300 4.50610100 L  
C -1 -6.66137100 5.78294300 2.11949900 L  
C -1 -5.95214600 6.16314800 0.97788100 L  
C -1 -2.16126600 6.79056000 -1.81197900 L  
O -1 -2.20521700 7.96263600 -2.22565100 L  
N -1 -1.47428300 5.82183700 -2.41725600 L  
C -1 -0.41068100 6.08630800 -3.42040200 L H 102  
C 0 0.52035200 4.87274000 -3.49797700 H  
C 0 -0.17559500 3.50205500 -3.68125200 H  
O 0 -1.40858200 3.38327000 -3.42041700 H  
O 0 0.60027900 2.55610300 -4.01169800 H  
C -1 -0.89970900 6.52086300 -4.79079800 L  
O -1 -0.06201600 6.64033300 -5.72222700 L  
N -1 -8.96613500 5.63226900 -5.38842500 L  
C -1 -8.77325500 5.27584200 -3.97145400 L  
C -1 -7.35171700 5.58670200 -3.53246000 L  
C -1 -6.33131800 4.62743700 -4.13811400 L  
C -1 -4.91801100 4.91811900 -3.71912300 L  
O -1 -4.59153500 6.03067600 -3.28488800 L  
N -1 -4.04886300 3.91205000 -3.84738600 L  
C -1 -9.79591600 5.98268000 -3.07653800 L  
O -1 -10.22665300 5.41195400 -2.04101500 L  
N -1 -11.29963100 0.61800800 2.15713000 L  
C -1 -10.10923800 -0.14537600 2.50130800 L  
C -1 -8.88247900 0.75352900 2.67961600 L  
C -1 -8.27077100 1.22152700 1.38232700 L  
C -1 -8.84955600 1.19362500 0.13563100 L  
N -1 -7.98770100 1.74562100 -0.79044600 L  
C -1 -6.84414500 2.15505700 -0.15484000 L  
C -1 -6.98182500 1.83262200 1.21321700 L  
C -1 -5.93988800 2.13512200 2.08778800 L  
C -1 -4.79042200 2.71564200 1.59191400 L  
C -1 -4.66306700 3.00936500 0.20473900 L  
C -1 -5.68913900 2.74345600 -0.66808800 L  
C -1 -10.43485000 -0.91203700 3.76784500 L  
O -1 -10.80602700 -0.29428200 4.79943500 L  
N -1 -7.24427800 -5.68700100 0.06031400 L  
C -1 -7.08355300 -4.27726000 0.42448700 L  
C -1 -6.07515700 -3.59955400 -0.51455700 L H 134  
C 0 -6.08896000 -2.07725100 -0.41887400 H  
C 0 -5.17178600 -1.62150000 0.71361500 H  
O -1 -5.48302300 -1.74049200 1.90193800 H  
C -1 -8.43144000 -3.53373000 0.33081100 L  
O -1 -8.86879900 -2.89640200 1.32383800 L  
N -1 -9.61061100 -5.08279300 -5.12046300 L  
C -1 -8.20244800 -4.89347300 -5.46707700 L  
C -1 -7.87292300 -3.41866900 -5.63047300 L  
C -1 -6.44675900 -3.20694800 -6.12302100 L H 143  
C 0 -6.18315800 -1.77341200 -6.57031800 H  
N 0 -6.16025500 -0.81155900 -5.46424500 H  
C 0 -5.07221300 -0.32283200 -4.83751400 H  
N 0 -3.83366000 -0.66276000 -5.19304700 H  
N 0 -5.21998600 0.59137400 -3.86837700 H  
C -1 -7.32134800 -5.51453500 -4.36482300 L  
O -1 -7.48592500 -5.17789800 -3.16350600 L  
N -1 -4.39016300 -9.64779400 1.64909600 L  
C -1 -3.74876200 -8.37690500 1.99056100 L  
C -1 -4.60508500 -7.21284500 1.44928500 L  
C -1 -3.78353600 -5.96786800 1.18773200 L  
C -1 -2.97162000 -5.85549300 0.04718300 L  
C -1 -2.18057100 -4.75206700 -0.15777700 L  
C -1 -2.18466300 -3.73654600 0.76497400 L  
O -1 -1.40260100 -2.64074700 0.57522700 L  
C -1 -2.97022300 -3.82416700 1.90191000 L  
C -1 -3.77604800 -4.93240800 2.08646400 L  
C -1 -3.50294600 -8.24269800 3.49743800 L  
O -1 -4.34230800 -8.70132400 4.31518100 L  
N -1 -3.27151900 -5.40226700 5.50425300 L  
C -1 -3.91225800 -4.31979800 6.23476900 L  
C -1 -4.28871700 -3.15792100 5.29140600 L  
C -1 -4.06974600 -1.81125100 5.93766000 L H 166  
C 0 -4.65582500 -0.61501500 5.20147700 H  
N 0 -4.01586700 -0.35192800 3.91303500 H  
C 0 -2.97323800 0.45316100 3.66730900 H  
N 0 -2.23664000 1.02685000 4.62513800 H  
N 0 -2.67712800 0.70688100 2.37812500 H  
C -1 -5.10614200 -4.70660700 7.11587400 L  
O -1 -5.22512500 -4.21217700 8.26690500 L  
C 0 0.41927900 -0.67703300 -2.63857900 H  
O 0 0.09764900 -0.09772800 -3.86742900 H  
C 0 1.59834600 -0.00060700 -1.85594800 H  
O 0 2.73393700 -0.83497400 -1.82698100 H  
O 0 -0.78724200 -0.81382600 -1.83005900 H  
C 0 -1.21937900 0.24132800 -0.97968100 H  
C 0 -1.4235200 1.20374100 -0.50632100 H  
O 0 -0.52983500 1.65035900 0.79202900 H

|   |    |             |             |             |   |    |              |              |             |            |   |
|---|----|-------------|-------------|-------------|---|----|--------------|--------------|-------------|------------|---|
| C | 0  | 1.20538900  | 0.50191600  | -0.45179100 | H | -1 | -1.95907400  | 4.94571900   | -2.54411300 | L          |   |
| O | 0  | 2.18134300  | 1.43964900  | -0.02498300 | H | -1 | -7.28759400  | 5.53126400   | -2.42408600 | L          |   |
| C | 0  | -2.38874400 | 0.93512800  | -1.67570300 | H | -1 | -7.07646000  | 6.63348900   | -3.78314700 | L          |   |
| O | 0  | -3.15404900 | -0.13064300 | -2.31981700 | H | -1 | -6.61920700  | 3.58552900   | -3.87223600 | L          |   |
| H | -1 | 2.65625100  | -5.87610600 | 0.28034200  | H | -1 | -6.38881700  | 4.67819600   | -5.24569500 | L          |   |
| H | -1 | 3.19516900  | -5.02769000 | 1.73731500  | L | -1 | -4.31914900  | 3.14127000   | -4.41174700 | L          |   |
| H | 0  | 0.24012800  | -4.92883200 | 0.89425400  | H | -1 | -3.03580000  | 4.01070700   | -3.71565500 | L          |   |
| H | 0  | 1.11666100  | -3.86023300 | 2.03751500  | H | -1 | -8.94365000  | 4.17050000   | -3.90599100 | L          |   |
| H | -1 | 1.64867200  | -6.43885800 | 3.17021900  | L | -1 | -9.91773400  | 5.47852200   | -5.64817500 | L          |   |
| H | -1 | 3.45141200  | -7.87989900 | 1.34958300  | L | -1 | -8.73062600  | 6.59072800   | -5.54434200 | L          |   |
| H | -1 | 3.84680400  | -7.13955400 | 2.76435400  | L | -1 | -8.10198800  | 0.19258400   | 3.23430300  | L          |   |
| H | -1 | 1.69881800  | -5.02441800 | -2.99125000 | L | -1 | -9.11946900  | 1.64212100   | 3.30034600  | L          |   |
| H | -1 | 2.60569200  | -4.10754400 | -4.20277500 | L | -1 | -9.85560900  | 0.85411000   | -0.12476500 | L          |   |
| H | -1 | 1.19517600  | -4.76163100 | -6.74776100 | L | -1 | -8.03561700  | 1.55770700   | -1.75982400 | L          |   |
| H | -1 | -0.37301900 | -4.03291800 | -2.81100100 | L | -1 | -6.04459800  | 1.90346000   | 3.15340400  | L          |   |
| H | -1 | -0.91288100 | -3.96437500 | -7.73548500 | L | -1 | -3.96528100  | 3.00604200   | 2.26124900  | L          |   |
| H | -1 | -2.46446700 | -3.21973500 | -3.77337200 | L | -1 | -5.60183700  | 2.98346400   | -1.73474700 | L          |   |
| H | -1 | -2.95996800 | -3.13777100 | -7.27098500 | L | -1 | -3.73619700  | 3.48767100   | -0.15367300 | L          |   |
| H | -1 | 3.02657100  | -6.00297000 | -5.60413100 | L | -1 | -9.92069400  | -0.86062700  | 1.66246100  | L          |   |
| H | -1 | 1.90466100  | -8.08397300 | -5.20152400 | L | -1 | -12.09651500 | 0.01547800   | 2.13265800  | L          |   |
| H | -1 | 0.91414800  | -7.38390500 | -4.10574900 | L | -1 | -11.45892000 | 1.35205700   | 2.81707300  | L          |   |
| H | -1 | 5.62385800  | -4.70446600 | -0.29261300 | L | -1 | -6.31364300  | -3.86285000  | -1.56619900 | L          |   |
| H | -1 | 7.34480100  | -4.29036400 | -0.31730800 | L | -1 | -5.05901300  | -3.99876200  | -0.30734700 | L          |   |
| H | -1 | 8.41783500  | -5.07300000 | -2.81229200 | L | 0  | -5.74472500  | -1.63612700  | -1.37145500 | H          |   |
| H | -1 | 4.46968300  | -3.53604100 | -2.00230300 | L | 0  | -7.10225200  | -1.68288900  | -0.21806500 | L          |   |
| H | -1 | 8.24657100  | -4.31483600 | -5.14372900 | L | -1 | -6.70007300  | -4.25062200  | 1.47694500  | L          |   |
| H | -1 | 4.29719100  | -2.77206100 | -4.35436900 | L | -1 | -6.59439800  | -5.95799100  | -0.65063800 | L          |   |
| H | -1 | 7.07195700  | -3.22672800 | -6.54404100 | L | -1 | -8.17120500  | -5.86960000  | -0.26889700 | L          |   |
| H | -1 | 7.97204800  | -6.55622500 | -1.14885300 | L | -1 | -8.57875200  | -2.95118200  | -6.35015700 | L          |   |
| H | -1 | 6.07861500  | -6.83905900 | -2.55408200 | L | -1 | -8.02855600  | -2.88047000  | -4.67162100 | L          |   |
| H | -1 | 5.07675800  | -7.06256900 | -1.28153800 | L | -1 | -6.26148700  | -3.84438500  | -7.01271000 | L          |   |
| H | -1 | 3.43816200  | -2.92617500 | 3.17061100  | L | -1 | -5.72255500  | -3.56158100  | -5.35972100 | L          |   |
| H | -1 | 3.35256300  | -1.02268900 | 1.50293400  | L | 0  | -6.95950300  | -1.43809200  | -7.28175000 | H          |   |
| H | -1 | 5.00356400  | -0.53556300 | 1.97271300  | L | 0  | -5.22515900  | -1.69268100  | -7.10973000 | H          |   |
| H | -1 | 3.68247200  | -0.42465900 | 3.13439600  | L | 0  | -7.03804600  | -0.66683700  | -4.98338600 | H          |   |
| H | -1 | 4.15279900  | -3.27652400 | 1.07330900  | L | 0  | -3.60809600  | -1.034852700 | -5.65717900 | H          |   |
| H | -1 | 6.38703100  | -1.97649600 | 3.47515100  | L | 0  | -3.05765000  | -0.21837000  | -4.70439700 | H          |   |
| H | -1 | 5.07346000  | -4.47411900 | 3.95039600  | L | 0  | -6.13738100  | 0.93722800   | -3.62153900 | H          |   |
| H | -1 | 6.64786500  | -4.06644400 | 4.01302500  | L | 0  | -4.46937600  | 0.56519800   | -3.15246700 | H          |   |
| H | 0  | 1.52475800  | 3.80920000  | 4.64063800  | H | -1 | -8.01900800  | -5.44044100  | -6.42474800 | L          |   |
| H | 0  | 3.27852100  | 4.11739800  | 4.67337400  | H | -1 | -10.19096900 | -4.70980600  | -5.84206500 | L          |   |
| H | -1 | 2.70609500  | 2.97049100  | 6.68228500  | L | -1 | -9.82731000  | -4.63873800  | -4.25233400 | L          |   |
| H | -1 | 4.27636500  | 1.53379400  | 4.75148800  | L | -1 | -5.09228100  | -7.49936800  | 0.49306300  | L          |   |
| H | -1 | 4.57392300  | 1.86924900  | 6.33454300  | L | -1 | -5.43087300  | -6.97499600  | 2.14921200  | L          |   |
| H | -1 | 1.69721300  | -2.40267000 | 4.58740700  | L | -1 | -2.96338500  | -6.67806100  | -0.67737200 | L          |   |
| H | -1 | -0.27563600 | -3.79654100 | 3.92369300  | L | -1 | -4.30792300  | -4.58773200  | 3.00891000  | L          |   |
| H | -1 | -1.37858100 | -2.66574200 | 4.72400300  | L | -1 | -1.56563800  | -4.69078800  | -1.06896600 | L          |   |
| H | -1 | -0.21074800 | -3.59922400 | 5.68020700  | L | -1 | -3.01040700  | -3.00964100  | 2.64575800  | L          |   |
| H | -1 | 0.58639800  | -2.08318200 | 2.38928000  | L | -1 | -0.94956500  | -2.72147900  | -0.26555800 | L          |   |
| H | -1 | -0.53829900 | -0.88574900 | 3.06297200  | L | -1 | -2.75243400  | -8.37384900  | 1.47994400  | L          |   |
| H | -1 | 1.19426600  | -0.51527900 | 2.94551000  | L | -1 | -4.57682800  | -9.67443000  | 0.66737400  | L          |   |
| H | -1 | -0.46474800 | -0.39323600 | 5.56336900  | L | -1 | -5.24800700  | -9.75738500  | 2.14928300  | L          |   |
| H | -1 | 2.33902100  | -0.08390700 | 4.90057200  | L | -1 | -5.34794200  | -3.26419700  | 4.97269400  | L          |   |
| H | 0  | 7.06726900  | -1.02252100 | -2.76661500 | H | -1 | -3.70523900  | -3.20600700  | 4.33057400  | L          |   |
| H | 0  | 8.04921000  | 0.40766800  | -2.50168300 | L | -1 | -4.50481900  | -1.80527200  | 6.95958200  | L          |   |
| H | 0  | 4.88707400  | -0.84834700 | -3.93764700 | H | -1 | -2.98107100  | -1.63416900  | 6.09047100  | L          |   |
| H | 0  | 7.47100000  | 2.58171900  | -3.70879200 | H | 0  | -5.72802100  | -0.77257200  | 4.98965200  | H          |   |
| H | 0  | 3.01333000  | 0.60103800  | -4.58187700 | H | 0  | -4.57494500  | 0.29574100   | 5.82353300  | H          |   |
| H | 0  | 5.56612000  | 4.04262700  | -4.34466400 | H | 0  | -4.41048900  | -0.87633000  | 3.12043600  | H          |   |
| H | 0  | 2.27328000  | 2.88839900  | -4.61027600 | H | 0  | -3.43750400  | 0.75588800   | 1.70904900  | H          |   |
| H | -1 | 7.89746700  | -1.30527800 | -5.05862100 | L | 0  | -1.80665100  | 1.17374700   | 2.08749800  | H          |   |
| H | -1 | 10.26885900 | -1.48779000 | -4.48467500 | L | 0  | -2.05035100  | 0.54748900   | 5.50268800  | H          |   |
| H | -1 | 9.89640200  | -1.03143000 | -2.95632000 | L | 0  | -1.56848100  | 1.75612400   | 4.32335300  | H          |   |
| H | -1 | 7.14507600  | 8.14867100  | 2.12185800  | L | -1 | -3.11233200  | -3.84951800  | 6.88657700  | L          |   |
| H | -1 | 5.49265100  | 8.60720800  | 2.55376100  | L | -1 | -3.58842500  | -5.36461600  | 4.55408200  | L          |   |
| H | -1 | 6.51445400  | 9.53149600  | -1.06544300 | L | -1 | -2.16107700  | -4.73794300  | 5.69738900  | L          |   |
| H | -1 | 5.50215700  | 7.87115100  | -2.66750700 | L | 0  | 0.68317700   | -1.71992000  | -2.80690200 | H          |   |
| H | -1 | 4.62045800  | 6.10006500  | 2.31194600  | L | 0  | 0.21991300   | 0.89062100   | -3.85809900 | L          |   |
| H | -1 | 3.26721800  | 4.21328200  | 1.39950800  | L | 0  | 1.89655300   | 0.88851100   | -2.42179200 | H          |   |
| H | -1 | 3.80741200  | 5.59623000  | -2.63633500 | L | 0  | 2.58474500   | -1.62675700  | -1.23602500 | H          |   |
| H | -1 | 2.88901400  | 3.96258200  | -1.01485500 | L | 0  | -1.56641900  | -0.26560400  | -0.07135300 | H          |   |
| H | -1 | 5.84791900  | 10.69115600 | 0.94550900  | L | 0  | -0.05560100  | 2.06583900   | -1.17630500 | H          |   |
| H | -1 | 8.62911800  | 9.91890400  | 1.45019300  | L | 0  | -0.71892700  | 2.61406600   | 0.75647000  | H          |   |
| H | -1 | 8.12482400  | 11.36840700 | 0.90250500  | L | 0  | 1.15029500   | -0.35367700  | 0.24079100  | H          |   |
| H | 0  | -0.29338100 | 4.79881800  | 4.23865200  | H | 0  | 1.99423900   | 1.75540200   | 0.90787900  | H          |   |
| H | 0  | -2.64050100 | 4.23585100  | 4.67236000  | H | 0  | -2.05547800  | 1.65226000   | -2.43282500 | H          |   |
| H | 0  | -3.01974000 | 4.27099300  | 2.93654400  | H | 0  | -3.05151300  | 1.44377800   | -0.96370100 | H          |   |
| H | 0  | -2.61627100 | 5.77902400  | 3.80116900  | H | 0  | -2.41249500  | -0.75831900  | -2.54873500 | H          |   |
| H | 0  | 0.19476700  | 2.84141600  | 2.97447300  | H | 0  | -1.759325000 | 11.12441500  | 3.62169500  | L          |   |
| H | 0  | 0.57245200  | 4.78772200  | 1.88882400  | H | -1 | 8.48306100   | 0.80956500   | -6.13881700 | L          |   |
| H | 0  | 0.45148500  | 7.17355600  | 1.94163000  | H | -1 | 7.71813400   | -7.00529800  | 1.26106600  | L          |   |
| H | 0  | -0.83031400 | 7.13942600  | 2.99898400  | H | -1 | 1.05179900   | -8.16488900  | 0.58641500  | L          |   |
| H | -1 | -4.74439600 | 7.41591200  | -1.04378900 | L | -1 | -2.59457900  | -7.73037000  | 3.83978300  | L          |   |
| H | -1 | -3.63967400 | 8.37210700  | -0.05122900 | L | -1 | -10.35096300 | -2.00703900  | 3.78228700  | L          |   |
| H | -1 | -3.44381600 | 7.89032300  | 2.42648600  | L | -1 | -10.14488700 | 6.99092600   | -3.33990200 | L          |   |
| H | -1 | -6.31604700 | 5.84202500  | -0.00789200 | L | -1 | 5.57931800   | 11.31665100  | 3.31800200  | L          |   |
| H | -1 | -4.68687900 | 7.22471000  | 4.46809800  | L | -1 | -1.96263600  | 6.73566300   | -4.96223800 | L          |   |
| H | -1 | -7.56570400 | 5.17145300  | 2.00076000  | L | -1 | 5.59730100   | -0.74402700  | 5.37668800  | L          |   |
| H | -1 | -7.64476400 | 5.26913700  | 4.22166100  | L | -1 | 4.27998400   | -7.47352000  | -3.99604200 | L          |   |
| H | -1 | -3.37302600 | 5.33167000  | -0.65959600 | L | -1 | -6.55585000  | -6.24921400  | -4.64275500 | L          |   |
| H | 0  | -1.69587700 | 7.18150900  | 1.05004300  | H | -1 | 1.60849300   | -1.85797800  | 7.42710100  | L          |   |
| H | 0  | 1.27744400  | 5.00178100  | -4.29565200 | H | -1 | -5.84469600  | -5.42426500  | 6.73602300  | L          |   |
| H | 0  | 1.12197700  | 4.78110100  | -2.56662500 | H | -1 | -9.00458900  | -3.56213000  | -0.60660200 | L          |   |
| H | -1 | 0.18347600  | 6.95244700  | -3.02677500 | L | N  | -1           | 9.98183400   | 2.22730300  | 2.43439000 | L |

|   |    |             |             |             |         |   |    |             |             |             |        |
|---|----|-------------|-------------|-------------|---------|---|----|-------------|-------------|-------------|--------|
| C | -1 | 8.62036300  | 1.70648200  | 2.16691800  | L H 370 | C | -1 | -8.50224800 | -0.40461900 | 4.08271600  | L H 58 |
| C | 0  | 8.29776600  | 1.83861800  | 0.66783300  | H       | C | 0  | -7.47916400 | 0.05499100  | 3.03830900  | H      |
| C | 0  | 6.94686200  | 1.30771800  | 0.29267100  | H       | C | 0  | -6.39225100 | 0.98406800  | 3.57640100  | H      |
| N | 0  | 6.79095400  | 0.00980800  | -0.16146600 | H       | C | 0  | -5.13235300 | 0.49716800  | 3.94828700  | H      |
| C | 0  | 5.50949600  | -0.18318400 | -0.46595200 | H       | C | 0  | -4.09460600 | 1.33975200  | 4.34915700  | H      |
| N | 0  | 4.83631000  | 0.94546000  | -0.21942300 | H       | C | 0  | -4.28637800 | 2.72921100  | 4.37321700  | H      |
| C | 0  | 5.70711900  | 1.88801700  | 0.26784200  | H       | O | 0  | -3.32122200 | 3.61576400  | 4.71640300  | H      |
| C | -1 | 8.55124500  | 0.22022100  | 2.61594400  | L       | C | 0  | -5.55039500 | 3.23593100  | 4.02184800  | H      |
| O | -1 | 7.54169100  | -0.19959800 | 3.18024100  | L       | C | 0  | -6.57293300 | 2.37771300  | 3.62527500  | H      |
| N | -1 | 9.57330000  | -0.55591700 | 2.26616700  | L       | C | -1 | -9.02525900 | 0.82764200  | 4.83403900  | L      |
| C | -1 | 9.57668600  | -1.98683800 | 2.48854300  | L H 380 | O | -1 | -9.92025200 | 1.54619800  | 4.31805400  | L      |
| C | 0  | 8.82796600  | -2.76834200 | 1.39003300  | H       | N | -1 | -7.51781700 | 10.42401100 | -1.54713400 | L      |
| C | 0  | 9.36184100  | -2.44304600 | -0.05172900 | H       | C | -1 | -6.19051300 | 10.20052600 | -2.13794100 | L      |
| O | 0  | 10.17399100 | -3.22777800 | -0.54529900 | H       | C | -1 | -5.86479600 | 8.71174700  | -2.22831800 | L      |
| O | 0  | 8.91148800  | -1.35885100 | -0.58225500 | H       | C | -1 | -5.43371800 | 8.15683000  | -0.91353800 | L      |
| C | -1 | 10.98133000 | -2.55030600 | 2.61863300  | L       | C | -1 | -5.68404100 | 8.69661400  | 0.33766900  | L      |
| O | -1 | 11.97706300 | -1.82087000 | 2.37366300  | L       | N | -1 | -5.11767400 | 7.93363800  | 1.30789500  | L      |
| H | 0  | 9.05163400  | 1.29691900  | 0.06215000  | H       | C | -1 | -4.49825000 | 6.85010800  | 0.72343300  | L      |
| H | 0  | 8.34595600  | 2.90562900  | 0.37322300  | H       | C | -1 | -4.68673600 | 6.95255900  | -0.67586000 | L      |
| H | 0  | 5.35944500  | 2.86409300  | 0.58021000  | H       | C | -1 | -4.11910500 | 5.97308300  | -1.51143000 | L      |
| H | 0  | 3.80224200  | 1.04997200  | -0.25868500 | H       | C | -1 | -3.41650900 | 4.93797400  | -0.92051500 | L      |
| H | 0  | 5.06022300  | -1.09237800 | -0.83287500 | H       | C | -1 | -3.26960600 | 4.84031700  | 0.46634000  | L      |
| H | -1 | 7.86151000  | 2.27132900  | 2.76679800  | H       | C | -1 | -3.79308800 | 5.79394100  | 1.31040800  | L      |
| H | -1 | 10.43960000 | 2.51832700  | 1.59538600  | L       | C | -1 | -6.04682100 | 10.89565600 | -3.48889300 | L      |
| H | -1 | 9.92910800  | 2.99701700  | 3.06544500  | L       | N | 0  | 0.40645900  | 6.47333100  | -2.68729000 | H      |
| H | 0  | 8.95176200  | -3.85458100 | 1.56179900  | H       | C | 0  | 0.69397400  | 5.14046900  | -2.14105000 | H      |
| H | 0  | 7.74211500  | -2.54145400 | 1.45377800  | H       | C | 0  | 1.30051800  | 4.25472100  | -3.28277400 | H      |
| H | -1 | 9.03972600  | -2.20704100 | 3.44854500  | L       | O | 0  | 1.14785600  | 2.87863600  | -3.02117900 | H      |
| H | -1 | 10.24749000 | -0.21405200 | 1.61110200  | L       | C | 0  | 2.78621300  | 4.49550600  | -3.53731100 | H      |
| H | -1 | 11.09819600 | -3.60291300 | 2.90313000  | L       | C | 0  | 1.55417700  | 5.07170200  | -0.86557200 | H      |
| H | 0  | 7.64108400  | -0.68848400 | -0.28254300 | H       | O | 0  | 1.65347200  | 4.03002200  | -0.22043300 | H      |
| H | 0  | -3.22426800 | -1.06204800 | 0.95661700  | H       | N | 0  | 2.20118500  | 6.22427100  | -0.51547600 | H      |
| H | 0  | -3.75049000 | -1.03299500 | -0.68546600 | H       | C | -1 | 3.15978200  | 6.29655200  | 0.64870700  | L H 88 |
| N | 0  | -3.99826600 | -1.09770700 | 0.30090300  | H       | C | -1 | 4.30600300  | 7.24997600  | 0.30644600  | L      |

# Glc\_R786A

ONIOM: extrapolated energy = -3107.380446 au

|   |    |             |             |             |        |   |    |             |             |             |         |
|---|----|-------------|-------------|-------------|--------|---|----|-------------|-------------|-------------|---------|
| N | -1 | -2.95754900 | -7.67326700 | -2.01224200 | L      | O | -1 | 6.62764100  | 5.90876600  | -3.08883200 | L       |
| C | -1 | -1.78294400 | -6.84172100 | -1.87204200 | L      | O | -1 | 7.37512700  | 5.48596100  | -4.18333200 | L       |
| C | -1 | -2.15962000 | -5.70549000 | -1.06432900 | L H 4  | C | -1 | 7.01841400  | 5.57347200  | -1.81345000 | L       |
| C | 0  | -1.08831900 | -4.52202600 | -0.84811800 | H      | C | -1 | 6.25785100  | 6.00162100  | -0.72300100 | L       |
| C | 0  | -1.51991100 | -3.46956900 | 0.24151500  | H      | C | -1 | 2.33973700  | 6.77499300  | 1.84566000  | L       |
| O | 0  | -2.71187500 | -3.04122700 | 0.21028800  | H      | O | -1 | 2.38079800  | 7.95957700  | 2.22235400  | L       |
| O | 0  | -0.61645300 | -3.09464900 | 1.03874600  | H      | N | -1 | 1.60771700  | 5.83678600  | 2.44619300  | L       |
| C | -1 | -0.70042500 | -7.60703100 | -1.10023000 | L      | C | -1 | 0.49854500  | 6.14955500  | 3.38396700  | L H 102 |
| O | -1 | 0.50146900  | -7.53762100 | -1.46656900 | L      | C | 0  | -0.43744400 | 4.93600000  | 3.46953100  | H       |
| N | -1 | -1.67455300 | -7.07812700 | 5.21295500  | L      | C | 0  | 0.14779300  | 3.66344400  | 4.18371800  | H       |
| C | -1 | -2.65601900 | -6.07115800 | 4.86285300  | L      | O | 0  | 1.38407800  | 3.58055800  | 4.37413000  | H       |
| C | -1 | -1.98089300 | -4.80719000 | 4.29196200  | L      | O | 0  | -0.73880100 | 2.79955800  | 4.47534400  | H       |
| C | -1 | -0.69804200 | -4.35270900 | 4.96906200  | L      | C | -1 | 0.92369800  | 6.62304100  | 4.76274200  | L       |
| C | -1 | -0.59590800 | -4.26302900 | 6.34856900  | L      | O | -1 | 0.04151100  | 6.78535600  | 5.64533200  | L       |
| C | -1 | 0.57352700  | -3.81093400 | 6.95221400  | L      | N | -1 | 8.93424600  | 5.64298600  | 5.80418100  | L       |
| C | -1 | 1.63867800  | -3.40881600 | 6.16507500  | L      | C | -1 | 8.80841800  | 5.24189200  | 4.39161600  | L       |
| O | -1 | 2.81007600  | -2.95793400 | 6.71776600  | L      | C | -1 | 7.41616900  | 5.55756300  | 3.86996900  | L       |
| C | -1 | 1.55304500  | -3.48242900 | 4.78752600  | L      | C | -1 | 6.35133700  | 4.63345300  | 4.45338400  | L       |
| C | -1 | 0.38831700  | -3.94240100 | 4.20274000  | L      | C | -1 | 4.96597100  | 4.92951800  | 3.95279000  | L       |
| C | -1 | -3.56879200 | -6.71368200 | 3.83035400  | L      | O | -1 | 4.67948900  | 6.03129600  | 3.46602200  | L       |
| O | -1 | -3.31480100 | -6.59254100 | 2.60382000  | L      | N | -1 | 4.07581400  | 3.94051000  | 4.06905000  | L       |
| N | -1 | -6.03619900 | -7.05938900 | 1.67777600  | L      | C | -1 | 9.88633800  | 5.90399600  | 3.52788200  | L       |
| C | -1 | -6.89304500 | -6.29299600 | 0.78004500  | L      | O | -1 | 10.36042000 | 5.29288600  | 2.53522800  | L       |
| C | -1 | -6.51342500 | -4.81605200 | 0.81002700  | L      | N | -1 | 11.57138600 | 0.34621600  | -1.44241400 | L       |
| C | -1 | -6.45498000 | -4.25629500 | 2.20752300  | L      | C | -1 | 10.38834900 | -0.41167500 | -1.82224700 | L       |
| C | -1 | -7.54448200 | -4.42782700 | 3.06838400  | L      | C | -1 | 9.18647000  | 0.49770000  | -2.09295800 | L       |
| C | -1 | -7.50932200 | -3.95776900 | 4.36049500  | L      | C | -1 | 8.51670700  | 1.01745500  | -0.84498300 | L       |
| C | -1 | -6.37715800 | -3.32076300 | 4.80492500  | L      | C | -1 | 9.03058500  | 1.02339200  | 0.43013100  | L       |
| O | -1 | -6.39227800 | -2.85264700 | 6.09190300  | L      | N | -1 | 8.13129500  | 1.61810100  | 1.29193700  | L       |
| C | -1 | -5.27876700 | -3.13566500 | 3.99448600  | L      | C | -1 | 7.02820700  | 2.02181700  | 0.58513800  | L       |
| C | -1 | -5.31838400 | -3.60598800 | 2.68630900  | L      | C | -1 | 7.23050100  | 1.65174000  | -0.76268200 | L       |
| C | -1 | -6.70484400 | -6.78769600 | -0.64964800 | L      | C | -1 | 6.23942000  | 1.93915600  | -1.69925200 | L       |
| O | -1 | -5.54570600 | -6.95155400 | -1.11129800 | L      | C | -1 | 5.07533800  | 2.55191500  | -1.28261000 | L       |
| N | -1 | -5.39267300 | -3.91448600 | -4.32191700 | L      | C | -1 | 4.88192800  | 2.89380200  | 0.08577200  | L       |
| C | -1 | -5.11086200 | -2.55369500 | -3.92077000 | L      | C | -1 | 5.85782700  | 2.64311600  | 1.01858200  | L       |
| C | -1 | -4.11171600 | -2.53010300 | -2.78856500 | L      | C | -1 | 10.76619300 | -1.22488700 | -3.04447000 | L       |
| O | -1 | -4.65794200 | -3.28029200 | -1.69479600 | L      | O | -1 | 11.19914500 | -0.64734100 | -4.07527900 | L       |
| C | -1 | -3.81553300 | -1.10358900 | -2.34168900 | L      | N | -1 | 7.31638400  | -5.82784700 | 0.64841300  | L       |
| C | -1 | -4.57703900 | -1.74471800 | -5.11571500 | L      | C | -1 | 7.19647700  | -4.42903300 | 0.23036300  | L       |
| O | -1 | -3.49037000 | -2.06998400 | -5.66062100 | L      | C | -1 | 6.15215000  | -3.70621900 | 1.09343500  | L H 134 |
| N | -1 | -3.41193200 | 1.32869300  | -5.78630600 | L      | C | 0  | 6.17724200  | -2.19193300 | 0.96979300  | H       |
| C | -1 | -2.17208400 | 2.14483400  | -5.81108100 | L H 43 | C | 0  | 5.37163300  | -1.68295900 | -0.24828900 | H       |
| C | 0  | -2.04987300 | 3.15339300  | -4.66700500 | H      | O | 0  | 5.76986300  | -1.98759800 | -1.40191300 | H       |
| C | 0  | -2.37642100 | 2.50591000  | -3.29256600 | H      | O | 0  | 4.36174100  | -0.97741600 | 0.03916300  | H       |
| O | 0  | -3.55010700 | 2.11644500  | -3.13598400 | H      | C | -1 | 8.54926200  | -3.70158300 | 0.36893300  | L       |
| O | 0  | -1.41616600 | 2.42833800  | -2.44985800 | H      | O | -1 | 9.04663800  | -3.10410200 | -0.62061500 | L       |
| C | -1 | -0.93941300 | 1.20759200  | -5.84201800 | L      | N | -1 | 9.42428100  | -5.08295400 | 5.92164300  | L       |
| O | -1 | 0.13974700  | 1.65818400  | -6.25875000 | L      | C | -1 | 8.00338500  | -4.86254600 | 6.18881500  | L       |
| N | -1 | -1.12480400 | -0.04677000 | -5.43463200 | L      | C | -1 | 7.68900100  | -3.37864900 | 6.28651300  | L       |
| C | -1 | -0.10020700 | -1.10040300 | -5.49982400 | L      | C | -1 | 7.17012300  | -5.50796600 | 5.06359200  | L       |
| C | -1 | -0.30152500 | -2.13452900 | -4.35964500 | L      | O | -1 | 7.40104700  | -5.21418000 | 3.86195400  | L       |
| C | -1 | 0.70923900  | -3.25877000 | -4.45800200 | L      | N | -1 | 4.48564300  | -9.79970500 | -0.95450000 | L       |
| C | -1 | -0.15696900 | -1.45059200 | -2.99990600 | L      | C | -1 | 3.88242000  | -8.53220700 | -1.37010200 | L       |
| C | -1 | -0.12130900 | -1.85219900 | -6.84109200 | L      | C | -1 | 4.72805400  | -7.36264300 | -0.82390900 | L       |
| O | -1 | 0.95960800  | -2.15125600 | -7.41184000 | L      | C | -1 | 3.91375000  | -6.09828500 | -0.64605400 | L       |
| N | -1 | -9.57259800 | -1.19239000 | 3.50439800  | L      | C | -1 | 3.04651900  | -5.93639900 | 0.44682700  | L       |
|   |    |             |             |             |        | C | -1 | 2.26335200  | -4.81582400 | 0.57441300  | L       |

|   |    |              |             |             |   |   |    |             |             |             |   |
|---|----|--------------|-------------|-------------|---|---|----|-------------|-------------|-------------|---|
| C | -1 | 2.33039300   | -3.83201800 | -0.37973500 | L | H | -1 | -3.68115000 | 5.69209800  | 2.40003900  | L |
| O | -1 | 1.55685800   | -2.71970100 | -0.26662000 | L | H | -1 | -2.70677400 | 3.99231500  | 0.88254800  | L |
| C | -1 | 3.17150900   | -3.96867900 | -1.47118100 | L | H | -1 | -5.45638400 | 10.69173800 | -1.44751800 | L |
| C | -1 | 3.96831300   | -5.09358600 | -1.57747900 | L | H | -1 | -8.21990300 | 9.94170600  | -2.06925900 | L |
| C | -1 | 3.71597800   | -8.44527500 | -2.89123700 | L | H | -1 | -7.72167000 | 11.40163300 | -1.54418100 | L |
| O | -1 | 4.58873400   | -8.94272500 | -3.64913700 | L | H | 0  | 0.73001700  | 4.55481700  | -4.17649000 | H |
| N | -1 | 3.63165600   | -5.67089400 | -4.99946400 | L | H | 0  | 3.09877600  | 3.95750700  | -4.43891000 | H |
| C | -1 | 4.32567000   | -4.62257800 | -5.73112000 | L | H | 0  | 3.37866800  | 4.10600600  | -2.69620200 | H |
| C | -1 | 4.67154600   | -3.43501900 | -4.80824400 | L | H | 0  | 3.02613700  | 5.56056500  | -3.67523500 | H |
| C | -1 | 4.50693200   | -2.10791900 | -5.50879300 | L | H | 0  | 0.17792800  | 2.67097100  | -2.84906900 | H |
| C | 0  | 5.08827500   | -0.93606200 | -4.71520700 | H | H | 0  | -0.26511800 | 4.67744400  | -1.88479000 | H |
| N | 0  | 4.42715300   | -0.72165900 | -3.44051900 | H | H | 0  | -0.04534400 | 7.06853600  | -1.99718500 | H |
| C | 0  | 3.41202200   | 0.12645400  | -3.20038700 | H | H | 0  | 1.24722600  | 6.94068600  | -3.02227000 | H |
| N | 0  | 2.86259800   | 0.86294300  | -4.20152200 | H | H | -1 | 4.96816000  | 7.33823500  | 1.19152200  | L |
| N | 0  | 3.00577400   | 0.28411400  | -1.95225100 | H | H | -1 | 3.93060800  | 8.27582100  | 0.11249200  | L |
| C | -1 | 5.55679600   | -5.05531400 | -6.53634600 | L | H | -1 | 3.85400400  | 7.71387400  | -2.35487600 | L |
| O | -1 | 5.74208600   | -4.60151700 | -7.69532200 | L | H | -1 | 6.56589700  | 5.70875500  | 0.29022600  | L |
| C | 0  | -0.59669900  | -0.40258400 | 3.10221900  | H | H | -1 | 5.18913600  | 6.96286300  | -4.30675400 | L |
| O | 0  | -0.99648200  | -0.09993100 | 4.41399000  | H | H | -1 | 7.90585300  | 4.95380300  | -1.62825100 | L |
| C | 0  | -1.60843300  | 0.16271700  | 2.06403900  | H | H | -1 | 8.09970700  | 4.97574400  | -3.84413400 | L |
| O | 0  | -2.73877500  | -0.69184100 | 1.93793700  | H | H | -1 | 3.58583800  | 5.26152800  | 0.80577200  | L |
| O | 0  | 0.70765800   | 0.15261400  | 2.98920100  | H | H | 0  | 2.05435700  | 7.06130000  | -1.07085500 | H |
| C | 0  | 1.28914100   | 0.34419500  | 1.70875600  | H | H | 0  | -1.37888000 | 5.21442700  | 3.98438500  | H |
| C | 0  | 0.34710500   | 1.19767400  | 0.84452200  | H | H | 0  | -0.76067000 | 4.61626800  | 2.45468800  | H |
| O | 0  | 0.86847900   | 1.42064100  | -0.47495000 | H | H | -1 | -0.06115000 | 7.01015900  | 2.93201800  | L |
| C | 0  | -1.00763200  | 0.51574200  | 0.70086000  | H | H | -1 | 2.07167100  | 4.95876900  | 2.62656000  | L |
| O | 0  | -1.93291000  | 1.40175000  | 0.05378400  | H | H | -1 | 7.40785700  | 5.46583300  | 2.76218100  | L |
| C | 0  | 2.63593300   | 1.02707400  | 1.96781300  | H | H | -1 | 7.14484100  | 6.61590300  | 4.07164200  | L |
| O | 0  | 3.63761400   | 0.14321500  | 2.44875700  | H | H | -1 | 6.63613000  | 3.57930300  | 4.23704000  | L |
| H | -1 | -2.56174600  | -5.88660400 | -0.07529300 | L | H | -1 | 6.35300100  | 4.72057400  | 5.56019200  | L |
| H | -1 | -3.01227600  | -5.08018500 | -1.58516800 | L | H | -1 | 4.30487700  | 3.18542200  | 4.67157300  | L |
| H | 0  | -0.12136900  | -4.96483900 | -0.53418100 | H | H | -1 | 3.07246200  | 4.04874200  | 3.88208800  | L |
| H | 0  | -0.88798300  | -3.93959200 | -1.78272600 | H | H | -1 | 8.96466400  | 4.13271400  | 4.37133900  | L |
| H | -1 | -1.41685200  | -6.56003300 | -2.88936500 | L | H | -1 | 9.86882800  | 5.48483600  | 6.11754000  | L |
| H | -1 | -3.33245500  | -7.91392700 | -1.11774900 | L | H | -1 | 8.70606800  | 6.60932100  | 5.91620800  | L |
| H | -1 | -3.64350300  | -7.21608400 | -2.57455700 | L | H | -1 | 8.42665600  | -0.07065400 | -2.66842400 | L |
| H | -1 | -1.75941000  | -4.93892300 | 3.21157800  | L | H | -1 | 9.46867700  | 1.36156500  | -2.72947900 | L |
| H | -1 | -2.71253400  | -3.96936600 | 4.34400200  | L | H | -1 | 10.01661100 | 0.67886200  | 0.75303800  | L |
| H | -1 | -1.44416400  | -4.55716300 | 6.97840200  | L | H | -1 | 8.12672100  | 1.46219800  | 2.26814100  | L |
| H | -1 | 0.33413800   | -3.98293600 | 3.10591000  | L | H | -1 | 6.39476700  | 1.67040600  | -2.74987600 | L |
| H | -1 | 0.62290300   | -3.75656600 | 8.04676700  | L | H | -1 | 4.29006900  | 2.83112200  | -2.00274500 | L |
| H | -1 | 2.38617000   | -3.16703600 | 4.14758800  | L | H | -1 | 5.71993900  | 2.91999900  | 2.07087000  | L |
| H | -1 | 2.70368300   | -2.97455900 | 7.66151400  | L | H | -1 | 3.94554500  | 3.39670900  | 0.38004200  | L |
| H | -1 | -3.23393200  | -5.81063100 | 5.78326100  | L | H | -1 | 10.14608800 | -1.09566400 | -0.97120900 | L |
| H | -1 | -2.12554100  | -7.91937300 | 5.50753700  | L | H | -1 | 12.35648200 | -0.26617000 | -1.35713700 | L |
| H | -1 | -1.06957500  | -7.27033200 | 4.44188500  | L | H | -1 | 11.77559400 | 1.05540500  | -2.11700800 | L |
| H | -1 | -5.53608900  | -4.65524900 | 0.30517600  | L | H | -1 | 6.33250500  | -3.93734800 | 2.16404400  | L |
| H | -1 | -7.24937700  | -4.21667200 | 0.22753200  | L | H | -1 | 5.14180900  | -4.09800400 | 0.84733900  | L |
| H | -1 | -8.46046800  | -4.90009200 | 2.68823500  | L | H | 0  | 5.74610900  | -1.73550600 | 1.87588400  | H |
| H | -1 | -4.45261600  | -3.44622700 | 2.03281400  | L | H | 0  | 7.21496700  | -1.81164100 | 0.87433200  | H |
| H | -1 | -8.39664300  | -4.06651800 | 4.99925800  | L | H | -1 | 6.86769000  | -4.43242500 | -0.84076600 | L |
| H | -1 | -4.38852200  | -2.60616300 | 4.36429300  | L | H | -1 | 6.62690600  | -6.06575100 | 1.33343500  | L |
| H | -1 | -7.27821300  | -2.94843100 | 6.42178000  | L | H | -1 | 8.22237300  | -6.00951600 | 1.03069200  | L |
| H | -1 | -7.95354000  | -6.44439300 | 1.09956700  | L | H | -1 | 8.36437700  | -2.89711400 | 7.02588700  | L |
| H | -1 | -6.13896000  | -6.70616900 | 2.60904500  | L | H | -1 | 7.90176200  | -2.87516800 | 5.31981000  | L |
| H | -1 | -5.07705300  | -6.98619000 | 1.39785400  | L | H | -1 | 7.76278000  | -5.37444400 | 7.15319400  | L |
| H | -1 | -3.14895600  | -3.02481100 | -3.09728900 | L | H | -1 | 9.97279200  | -4.69404800 | 6.65956700  | L |
| H | -1 | -3.11891600  | -1.06777000 | -1.49079600 | L | H | -1 | 9.69192000  | -4.67135700 | 5.05173000  | L |
| H | -1 | -4.73597800  | -0.57379400 | -2.06078200 | L | H | -1 | 5.16126700  | -7.62363700 | 0.16504200  | L |
| H | -1 | -3.35573300  | -0.52033600 | -3.15584200 | L | H | -1 | 5.59210900  | -7.15993300 | -1.48777200 | L |
| H | -1 | -3.97508900  | -3.29457800 | -1.02926400 | L | H | -1 | 2.98847000  | -6.73397800 | 1.19660400  | L |
| H | -1 | -6.06325400  | -2.04499900 | -3.58442300 | L | H | -1 | 4.55190100  | -4.78750700 | -2.48210000 | L |
| H | -1 | -4.76626700  | -4.57518900 | -3.90909500 | L | H | -1 | 1.60373400  | -4.71544000 | 1.45019300  | L |
| H | -1 | -6.32886900  | -4.14800300 | -4.06613700 | L | H | -1 | 3.26232000  | -3.18022900 | -2.23830300 | L |
| H | 0  | -1.04124000  | 3.60483300  | -4.67372300 | H | H | -1 | 1.06028500  | -2.76584600 | 0.55189400  | L |
| H | 0  | -2.78140300  | 3.97149500  | -4.81950700 | H | H | -1 | 2.86149300  | -8.49815900 | -0.91189200 | L |
| H | -1 | -2.14664200  | 2.73986000  | -6.75821700 | L | H | -1 | 4.62150700  | -9.79595100 | 0.03588200  | L |
| H | -1 | -3.83566300  | 1.39077600  | -4.86480700 | L | H | -1 | 5.36608900  | -9.93794400 | -1.40594000 | L |
| H | -1 | -4.04674300  | 1.67698300  | -6.47125100 | L | H | -1 | 5.71134600  | -3.54524900 | -4.43205500 | L |
| H | -1 | -1.32999000  | -2.57342800 | -4.43888900 | L | H | -1 | 4.03911100  | -3.44270100 | -3.87771100 | L |
| H | -1 | 0.58441000   | -3.97151100 | -3.62897700 | L | H | -1 | 4.99361500  | -2.14227700 | -6.50657700 | L |
| H | -1 | 1.74428600   | -2.88366500 | -4.40806000 | L | H | -1 | 3.43034900  | -1.92093300 | -5.72323500 | L |
| H | -1 | 0.61236800   | -3.83240800 | -5.39203000 | L | H | 0  | 6.15573300  | -1.12376400 | -4.49098300 | H |
| H | -1 | -0.32799400  | -2.19577500 | -2.19810100 | L | H | 0  | 5.04745300  | -0.00630400 | -5.31653200 | H |
| H | -1 | 0.84817800   | -1.03739000 | -2.85186900 | L | H | 0  | 4.83735400  | -1.23206200 | -2.62034500 | H |
| H | -1 | -0.88213200  | -0.63913800 | -2.83608700 | L | H | 0  | 3.51383300  | -0.21149900 | -1.18675000 | H |
| H | -1 | 0.91006900   | -0.62814500 | -5.36755000 | L | H | 0  | 2.13414500  | 0.75158400  | -1.68758800 | H |
| H | -1 | -1.91871300  | -0.25779200 | -4.86065800 | L | H | 0  | 2.83335700  | 0.47853200  | -5.13507900 | H |
| H | 0  | -7.01413600  | -0.84577600 | 2.60133400  | H | H | 0  | 2.12819000  | 1.53023600  | -3.93832700 | H |
| H | 0  | -8.01224500  | 0.54449200  | 2.20337200  | H | H | -1 | 3.56749700  | -4.16337800 | -6.43837600 | L |
| H | 0  | -4.92632400  | -0.57174700 | 3.89020400  | H | H | -1 | 3.90019000  | -5.60576500 | -4.03597000 | L |
| H | 0  | -7.53287100  | 2.80172800  | 3.32350900  | H | H | -1 | 2.54302500  | -4.99806100 | -5.27127900 | L |
| H | 0  | -3.12742900  | 0.91055400  | 4.59337300  | H | H | 0  | -0.56504700 | -1.49497600 | 2.99975000  | H |
| H | 0  | -5.69301600  | 4.31536900  | 4.02753500  | H | H | 0  | -0.75806200 | 0.85143200  | 4.53910100  | H |
| H | 0  | -2.40025500  | 3.22005100  | 4.65967100  | H | H | 0  | -1.98493400 | 1.10261500  | 2.48232500  | H |
| H | -1 | -7.99672900  | -1.06665900 | 4.83351700  | L | H | 0  | -2.48602700 | -1.52234000 | 1.46351600  | H |
| H | -1 | -10.33828700 | -1.23536200 | 4.14440800  | L | H | 0  | 1.45712900  | -0.62227400 | 1.20438400  | H |
| H | -1 | -9.88121500  | -0.83580400 | 2.62312800  | L | H | 0  | 0.20222200  | 2.16540200  | 1.34058100  | H |
| H | -1 | -6.73131000  | 8.12946000  | -2.60507400 | L | H | 0  | 1.11506300  | 2.36345900  | -0.54198600 | H |
| H | -1 | -5.05203600  | 8.55022200  | -2.96605000 | L | H | 0  | -0.87581600 | -0.39871800 | 0.10304300  | H |
| H | -1 | -6.24272700  | 9.60963900  | 0.56338600  | L | H | 0  | -1.63827700 | 1.63698700  | -0.86476900 | H |
| H | -1 | -5.33957200  | 7.99011900  | 2.26913000  | L | H | 0  | 2.47295500  | 1.79586200  | 2.73111900  | H |
| H | -1 | -4.23255500  | 6.04073300  | -2.59743900 | L | H | 0  | 2.96449500  | 1.52442800  | 1.03881000  | H |
| H | -1 | -2.95726800  | 4.16702800  | -1.55502600 | L | H | 0  | 3.91693500  | -0.37531300 | 1.66220500  | H |

|   |    |              |             |             |         |   |    |             |             |             |        |
|---|----|--------------|-------------|-------------|---------|---|----|-------------|-------------|-------------|--------|
| O | -1 | -7.05584100  | 11.05910100 | -4.22288100 | L       | C | 0  | -1.77865600 | 2.36259600  | -5.27509600 | H      |
| H | -1 | -8.60363400  | 1.09120100  | 5.81209600  | L       | C | 0  | -2.11436300 | 1.99566500  | -3.80499200 | H      |
| H | -1 | -7.58396400  | -6.97762600 | -1.27802200 | L       | O | 0  | -3.31457000 | 1.81095900  | -3.54020900 | H      |
| H | -1 | -0.97967100  | -8.20645400 | -0.22297100 | L       | O | 0  | -1.12479100 | 1.90820200  | -2.98919900 | H      |
| H | -1 | 2.83437900   | -7.93215600 | -3.29657900 | L       | C | -1 | -1.01024900 | 0.10295600  | -6.11310700 | L      |
| H | -1 | 10.66607600  | -2.31848500 | -3.02726700 | L       | O | -1 | 0.10720000  | 0.30864300  | -6.61339400 | L      |
| H | -1 | 10.23709900  | 6.91557000  | 3.77564700  | L       | N | -1 | -1.36275700 | -1.02236800 | -5.49412200 | L      |
| H | -1 | -5.05728500  | 11.23341600 | -3.82226300 | L       | C | -1 | -0.50730000 | -2.21456400 | -5.38898900 | L      |
| H | -1 | 1.97970800   | 6.82868400  | 4.98159600  | L       | C | -1 | -0.81597200 | -2.99970300 | -4.08582700 | L      |
| H | -1 | -5.15834100  | -0.88817700 | -5.48215600 | L       | C | -1 | 0.01420100  | -4.26416500 | -4.00107200 | L      |
| H | -1 | -4.42640900  | -7.31678900 | 4.16184100  | L       | C | -1 | -0.52207500 | -2.12664900 | -2.86560000 | L      |
| H | -1 | 6.38006200   | -6.22218700 | 5.32566400  | L       | C | -1 | -0.68846000 | -3.16927600 | -6.58077300 | L      |
| H | -1 | -1.08792500  | -2.12568900 | -7.28658100 | L       | O | -1 | 0.31481500  | -3.71998600 | -7.10396300 | L      |
| H | -1 | 6.26370600   | -5.77000800 | -6.09558200 | L       | N | -1 | -9.54944900 | 0.64221600  | 3.60484400  | L      |
| H | -1 | 9.07329400   | -3.70645100 | 1.33506800  | L       | C | -1 | -8.35420100 | 1.34503300  | 4.02689200  | L H 58 |
| N | -1 | -9.64046600  | 2.24093900  | -2.86887500 | L       | C | 0  | -7.31992400 | 1.45319600  | 2.90222900  | H      |
| C | -1 | -8.30273200  | 1.71052500  | -2.51463500 | L H 328 | C | 0  | -6.08785700 | 2.28573500  | 3.24877000  | H      |
| C | 0  | -8.03235600  | 1.88049500  | -1.00786300 | L       | C | 0  | -4.91295600 | 1.69136500  | 3.72517500  | H      |
| C | 0  | -6.69246100  | 1.36216500  | -0.56502700 | H       | C | 0  | -3.75111200 | 2.42851000  | 3.95939700  | H      |
| N | 0  | -6.56300900  | 0.09420100  | -0.02072200 | H       | C | 0  | -3.72691800 | 3.80466400  | 3.69808900  | H      |
| C | 0  | -5.29274000  | -0.09100700 | 0.34464500  | H       | O | 0  | -2.62278900 | 4.58119800  | 3.86938500  | H      |
| N | 0  | -4.60124000  | 1.01137100  | 0.04663600  | H       | C | 0  | -4.89876600 | 4.42271200  | 3.23463700  | H      |
| C | 0  | -5.44501300  | 1.92671500  | -0.53237800 | H       | C | 0  | -6.04924600 | 3.67073100  | 3.01059100  | H      |
| C | -1 | -8.23396300  | 0.20920100  | -2.91047300 | L       | C | -1 | -8.66214500 | 2.75079900  | 4.56120200  | L      |
| O | -1 | -7.20359600  | -0.24332200 | -3.40790200 | L       | O | -1 | -9.46032500 | 3.49926000  | 3.93968000  | L      |
| N | -1 | -9.28454000  | -0.54047200 | -2.58855800 | L       | N | -1 | -5.99842200 | 10.79745200 | -3.39103100 | L      |
| C | -1 | -9.29888000  | -1.97786000 | -2.76372200 | L H 366 | C | -1 | -4.74124400 | 10.27973400 | -3.94978600 | L      |
| C | 0  | -8.63490700  | -2.72895700 | -1.59139800 | L       | C | -1 | -4.64148800 | 8.76508300  | -3.78668600 | L      |
| C | 0  | -9.26321000  | -2.32078400 | -0.20418700 | H       | C | -1 | -4.24815200 | 8.38050000  | -2.40112000 | L      |
| O | 0  | -10.15072200 | -3.05482500 | 0.24566300  | H       | C | -1 | -4.36978700 | 9.15457900  | -1.25851200 | L      |
| O | 0  | -8.80844200  | -1.23710600 | 0.30718600  | H       | N | -1 | -3.88610100 | 8.48892600  | -0.17814400 | L      |
| C | -1 | -10.70368300 | -2.52580900 | -2.94747000 | L       | C | -1 | -3.45480600 | 7.24152500  | -0.57474800 | L      |
| O | -1 | -11.69912000 | -1.77478900 | -2.77822600 | L       | C | -1 | -3.67800000 | 7.13447500  | -1.96858100 | L      |
| H | 0  | -8.80700900  | 1.35151800  | -0.41742800 | H       | C | -1 | -3.29192600 | 5.95403000  | -2.62983100 | L      |
| H | 0  | -8.09307400  | 2.95489900  | -0.74218300 | H       | C | -1 | -2.72766700 | 4.93890500  | -1.87789600 | L      |
| H | 0  | -5.07248800  | 2.87376400  | -0.89904200 | H       | C | -1 | -2.54533300 | 5.05481800  | -0.49666400 | L      |
| H | 0  | -3.55565200  | 1.10343700  | 0.13008500  | H       | C | -1 | -2.89125300 | 6.20483700  | 0.17689500  | L      |
| H | 0  | -4.86017700  | -0.97337600 | 0.78941100  | H       | C | -1 | -4.54718600 | 10.70792300 | -5.40165400 | L      |
| H | -1 | -7.50550400  | 2.24429500  | -3.09282000 | L       | N | 0  | 1.20237300  | 5.54864500  | -3.91629900 | H      |
| H | -1 | -10.13587200 | 2.56630700  | -2.06458500 | L       | C | 0  | 1.32800900  | 4.29752500  | -3.16538500 | H      |
| H | -1 | -9.54358800  | 2.98822000  | -3.52129800 | L       | C | 0  | 1.76744200  | 3.16775900  | -4.16026500 | H      |
| H | 0  | -8.76958200  | -3.81993200 | -1.72724700 | H       | O | 0  | 1.42545200  | 1.87858900  | -3.69005200 | H      |
| H | 0  | -7.54399000  | -2.52222400 | -1.59327600 | H       | C | 0  | 3.26236600  | 3.15015100  | -4.46447000 | H      |
| H | -1 | -8.71712800  | -2.23763500 | -3.68702800 | L       | C | 0  | 2.21542700  | 4.31768500  | -1.90648000 | H      |
| H | -1 | -9.98586900  | -0.16746500 | -1.98068200 | L       | O | 0  | 2.18839000  | 3.39245900  | -1.09087700 | H      |
| H | -1 | -10.82228400 | -3.58564900 | -3.20291200 | L       | N | 0  | 3.02818100  | 5.40267200  | -1.76341000 | H      |
| H | 0  | -7.39523600  | -0.57593000 | 0.09106400  | H       | C | -1 | 4.03056200  | 5.53202800  | -0.64083400 | L H 88 |
| H | 0  | 6.65063300   | -3.17670000 | 6.56588200  | L       | C | -1 | 5.29097300  | 6.22991400  | -1.15494000 | L      |

G1c\_R786H

ONIOM: extrapolated energy = -3373.553118 au

|   |    |             |             |             |        |   |    |             |             |             |         |
|---|----|-------------|-------------|-------------|--------|---|----|-------------|-------------|-------------|---------|
| N | -1 | -4.16830500 | -7.59862700 | -0.79126500 | L      | C | -1 | 7.89864600  | 3.29249800  | -5.30958100 | L       |
| C | -1 | -2.87984200 | -6.94261600 | -0.80950200 | L      | C | -1 | 7.64689900  | 3.83025000  | -2.98607400 | L       |
| C | -1 | -3.03532500 | -5.51158200 | -0.22800600 | L H 4  | C | -1 | 6.99854300  | 4.54568400  | -1.97679800 | L       |
| C | 0  | -1.80972000 | -4.62054600 | -0.20679000 | H      | C | -1 | 3.33476100  | 6.32336000  | 0.46539300  | L       |
| C | 0  | -2.02414200 | -3.33543300 | 0.67442500  | H      | O | -1 | 3.56345400  | 7.53440300  | 0.63241100  | L       |
| O | 0  | -3.12366900 | -2.71856400 | 0.56710600  | H      | N | -1 | 2.49558800  | 5.62112300  | 1.22656400  | L       |
| O | 0  | -1.04539500 | -2.97771800 | 1.39339600  | H      | C | -1 | 1.48001900  | 6.25118900  | 2.10925200  | L H 312 |
| C | -1 | -1.89367800 | -7.72194300 | 0.06991400  | L      | C | 0  | 0.40175300  | 5.20471000  | 2.42627700  | H       |
| O | -1 | -0.70907500 | -7.89764200 | -0.31662800 | L      | C | 0  | 0.81615800  | 4.05100600  | 3.39673500  | H       |
| N | -1 | -2.54443300 | -5.99768600 | 6.20900400  | L      | O | 0  | 2.04046000  | 3.89001400  | 3.69577900  | H       |
| C | -1 | -3.37953400 | -4.92731100 | 5.70231000  | L      | O | 0  | -0.14188900 | 3.33983500  | 3.81056800  | H       |
| C | -1 | -2.54761100 | -3.89416700 | 4.91500900  | L      | C | -1 | 2.02104500  | 6.88002600  | 3.38119400  | L       |
| C | -1 | -1.18764700 | -3.53151700 | 5.48921000  | L      | O | -1 | 1.20568000  | 7.31994100  | 4.23279200  | L       |
| C | -1 | -1.02229900 | -3.22758700 | 6.83152200  | L      | N | -1 | 9.83359700  | 4.88951400  | 4.48385700  | L       |
| C | -1 | 0.22248300  | -2.86246900 | 7.33507400  | L      | C | -1 | 9.59782600  | 4.28025900  | 3.16277000  | L       |
| C | -1 | 1.30520600  | -2.76417300 | 6.47840700  | L      | C | -1 | 8.24870700  | 4.71049400  | 2.61059600  | L       |
| O | -1 | 2.54986700  | -2.40912300 | 6.93195000  | L      | C | -1 | 7.08200400  | 4.06942300  | 3.35628600  | L       |
| C | -1 | 1.15860600  | -3.05463000 | 5.13507500  | L      | C | -1 | 5.73758800  | 4.48305800  | 2.82813900  | L       |
| C | -1 | -0.08198300 | -3.42495400 | 4.65140000  | L      | O | -1 | 5.59830000  | 5.51773600  | 2.16258000  | L       |
| C | -1 | -4.41453200 | -5.58885300 | 4.80610200  | L      | N | -1 | 4.71665400  | 3.67376400  | 3.12280300  | L       |
| O | -1 | -4.19120300 | -5.71553400 | 3.57417400  | L      | C | -1 | 10.72854500 | 4.61698700  | 2.18582700  | L       |
| N | -1 | -6.98414600 | -5.91462500 | 2.77333100  | L      | O | -1 | 11.07046800 | 3.78308800  | 1.30760600  | L       |
| C | -1 | -7.75176000 | -5.18953800 | 1.76711000  | L      | N | -1 | 11.39264600 | -1.88748700 | -1.77434100 | L       |
| C | -1 | -7.15831400 | -3.80320200 | 1.53848300  | L      | C | -1 | 10.09777900 | -2.51078000 | -2.00471800 | L       |
| C | -1 | -6.96638400 | -3.03174100 | 2.81822900  | L      | C | -1 | 9.03341400  | -1.48879700 | -2.41391400 | L       |
| C | -1 | -8.03654800 | -2.88933900 | 3.70816700  | L      | C | -1 | 8.49412300  | -0.67136300 | -1.26624800 | L       |
| C | -1 | -7.88473200 | -2.21945800 | 4.89978600  | L      | C | -1 | 9.05027100  | -0.52881000 | -0.01708900 | L       |
| C | -1 | -6.65552000 | -1.69536400 | 5.21515000  | L      | N | -1 | 8.28078700  | 0.33138800  | 0.73992200  | L       |
| O | -1 | -6.55387900 | -1.02063700 | 6.40262100  | L      | C | -1 | 7.22355500  | 0.77253200  | -0.01307500 | L       |
| C | -1 | -5.57270500 | -1.81741800 | 4.37244700  | L      | C | -1 | 7.31907600  | 0.15477600  | -1.27946900 | L       |
| C | -1 | -5.72956200 | -2.48958300 | 3.16510000  | L      | C | -1 | 6.34693000  | 0.42705600  | -2.24009900 | L       |
| C | -1 | -7.69152700 | -5.94032700 | 0.44164600  | L      | C | -1 | 5.30184300  | 1.26999500  | -1.92167200 | L       |
| O | -1 | -6.58701200 | -6.35281800 | 0.00179400  | L      | C | -1 | 5.21172200  | 1.86240700  | -0.63028000 | L       |
| N | -1 | -6.10851000 | -3.95754400 | -3.68452900 | L      | C | -1 | 6.17412100  | 1.62756800  | 0.32050700  | L       |
| C | -1 | -5.61503900 | -2.60714100 | -3.52645800 | L      | C | -1 | 10.30634600 | -3.56560700 | -3.07324500 | L       |
| C | -1 | -4.58194200 | -2.54478500 | -2.42665700 | L      | O | -1 | 10.78092000 | -3.24184200 | -4.19285500 | L       |
| O | -1 | -5.19152200 | -3.00901000 | -1.21406100 | L      | N | -1 | 6.35690400  | -6.90670300 | 1.39495500  | L       |
| C | -1 | -4.06290600 | -1.12484500 | -2.23499900 | L      | C | -1 | 6.42847800  | -5.59630700 | 0.74412700  | L       |
| C | -1 | -5.01283300 | -2.10079600 | -4.84867900 | L      | C | -1 | 5.53452800  | -4.58919600 | 1.48203500  | L H 327 |
| O | -1 | -4.00676600 | -2.67355900 | -5.34197500 | L      | C | 0  | 5.77212100  | -3.12973200 | 1.12563200  | H       |
| N | -1 | -3.43431800 | 0.60407400  | -6.05075500 | L      | C | 0  | 5.03250000  | -2.74637200 | -0.15196100 | H       |
| C | -1 | -2.08975600 | 1.20747200  | -6.22960200 | L H 43 | O | 0  | 5.30339300  | -3.22681400 | -1.24102000 | H       |

|   |    |             |              |             |   |   |    |              |              |             |   |
|---|----|-------------|--------------|-------------|---|---|----|--------------|--------------|-------------|---|
| O | 0  | 4.05729300  | -1.85683600  | -0.02792400 | H | H | -1 | -7.92397300  | 0.749999400  | 4.87446500  | L |
| C | -1 | 7.87770300  | -5.06890800  | 0.74014100  | L | H | -1 | -10.28884300 | 0.82375100   | 4.25143400  | L |
| O | -1 | 8.42041900  | -4.72852400  | -0.34299000 | L | H | -1 | -9.83479700  | 0.88800100   | 2.67899300  | L |
| N | -1 | 2.91554500  | -10.61731400 | 0.53095800  | L | H | -1 | -5.59756300  | 8.26551100   | -4.04783000 | L |
| C | -1 | 2.49017900  | -9.36135700  | -0.08935600 | L | H | -1 | -3.88925300  | 8.36079700   | -4.49493200 | L |
| C | -1 | 3.51823200  | -8.25806800  | 0.23800600  | L | H | -1 | -4.77942800  | 10.16637400  | -1.18668400 | L |
| C | -1 | 2.90579600  | -6.87344900  | 0.20523400  | L | H | -1 | -4.06144700  | 8.73915600   | 0.76155900  | L |
| C | -1 | 2.11295600  | -6.40084500  | 1.26388300  | L | H | -1 | -3.43443700  | 5.85442700   | -3.70993800 | L |
| C | -1 | 1.50829500  | -5.16944500  | 1.20594600  | L | H | -1 | -2.41061500  | 4.01178900   | -2.37568800 | L |
| C | -1 | 1.68375200  | -4.38173500  | 0.09621900  | L | H | -1 | -2.75512800  | 6.27197100   | 1.26646300  | L |
| O | -1 | 1.08686200  | -3.16227000  | 0.02533600  | L | H | -1 | -2.09820600  | 4.21369800   | 0.05261800  | L |
| C | -1 | 2.45453900  | -4.82557800  | -0.96505300 | L | H | -1 | -3.91776500  | 10.76335800  | -3.36249500 | L |
| C | -1 | 3.07283300  | -6.05967900  | -0.88555800 | L | H | -1 | -6.78267100  | 10.34596600  | -3.81443600 | L |
| C | -1 | 2.28196900  | -9.50734800  | -1.60079600 | L | H | -1 | -6.05610500  | 11.78106200  | -3.55379800 | L |
| O | -1 | 3.04337900  | -10.25131900 | -2.27186400 | L | H | 0  | 1.21479900   | 3.40551100   | -5.08157200 | H |
| N | -1 | 2.52817100  | -7.14666700  | -4.15334100 | L | H | 0  | 3.46793800   | 2.45764000   | -5.28797500 | H |
| C | -1 | 3.34109700  | -6.35348100  | -5.06216100 | L | H | 0  | 3.82169600   | 2.80065200   | -3.58367000 | H |
| C | -1 | 3.89179500  | -5.09376000  | -4.36112000 | L | H | 0  | 3.64761700   | 4.13870200   | -4.75382000 | H |
| C | -1 | 3.89815500  | -3.89398000  | -5.27737700 | L | H | 0  | 0.43639900   | 1.84916000   | -3.48202600 | H |
| C | 0  | 4.68350900  | -2.69957300  | -4.74797100 | H | H | 0  | 0.32563000   | 4.01745300   | -2.82298800 | H |
| N | 0  | 4.07881100  | -2.09413100  | -3.57028600 | H | H | 0  | 0.83552700   | 6.30441400   | -3.34415800 | H |
| C | 0  | 3.19684200  | -1.07966600  | -3.53519000 | H | H | 0  | 2.07707300   | 5.84549200   | -4.34389100 | H |
| N | 0  | 2.75269900  | -0.47878000  | -4.65335300 | H | H | -1 | 5.99130700   | 6.36463800   | -0.30583500 | L |
| N | 0  | 2.81750600  | -0.62582200  | -2.34506700 | H | H | -1 | 5.06350900   | 7.25331000   | -1.51799900 | L |
| C | -1 | 4.46448900  | -7.09655100  | -5.79506900 | L | H | -1 | 4.81359100   | 6.30252500   | -3.85104500 | L |
| O | -1 | 4.67131700  | -6.87744500  | -7.01683200 | L | H | -1 | 7.29759400   | 4.38424600   | -0.93190600 | L |
| C | 0  | -0.60891200 | -0.08957600  | 2.88827800  | H | H | -1 | 5.95043600   | 5.04085200   | -5.65996300 | L |
| O | 0  | -0.86542900 | 0.46832700   | 4.14630900  | H | H | -1 | 8.43986800   | 3.12362200   | -2.70730100 | L |
| C | 0  | -1.54377500 | 0.48900700   | 1.79231600  | H | H | -1 | 8.55244400   | 2.74300800   | -4.89605800 | L |
| O | 0  | -2.79560900 | -0.16876400  | 1.81622100  | H | H | -1 | 4.30538200   | 4.48582700   | -0.31311500 | L |
| O | 0  | 0.78471900  | 0.19511500   | 2.66229100  | H | H | 0  | 2.97952200   | 6.14745800   | -2.45267600 | H |
| C | 0  | 1.32904200  | 0.12877100   | 1.35880700  | H | H | 0  | -0.48968700  | 5.69291700   | 2.86696800  | H |
| C | 0  | 0.50969000  | 1.01042800   | 0.40635400  | H | H | 0  | 0.02068800   | 4.72859400   | 1.49721000  | H |
| O | 0  | 1.04438300  | 0.96360800   | -0.91704100 | H | H | -1 | 1.03652100   | 7.09810100   | 1.52256700  | L |
| C | 0  | -0.94330100 | 0.54307500   | 0.37898800  | H | H | -1 | 2.83180700   | 4.72604700   | 1.54981300  | L |
| O | 0  | -1.73045800 | 1.46883100   | -0.36683200 | H | H | -1 | 8.18588200   | 4.43608200   | 1.53522200  | L |
| C | 0  | 2.77132400  | 0.61079500   | 1.48466400  | H | H | -1 | 8.14357000   | 5.81635300   | 2.63047900  | L |
| O | 0  | 3.67111000  | -0.37758400  | 2.02979300  | H | H | -1 | 7.20052100   | 2.96314200   | 3.32107800  | L |
| H | -1 | -3.44254400 | -5.59231900  | 0.80516500  | L | H | -1 | 7.13754400   | 4.34018500   | 4.43156400  | L |
| H | -1 | -3.82538000 | -4.99262100  | -0.81558000 | L | H | -1 | 4.85445000   | 3.00498300   | 3.84348100  | L |
| H | 0  | -0.91405600 | -5.15092000  | 0.17447000  | L | H | -1 | 3.73388100   | 3.89949600   | 2.93152900  | L |
| H | 0  | -1.55655100 | -4.25148800  | -1.23252100 | H | H | -1 | 9.58847200   | 3.17278400   | 3.33162600  | L |
| H | -1 | -2.51434200 | -6.89467000  | -1.86421900 | L | H | -1 | 10.74576200  | 4.64687700   | 4.80902000  | L |
| H | -1 | -4.54104600 | -7.62593500  | 0.13550800  | L | H | -1 | 9.75426000   | 5.88415200   | 4.43075100  | L |
| H | -1 | -4.80000300 | -7.14416200  | -1.41589800 | L | H | -1 | 8.17747600   | -2.02434700  | -2.87441400 | L |
| H | -1 | -2.38816000 | -4.23767500  | 3.87087600  | L | H | -1 | 9.41571200   | -0.79702800  | -3.19261000 | L |
| H | -1 | -3.14570800 | -2.95868800  | 4.83065800  | L | H | -1 | 9.98624300   | -0.95916900  | 0.34892200  | L |
| H | -1 | -1.88060300 | -3.27993600  | 7.51219500  | L | H | -1 | 8.28959000   | 0.34439900   | 1.72838300  | L |
| H | -1 | -0.18220800 | -3.64072000  | 3.57854600  | L | H | -1 | 6.42197400   | -0.03491700  | -3.23061200 | L |
| H | -1 | 0.31991400  | -2.63288700  | 8.40336100  | L | H | -1 | 4.53995700   | 1.53956700   | -2.67004200 | L |
| H | -1 | 2.00470300  | -2.98097900  | 4.44096700  | L | H | -1 | 6.11759200   | 2.09510400   | 1.31106400  | L |
| H | -1 | 2.47728400  | -2.25049100  | 7.86567000  | L | H | -1 | 4.37101200   | 2.54333700   | -0.41612200 | L |
| H | -1 | -3.87830200 | -4.43136700  | 6.57080200  | L | H | -1 | 9.78937100   | -2.99729200  | -1.04608000 | L |
| H | -1 | -3.10292900 | -6.69941600  | 6.64891500  | L | H | -1 | 12.08181600  | -2.58835400  | -1.59408000 | L |
| H | -1 | -2.00332500 | -6.40605300  | 5.47556700  | L | H | -1 | 11.67369500  | -1.34099800  | -2.56306800 | L |
| H | -1 | -6.18738100 | -3.87922300  | 1.00236100  | L | H | -1 | 5.71854400   | -4.66152400  | 2.57430300  | L |
| H | -1 | -7.81927900 | -3.20605800  | 0.87010500  | L | H | -1 | 4.46912500   | -4.85947100  | 1.31850600  | L |
| H | -1 | -9.02547800 | -3.27483000  | 3.42533900  | L | H | 0  | 5.45083600   | -2.47920600  | 1.95593300  | H |
| H | -1 | -4.87458000 | -2.57475300  | 2.48401200  | L | H | 0  | 6.84507100   | -2.92246400  | 0.94952700  | H |
| H | -1 | -8.75406800 | -2.08381700  | 5.55784200  | L | H | -1 | 6.06323100   | -5.73005700  | -0.30664700 | L |
| H | -1 | -4.60118800 | -1.37401900  | 4.63554700  | L | H | -1 | 5.66585700   | -6.91900000  | 2.11851200  | L |
| H | -1 | -7.43140600 | -0.92452700  | 6.75416300  | L | H | -1 | 7.23990900   | -7.15633500  | 1.79237700  | L |
| H | -1 | -8.81038800 | -5.12295200  | 2.12000700  | L | H | -1 | 3.94478700   | -8.41146500  | 1.25207500  | L |
| H | -1 | -6.99922500 | -5.39839400  | 3.63115600  | L | H | -1 | 4.37745100   | -8.30288700  | -0.46065700 | L |
| H | -1 | -6.03571800 | -6.03540100  | 2.47404000  | L | H | -1 | 1.96617400   | -7.04288500  | 2.14018600  | L |
| H | -1 | -3.71449100 | -3.22414800  | -2.65676400 | L | H | -1 | 3.66108400   | -6.00189900  | -1.83593800 | L |
| H | -1 | -3.33748700 | -1.05215800  | -1.41094700 | L | H | -1 | 0.90357000   | -4.82464900  | 2.05893300  | L |
| H | -1 | -4.88440600 | -0.42238100  | -2.03880800 | L | H | -1 | 2.63171900   | -4.20030100  | -1.85724800 | L |
| H | -1 | -3.55291100 | -0.76314200  | -3.14248100 | L | H | -1 | 0.61963000   | -2.99448500  | 0.84522900  | L |
| H | -1 | -4.49395400 | -3.01422100  | -0.56383500 | L | H | -1 | 1.50306800   | -9.09678600  | 0.36783400  | L |
| H | -1 | -6.46916000 | -1.91107500  | -3.27166400 | L | H | -1 | 3.08715600   | -10.46762800 | 1.50434100  | L |
| H | -1 | -5.57113800 | -4.62639700  | -3.17149800 | L | H | -1 | 3.74873400   | -10.96099900 | 0.09994900  | L |
| H | -1 | -7.05871400 | -4.00046300  | -3.38173100 | L | H | -1 | 4.91734000   | -5.29505800  | -3.98350300 | L |
| H | 0  | -0.72255500 | 2.66845600   | -5.38856400 | H | H | -1 | 3.30008900   | -4.84913100  | -3.43593700 | L |
| H | 0  | -2.40556400 | 3.23588000   | -5.54063000 | H | H | -1 | 4.33711600   | -4.16883000  | -6.25992200 | L |
| H | -1 | -2.01230400 | 1.62394100   | -7.26513100 | L | H | -1 | 2.85354000   | -3.58514700  | -5.50844300 | H |
| H | -1 | -3.80981700 | 0.88359200   | -5.14884900 | L | H | 0  | 5.70591400   | -3.00408100  | -4.45882400 | H |
| H | -1 | -4.03602300 | 0.92411300   | -6.77805700 | L | H | 0  | 4.79604600   | -1.92789300  | -5.53302900 | H |
| H | -1 | -1.90000600 | -3.28508000  | -4.07669500 | L | H | 0  | 4.35065400   | -2.50989000  | -2.67359600 | H |
| H | -1 | -0.18317600 | -4.80014000  | -3.06052100 | L | H | 0  | 3.21003200   | -1.04127400  | -1.50389300 | H |
| H | -1 | 1.09427600  | -4.04685200  | -4.02818100 | L | H | 0  | 2.03552500   | 0.01507000   | -2.19230000 | H |
| H | -1 | -0.20054500 | -4.96538900  | -4.82145200 | L | H | 0  | 2.73509000   | -0.97859800  | -5.53015300 | H |
| H | -1 | -0.77089300 | -2.69182000  | -1.94575800 | L | H | 0  | 2.13191200   | 0.33394900   | -4.53229200 | H |
| H | -1 | 0.53768700  | -1.85120700  | -2.80228400 | L | H | -1 | 2.63293000   | -5.91051000  | -5.82908800 | L |
| H | -1 | -1.11349600 | -1.19903700  | -2.83538500 | L | H | -1 | 2.83894300   | -6.96177500  | -3.21851000 | L |
| H | -1 | 0.56562700  | -1.88502300  | -5.35140900 | L | H | -1 | 1.54093400   | -6.37240400  | -4.52426900 | L |
| H | -1 | -2.15719900 | -1.01136800  | -4.88337800 | L | H | 0  | -0.76129700  | -1.17076500  | 2.95731100  | H |
| H | 0  | -7.01154800 | 0.42992100   | 2.62564100  | H | H | 0  | -0.58674800  | 1.41119600   | 4.08997500  | H |
| H | 0  | -7.80697100 | 1.86549000   | 2.00093100  | H | H | 0  | -1.74257000  | 1.53112300   | 2.07072000  | H |
| H | 0  | -4.88065100 | 0.61411700   | 3.89156600  | H | H | 0  | -2.71319100  | -1.09657800  | 1.46956000  | H |
| H | 0  | -6.93826100 | 4.16800500   | 2.62013200  | H | H | 0  | 1.31689800   | -0.90665200  | 0.98032400  | H |
| H | 0  | -2.85904400 | 1.91599100   | 4.30470100  | H | H | 0  | 0.53630300   | 2.04402400   | 0.77347800  | H |
| H | 0  | -4.87231900 | 5.48919800   | 3.01969600  | H | H | 0  | 1.36325800   | 1.86111600   | -1.14965000 | H |
| H | 0  | -1.79655500 | 4.03436100   | 3.91874900  | H | H | 0  | -0.97919300  | -0.45822900  | -0.07832000 | H |

|                                              |    |              |             |             |         |   |    |             |             |             |        |
|----------------------------------------------|----|--------------|-------------|-------------|---------|---|----|-------------|-------------|-------------|--------|
| H                                            | 0  | -1.46694600  | 1.49398100  | -1.32883900 | H       | O | -1 | -3.21661000 | -6.67661500 | 2.42179200  | L      |
| H                                            | 0  | 2.79835900   | 1.51597400  | 2.10179500  | H       | N | -1 | -5.96183200 | -7.17453200 | 1.58672000  | L      |
| H                                            | 0  | 3.16288000   | 0.85518600  | 0.49103900  | H       | C | -1 | -6.86680800 | -6.40294700 | 0.74224400  | L      |
| H                                            | 0  | 3.94254500   | -1.44473600 | 0.89283000  | H       | C | -1 | -6.51475800 | -4.91988500 | 0.79670200  | L      |
| O                                            | -1 | -5.54776600  | 10.89622700 | -6.14121900 | L       | C | -1 | -6.41389600 | -4.39488600 | 2.20522600  | L      |
| H                                            | -1 | -8.17034200  | 3.10828600  | 5.47452600  | L       | C | -1 | -7.46632600 | -4.61027700 | 3.10161700  | L      |
| H                                            | -1 | -8.61173000  | -6.09811900 | -0.13464100 | L       | C | -1 | -7.39101800 | -4.17271300 | 4.40338800  | L      |
| H                                            | -1 | -2.22524100  | -8.11607900 | 1.04027100  | L       | C | -1 | -6.25519300 | -3.52452400 | 4.82153200  | L      |
| H                                            | -1 | 1.47093800   | -8.94241800 | -2.07817600 | L       | O | -1 | -6.23027800 | -3.08978400 | 6.12001400  | L      |
| H                                            | -1 | 10.04727300  | -4.61284500 | -2.86721400 | L       | C | -1 | -5.19222200 | -3.29668200 | 3.97553200  | L      |
| H                                            | -1 | 11.23314400  | 5.59099900  | 2.25203400  | L       | C | -1 | -5.27259100 | -3.73419200 | 2.65787300  | L      |
| H                                            | -1 | -3.53181600  | 10.83127000 | -5.79940800 | L       | C | -1 | -6.72372500 | -6.85712200 | -0.70600300 | L      |
| H                                            | -1 | 3.10320100   | 6.95750900  | 3.54935600  | L       | O | -1 | -5.58007500 | -6.98572000 | -1.21502300 | L      |
| H                                            | -1 | -5.47511300  | -1.24019500 | -5.35019400 | L       | N | -1 | -5.60778800 | -3.86528500 | -4.34829500 | L      |
| H                                            | -1 | -5.33858100  | -5.99093300 | 5.24609400  | L       | C | -1 | -5.33709300 | -2.50975600 | -3.92243700 | L      |
| H                                            | -1 | -1.70064100  | -3.36447700 | -6.96154700 | L       | C | -1 | -4.29619200 | -2.49487900 | -2.82834300 | L      |
| H                                            | -1 | 5.07453500   | -7.82546800 | -5.24615600 | L       | O | -1 | -4.78578400 | -3.28360500 | -1.73497200 | L      |
| H                                            | -1 | 8.43082800   | -4.99038100 | 1.68667900  | L       | C | -1 | -4.01065700 | -1.07454300 | -2.35562000 | L      |
| N                                            | -1 | -9.34845600  | 2.92496500  | -3.26244200 | L       | C | -1 | -4.86480200 | -1.65995500 | -5.11494800 | L      |
| C                                            | -1 | -8.09099400  | 2.26563400  | -2.83764600 | L H 345 | O | -1 | -3.79362700 | -1.94921500 | -5.70865000 | L      |
| C                                            | 0  | -7.75322700  | 2.65414900  | -1.38712900 | H       | N | -1 | -3.78532400 | 1.45245300  | -5.74793500 | L      |
| C                                            | 0  | -6.49359100  | 2.02277200  | -0.87092200 | H       | C | -1 | -2.56322200 | 2.29382200  | -5.79784700 | H 43   |
| N                                            | 0  | -6.53652100  | 0.85013600  | -0.13621200 | H       | C | 0  | -2.40135300 | 3.24963600  | -4.61128000 | H      |
| C                                            | 0  | -5.29878800  | 0.53493900  | 0.24202400  | H       | C | 0  | -2.63270000 | 2.53341200  | -3.24746800 | H      |
| N                                            | 0  | -4.46027500  | 1.46252300  | -0.23086600 | H       | O | 0  | -3.78799100 | 2.12163800  | -3.03926200 | H      |
| C                                            | 0  | -5.17766100  | 2.39469000  | -0.93939500 | H       | O | 0  | -1.62479200 | 2.42921100  | -2.45799500 | H      |
| C                                            | -1 | -8.25840900  | 0.72623600  | -2.97034700 | L       | C | -1 | -1.31485100 | 1.38274800  | -5.89967100 | L      |
| O                                            | -1 | -7.32493400  | 0.04600800  | -3.39436100 | L       | O | -1 | -0.26119800 | 1.86551500  | -6.34468400 | L      |
| N                                            | -1 | -9.39507800  | 0.20894700  | -2.51238700 | L       | N | -1 | -1.46046700 | 0.11491700  | -5.51867300 | L      |
| C                                            | -1 | -9.62706300  | -1.21850500 | -2.43774700 | L H 355 | C | -1 | -0.41904800 | -0.91581300 | -5.64995300 | L      |
| C                                            | 0  | -9.03101300  | -1.85432500 | -1.16520700 | H       | C | -1 | -0.55689700 | -1.98253500 | -4.53055300 | L      |
| C                                            | 0  | -9.52232000  | -1.13313700 | 0.14391700  | H       | C | -1 | 0.47079300  | -3.08326800 | -4.69629700 | L      |
| O                                            | 0  | -10.47513600 | -1.63745400 | 0.74287400  | H       | C | -1 | -0.37382400 | -1.39072100 | -3.15972200 | L      |
| O                                            | 0  | -8.89388900  | -0.05252600 | 0.44975500  | H       | C | -1 | -0.47677200 | -1.63342900 | -7.00875200 | L      |
| C                                            | -1 | -11.10297800 | -1.57078200 | -2.50851800 | L       | O | -1 | 0.58716900  | -1.89595100 | -7.62736600 | L      |
| O                                            | -1 | -11.97023100 | -0.66026600 | -2.45947800 | L       | N | -1 | -9.53813500 | -1.42861200 | 3.69830800  | L      |
| H                                            | 0  | -8.57837800  | 2.35969700  | -0.70843000 | H       | C | -1 | -8.46186200 | -0.63440200 | 4.25648000  | H 58   |
| H                                            | 0  | -7.64516700  | 3.75479400  | -1.31575900 | H       | C | 0  | -7.48902500 | -0.13403800 | 3.18454800  | H      |
| H                                            | 0  | -4.68332500  | 3.21124500  | -1.44881700 | H       | C | 0  | -6.38993500 | 0.79083600  | 3.70208700  | H      |
| H                                            | 0  | -3.41981800  | 1.41034600  | -0.17734500 | H       | C | 0  | -5.11810100 | 0.30506900  | 4.03088900  | H      |
| H                                            | 0  | -4.99295400  | -0.32365200 | 0.81757500  | H       | C | 0  | -4.07367900 | 1.14951200  | 4.40970500  | H      |
| H                                            | -1 | -7.24599500  | 2.56781900  | -3.50804100 | L       | C | 0  | -4.27053700 | 2.53735400  | 4.45168400  | H      |
| H                                            | -1 | -9.76045000  | 3.45206900  | -2.52042100 | L       | O | 0  | -3.29623700 | 3.42311500  | 4.77533700  | H      |
| H                                            | -1 | -9.16707300  | 3.52851300  | -4.03464700 | L       | C | 0  | -5.54514500 | 3.04219700  | 4.14419200  | H      |
| H                                            | 0  | -9.33442000  | -2.91737700 | -1.10639100 | H       | C | 0  | -6.57524800 | 2.18265400  | 3.77190600  | H      |
| H                                            | 0  | -7.92223100  | -1.82473600 | -1.22414600 | H       | C | -1 | -8.97945600 | 0.56748700  | 5.05901000  | L      |
| H                                            | -1 | -9.12447400  | -1.71476700 | -3.30927000 | L       | O | -1 | -9.90708400 | 1.28075700  | 4.59605800  | L      |
| H                                            | -1 | -10.01091200 | 0.78055200  | -1.96967900 | L       | N | -1 | -7.90072100 | 10.35195700 | -1.12019200 | L      |
| H                                            | -1 | -11.38548000 | -2.62819800 | -2.57664300 | L       | C | -1 | -6.59283300 | 10.17045200 | -1.76611600 | L      |
| H                                            | 0  | -7.46893300  | 0.33545300  | 0.09331500  | H       | C | -1 | -6.24226000 | 8.69134100  | -1.90771700 | L      |
| N                                            | 0  | 6.99199600   | 2.85615600  | 6.76865900  | L       | C | -1 | -5.75084400 | 8.11188700  | -0.62508300 | L      |
| C                                            | 0  | 5.78334000   | 3.21069100  | 7.54656800  | L H 383 | C | -1 | -5.96365500 | 8.61442100  | 0.64838400  | L      |
| C                                            | 0  | 5.54305400   | 2.27050000  | 8.71978200  | L       | N | -1 | -5.34619900 | 7.83853600  | 1.57628100  | L      |
| O                                            | 0  | 6.30525100   | 1.40838900  | 9.08643700  | L       | C | -1 | -4.72878600 | 6.78299000  | 0.94071700  | L      |
| H                                            | 0  | 6.00494500   | 4.21101800  | 7.99955000  | L       | C | -1 | -4.97235900 | 6.91727000  | -0.44733500 | L      |
| H                                            | 0  | 7.04708500   | 3.44953800  | 5.95890700  | L       | C | -1 | -4.41825300 | 5.97108200  | -1.32906600 | L      |
| H                                            | 0  | 6.92480700   | 1.90062600  | 6.46687200  | L       | C | -1 | -3.67391100 | 4.93563300  | -0.79234200 | L      |
| H                                            | 0  | 4.59415000   | 2.43070000  | 9.26068400  | L       | C | -1 | -3.47244900 | 4.80562100  | 0.58497300  | L      |
| C                                            | 0  | 4.50162700   | 3.34442800  | 6.71160200  | H       | C | -1 | -3.98162500 | 5.72664600  | 1.47285500  | L      |
| H                                            | 0  | 3.66896500   | 3.65633800  | 7.37399700  | H       | C | -1 | -6.51407300 | 10.90257000 | -3.10280000 | L      |
| H                                            | 0  | 4.61241200   | 4.17696100  | 5.98290500  | L       | N | 0  | 0.00863100  | 6.53204400  | -2.62253600 | H      |
| C                                            | 0  | 4.09022400   | 2.08119500  | 5.99273400  | H       | C | 0  | 0.36370800  | 5.20514400  | -2.11496200 | H      |
| N                                            | 0  | 2.78764900   | 1.92484100  | 5.54375800  | H       | C | 0  | 0.95360600  | 4.36035700  | -3.29672100 | H      |
| C                                            | 0  | 4.72623800   | 0.90491600  | 5.65506100  | H       | O | 0  | 0.85721100  | 2.97563500  | -3.05233000 | H      |
| C                                            | 0  | 2.71321800   | 0.70611100  | 4.95093200  | H       | C | 0  | 2.41453300  | 4.66669100  | -3.61303300 | H      |
| N                                            | 0  | 3.86196100   | 0.04954400  | 4.99744200  | H       | C | 0  | 1.27948300  | 5.14888600  | -0.87972400 | H      |
| H                                            | 0  | 5.75139900   | 0.61700000  | 5.88545800  | H       | O | 0  | 1.42168200  | 4.10878600  | -0.23445600 | H      |
| H                                            | 0  | 1.80620000   | 0.35520200  | 4.47808100  | H       | N | 0  | 1.93068600  | 6.30611300  | -0.56234700 | H      |
| H                                            | 0  | 3.63454300   | -0.40568800 | 3.01279800  | H       | C | -1 | 2.93001900  | 6.38620100  | 0.56382300  | L H 88 |
| H                                            | 0  | 2.20506200   | 2.70290600  | 5.18821800  | H       | C | -1 | 4.04389400  | 7.37100900  | 0.20385800  | L      |
| Glc_R786K                                    |    |              |             |             |         |   |    |             |             |             |        |
| ONIOM: extrapolated energy = -3243.304787 au |    |              |             |             |         |   |    |             |             |             |        |
| N                                            | -1 | -3.01472300  | -7.63182800 | -2.23121100 | L       | O | -1 | 6.25987400  | 6.16396800  | -3.31029600 | L      |
| C                                            | -1 | -1.85182300  | -6.78058600 | -2.11346600 | L       | O | -1 | 6.97311600  | 5.78439000  | -4.44283100 | L      |
| C                                            | -1 | -2.22180300  | -5.53829700 | -1.25908500 | L H 4   | C | -1 | 6.70530200  | 5.80421200  | -2.05973900 | L      |
| C                                            | 0  | -1.15946900  | -4.47874500 | -1.05013400 | H       | C | -1 | 5.97873700  | 6.18896900  | -0.93061900 | L      |
| C                                            | 0  | -1.55986300  | -3.46792900 | 0.08690700  | H       | C | -1 | 2.14715800  | 6.81733200  | 1.80285900  | L      |
| O                                            | 0  | -2.75239400  | -3.04877500 | 0.11092200  | H       | O | -1 | 2.17977900  | 7.99250600  | 2.20871400  | L      |
| O                                            | 0  | -0.63008100  | -3.10858900 | 0.87055200  | H       | N | -1 | 1.45669600  | 5.84952200  | 2.40564100  | L      |
| C                                            | -1 | -0.72619300  | -7.54332400 | -1.40323000 | L       | C | -1 | 0.37823500  | 6.11582300  | 3.39232700  | H 102  |
| O                                            | -1 | 0.45932200   | -7.44034500 | -1.81252000 | L       | O | 0  | -0.51792400 | 4.87116400  | 3.48633700  | H      |
| N                                            | -1 | -1.46916200  | -7.19537800 | 4.95380700  | L       | C | 0  | 0.12547900  | 3.55546300  | 4.05664400  | H      |
| C                                            | -1 | -2.48240900  | -6.19982500 | 4.66738400  | L       | O | 0  | 1.37371200  | 3.44808800  | 4.15486200  | H      |
| C                                            | -1 | -1.85391500  | -4.90833700 | 4.10490400  | L       | O | 0  | -0.73116200 | 2.65844000  | 4.33749600  | H      |
| C                                            | -1 | -0.55517600  | -4.44546600 | 4.74502000  | L       | C | -1 | 0.84642300  | 6.56247400  | 4.76609500  | L      |
| C                                            | -1 | -0.40231900  | -4.38895900 | 6.12159400  | L       | O | -1 | -0.00446700 | 6.68438400  | 5.68516600  | L      |
| C                                            | -1 | 0.78035900   | -3.92889300 | 6.69253200  | L       | N | -1 | 8.90816600  | 5.71807900  | 5.47972600  | L      |
| C                                            | -1 | 1.80683600   | -3.48540500 | 5.87675400  | L       | C | -1 | 8.73636000  | 5.35068300  | 4.06284500  | L      |
| O                                            | -1 | 2.98956600   | -3.02521700 | 6.39668400  | L       | C | -1 | 7.31944900  | 5.65138800  | 3.60234400  | L      |
| C                                            | -1 | 1.67023500   | -3.52558100 | 4.50193800  | L       | C | -1 | 6.29555400  | 4.69139100  | 4.20089800  | L      |
| C                                            | -1 | 0.49311200   | -3.99392100 | 3.94945800  | L       | C | -1 | 4.88669800  | 4.97210100  | 3.76065400  | L      |
| C                                            | -1 | -3.42133100  | -6.83410000 | 3.65339900  | L       | O | -1 | 4.56077600  | 6.07992900  | 3.31408500  | L      |
|                                              |    |              |             |             |         | N | -1 | 4.02077100  | 3.96269000  | 3.88430500  | L      |

|   |    |             |             |             |   |   |    |              |             |             |   |
|---|----|-------------|-------------|-------------|---|---|----|--------------|-------------|-------------|---|
| C | -1 | 9.76768800  | 6.05622600  | 3.17689600  | L | H | -1 | -5.01562500  | -7.07487100 | 1.27297400  | L |
| O | -1 | 10.21527100 | 5.48032600  | 2.15143100  | L | H | -1 | -3.33656200  | -2.96202100 | -3.18590500 | L |
| N | -1 | 11.36866100 | 0.66216600  | -1.99738200 | L | H | -1 | -3.28295600  | -1.04638300 | -1.53085600 | L |
| C | -1 | 10.18679200 | -0.10951800 | -2.35226000 | L | H | -1 | -4.92974100  | -0.57077300 | -2.02651700 | L |
| C | -1 | 8.95823000  | 0.78201900  | -2.55365400 | L | H | -1 | -3.59348300  | -0.46155300 | -3.17088400 | L |
| C | -1 | 8.32662200  | 1.25615000  | -1.26818100 | L | H | -1 | -4.07810500  | -3.30106400 | -1.09598300 | L |
| C | -1 | 8.88848000  | 1.23993600  | -0.01356100 | L | H | -1 | -6.28557900  | -2.02913200 | -3.53730500 | L |
| N | -1 | 8.01140600  | 1.79419700  | 0.89674100  | L | H | -1 | -4.95354000  | -4.52352200 | -3.97678700 | L |
| C | -1 | 6.87465100  | 2.19345800  | 0.24272900  | L | H | -1 | -6.52890600  | -4.12410000 | -4.06373600 | L |
| C | -1 | 7.03253900  | 1.86203700  | -1.12099000 | L | H | 0  | -1.40852800  | 3.73105800  | -4.65398700 | H |
| C | -1 | 6.00117000  | 2.15317800  | -2.01179200 | L | H | 0  | -3.16051400  | 4.05139700  | -4.67881600 | H |
| C | -1 | 4.84224800  | 2.73149600  | -1.53576300 | L | H | -1 | -2.58530500  | 2.91320200  | -6.72932300 | L |
| C | -1 | 4.69455900  | 3.03439200  | -0.15257800 | L | H | -1 | -4.17476800  | 1.48244700  | -4.80985400 | L |
| C | -1 | 5.70991000  | 2.77974800  | 0.73600200  | L | H | -1 | -4.45233300  | 1.80521300  | -6.39916500 | L |
| C | -1 | 10.53336500 | -0.88350000 | -3.60874100 | L | H | -1 | -1.57901500  | -2.43994100 | -4.58259100 | L |
| O | -1 | 10.91557100 | -0.27122900 | -4.63957400 | L | H | -1 | 0.39134100   | -3.81929600 | -3.88216300 | L |
| N | -1 | 7.31574300  | -5.64784900 | 0.08905700  | L | H | -1 | 1.49959700   | -2.68874200 | -4.67545200 | L |
| C | -1 | 7.15315700  | -4.24153200 | -0.28733000 | L | H | -1 | 0.34945700   | -3.63473700 | -5.64076100 | L |
| C | -1 | 6.12876100  | -3.56219700 | 0.63304700  | L | H | -1 | -0.49984500  | -2.09941200 | -2.37189500 | L |
| C | 0  | 6.14484300  | -2.04435300 | 0.58227800  | H | H | -1 | 0.62810900   | -0.90122300 | -3.03876100 | L |
| C | 0  | 5.22632900  | -1.48024800 | -0.52145300 | H | H | -1 | -1.10767500  | -0.53851300 | -2.94752700 | L |
| O | 0  | 5.51799000  | -1.73954300 | -1.70713100 | H | H | -1 | 0.58627500   | -0.42678500 | -5.54338100 | L |
| O | 0  | 4.24456600  | -0.77956400 | -0.11447200 | H | H | -1 | -2.22774100  | -0.12665800 | -4.92101200 | L |
| C | -1 | 8.49601600  | -3.49069400 | -0.18064000 | L | H | 0  | -7.03557100  | -1.01439100 | 2.69961400  | H |
| O | -1 | 8.94377800  | -2.85825100 | -1.17215200 | L | H | 0  | -8.05723200  | 0.37436900  | 2.38677200  | H |
| N | -1 | 9.60824100  | -4.99529000 | 5.29709500  | L | H | 0  | -4.91204600  | -0.76303800 | 3.95896000  | H |
| C | -1 | 8.19457800  | -4.81049600 | 5.62316100  | L | H | 0  | -7.54530100  | 2.60391600  | 3.50567600  | H |
| C | -1 | 7.85570100  | -3.33622100 | 5.77152200  | L | H | 0  | -3.09938200  | 0.72490700  | 4.62886900  | H |
| C | -1 | 6.42191800  | -3.12808900 | 6.24310000  | L | H | 0  | -5.69165900  | 4.11989400  | 4.16483100  | H |
| C | 0  | 6.01551500  | -1.66349200 | 6.37972500  | H | H | 0  | -2.38353300  | 3.04082700  | 4.65620800  | H |
| N | 0  | 4.19264400  | -1.15993300 | 4.53505500  | H | H | -1 | -7.91549700  | -1.30503500 | 4.97011800  | L |
| C | -1 | 7.33161900  | -5.44369500 | 4.51348800  | L | H | -1 | -10.27792700 | -1.50334100 | 4.36528700  | L |
| O | -1 | 7.51092600  | -5.11475700 | 3.31214700  | L | H | -1 | -9.88688100  | -1.05596900 | 2.83891900  | L |
| N | -1 | 4.50282000  | -9.63386600 | -1.51007100 | L | H | -1 | -7.11114900  | 8.10147900  | -2.26680400 | L |
| C | -1 | 3.85997400  | -8.36861700 | -1.86929900 | L | H | -1 | -5.45523200  | 8.56512400  | -2.67945300 | L |
| C | -1 | 4.70317500  | -7.19653100 | -1.32475300 | L | H | -1 | -6.53077300  | 9.50992800  | 0.91882300  | L |
| C | -1 | 3.87210200  | -5.95381600 | -1.08329800 | L | H | -1 | -5.53237200  | 7.86599200  | 2.54632700  | L |
| C | -1 | 3.04417100  | -5.83739500 | 0.04526800  | L | H | -1 | -4.57425900  | 6.06410400  | -2.40789400 | L |
| C | -1 | 2.24505300  | -4.73647600 | 0.23156300  | L | H | -1 | -3.22444600  | 4.19054900  | -1.46367900 | L |
| C | -1 | 2.25680000  | -3.72750200 | -0.69827700 | L | H | -1 | -3.82633700  | 5.59932500  | 2.55446200  | L |
| O | -1 | 1.46691500  | -2.63427600 | -0.52701700 | L | H | -1 | -2.87799100  | 3.95881300  | 0.95733400  | L |
| C | -1 | 3.05820800  | -3.81927500 | -1.82376700 | L | H | -1 | -5.84251200  | 10.65861500 | -1.09110800 | L |
| C | -1 | 3.87184500  | -4.92479100 | -1.98942200 | L | H | -1 | -8.61278900  | 9.86905100  | -1.62804900 | L |
| C | -1 | 3.63408200  | -8.24629500 | -3.38030000 | L | H | -1 | -8.12305200  | 11.32487200 | -1.08391900 | L |
| O | -1 | 4.48673500  | -8.70653300 | -4.18325400 | L | H | 0  | 0.33416100   | 4.65596400  | -4.15761800 | H |
| N | -1 | 3.41626000  | -5.42131400 | -5.41031500 | L | H | 0  | 2.70813000   | 4.15753900  | -4.53608900 | H |
| C | -1 | 4.06164300  | -4.34088300 | -6.13976200 | L | H | 0  | 3.06111100   | 4.29461400  | -2.80604200 | H |
| C | -1 | 4.41953700  | -3.17050700 | -5.19967500 | L | H | 0  | 2.60371800   | 5.74086200  | -3.74557600 | H |
| C | -1 | 4.20292000  | -1.82957100 | -5.85846700 | L | H | 0  | -0.10926100  | 2.73287200  | -2.87538400 | H |
| C | 0  | 4.78707500  | -0.66362700 | -5.06176500 | H | H | 0  | -0.56331600  | 4.69838500  | -1.82604700 | H |
| N | 0  | 4.17556500  | -0.48899500 | -3.75342800 | H | H | 0  | -0.44357800  | 7.10484800  | -1.91732600 | H |
| C | 0  | 3.15109200  | 0.32594400  | -3.44837200 | H | H | 0  | 0.80356400   | 7.03410700  | -3.00809800 | H |
| N | 0  | 2.53266900  | 1.06864700  | -4.39116500 | H | H | -1 | 4.73746000   | 7.45001300  | 1.06543500  | L |
| N | 0  | 2.79211500  | 0.43323900  | -2.17629200 | H | H | -1 | 3.64175000   | 8.39367800  | 0.05113400  | L |
| C | -1 | 5.26929400  | -4.72800000 | -7.00175900 | L | H | -1 | 3.48204200   | 7.89341100  | -2.42551100 | L |
| O | -1 | 5.40156100  | -4.24114500 | -8.15456600 | L | H | -1 | 6.33071500   | 5.87663400  | 0.06228100  | L |
| C | 0  | -0.52799400 | -0.56340200 | 3.07413500  | H | H | -1 | 4.75604800   | 7.21953100  | -4.44521800 | L |
| O | 0  | -0.84357900 | -0.23778000 | 4.39887900  | H | H | -1 | 7.61088900   | 5.19806100  | -1.92434500 | L |
| C | 0  | -1.55628100 | 0.05347300  | 2.07565900  | H | H | -1 | 7.71975500   | 5.28041900  | -4.14460700 | L |
| O | 0  | -2.68919600 | -0.78968000 | 1.96142200  | H | H | -1 | 3.38165300   | 5.35636200  | 0.67747800  | L |
| O | 0  | 0.83584500  | -0.12626300 | 2.91415800  | H | H | 0  | 1.73972700   | 7.14084300  | -1.10601300 | H |
| C | 0  | 1.34044100  | 0.25466100  | 1.64203100  | H | H | 0  | -1.41772900  | 5.09182200  | 4.09227900  | H |
| C | 0  | 0.35313800  | 1.16205500  | 0.87956200  | H | H | 0  | -0.92252100  | 4.60528200  | 2.48673500  | H |
| O | 0  | 0.87412200  | 1.48208800  | -0.41099000 | H | H | -1 | -0.21468500  | 6.97619600  | 2.98445600  | L |
| C | 0  | -0.99111500 | 0.45477100  | 0.71146700  | H | H | -1 | 1.94396200   | 4.97673700  | 2.54533800  | L |
| O | 0  | -1.94680000 | 1.33153000  | 0.10590200  | H | H | -1 | 7.27071700   | 5.58779200  | 2.49362500  | L |
| C | 0  | 2.66066400  | 0.96397800  | 1.93861500  | H | H | -1 | 7.03572000   | 6.69854700  | 3.84178200  | L |
| O | 0  | 3.73582800  | 0.04727500  | 2.27746200  | H | H | -1 | 6.59209600   | 3.64906700  | 3.94640900  | L |
| H | -1 | -2.57983000 | -5.88751900 | -0.26426900 | L | H | -1 | 6.33769400   | 4.75027100  | 5.30876800  | L |
| H | -1 | -3.10294100 | -5.05211200 | -1.73446200 | L | H | -1 | 4.28707900   | 3.19724800  | 4.45773500  | L |
| H | 0  | -0.17431900 | -4.91465700 | -0.79140100 | H | H | -1 | 3.00914000   | 4.05536700  | 3.73802800  | L |
| H | 0  | -1.00719900 | -3.86210600 | -1.97014700 | H | H | -1 | 8.91299500   | 4.24576400  | 4.00760100  | L |
| H | -1 | -1.53021500 | -6.46571100 | -3.13608100 | L | H | -1 | 9.85686800   | 5.57088700  | 5.75348700  | L |
| H | -1 | -3.35060000 | -7.90274200 | -1.32989000 | L | H | -1 | 8.66590200   | 6.67643900  | 5.62557500  | L |
| H | -1 | -3.73025000 | -7.17439200 | -2.75516000 | L | H | -1 | 8.18810800   | 0.21330500  | -3.11488600 | L |
| H | -1 | -1.67125000 | -5.00797500 | 3.01387600  | L | H | -1 | 9.19934700   | 1.66735900  | -3.17743400 | L |
| H | -1 | -2.59900100 | -4.08705200 | 4.20637300  | L | H | -1 | 9.89252400   | 0.90725700  | 0.26291400  | L |
| H | -1 | -1.22016600 | -4.71612400 | 6.77491700  | L | H | -1 | 8.04700900   | 1.61338700  | 1.86799800  | L |
| H | -1 | 0.39803300  | -4.00751500 | 2.85474600  | L | H | -1 | 6.12152600   | 1.91450400  | -3.07420200 | L |
| H | -1 | 0.87033000  | -3.90147200 | 7.78550600  | L | H | -1 | 4.02490300   | 3.01306200  | -2.21830700 | L |
| H | -1 | 2.47217200  | -3.17721300 | 3.83964800  | L | H | -1 | 5.60690500   | 3.02686400  | 1.79963400  | L |
| H | -1 | 2.91952100  | -3.06804800 | 7.34300300  | L | H | -1 | 3.76055600   | 3.51061900  | 0.18978000  | L |
| H | -1 | -3.02974700 | -5.97457600 | 5.61537600  | L | H | -1 | 9.99030000   | -0.81974000 | -1.51096700 | L |
| H | -1 | -1.89236300 | -8.05279600 | 5.24294200  | L | H | -1 | 12.16805200  | 0.06377800  | -1.95777000 | L |
| H | -1 | -0.89040700 | -7.35560300 | 4.15577000  | L | H | -1 | 11.53337000  | 1.39230700  | -2.66032300 | L |
| H | -1 | -5.56062800 | -4.72656200 | 0.25988000  | L | H | -1 | 6.35417600   | -3.81686100 | 1.68968800  | L |
| H | -1 | -7.28373700 | -4.32082100 | 0.25820500  | L | H | -1 | 5.11749800   | -3.96789100 | 0.41488800  | L |
| H | -1 | -8.38688600 | -5.09108700 | 2.74388800  | L | H | 0  | 5.81920000   | -1.62829100 | 1.55198300  | H |
| H | -1 | -4.43554600 | -3.54036500 | 1.97670600  | L | H | 0  | 7.16255300   | -1.65110200 | 0.39618400  | H |
| H | -1 | -8.25111700 | -4.31560700 | 5.07196400  | L | H | -1 | 6.78394100   | -4.22424100 | -1.34506900 | L |
| H | -1 | -4.29887400 | -2.75892100 | 4.32540000  | L | H | -1 | 6.65755000   | -5.91701600 | 0.79301900  | L |
| H | -1 | -7.10100400 | -3.21181600 | 6.48031700  | L | H | -1 | 8.23895500   | -5.82088200 | 0.43212300  | L |
| H | -1 | -7.91126000 | -6.58382000 | 1.09730400  | L | H | -1 | 8.54937200   | -2.86016500 | 6.49738200  | L |
| H | -1 | -6.03581700 | -6.84732600 | 2.53014300  | L | H | -1 | 8.02178200   | -2.80405700 | 4.81105600  | L |



|   |    |             |             |             |   |   |    |              |             |             |   |
|---|----|-------------|-------------|-------------|---|---|----|--------------|-------------|-------------|---|
| H | -1 | 6.22766400  | -3.76011800 | 7.13472100  | L | H | -1 | -0.96026300  | -8.17044000 | -0.53213500 | L |
| H | -1 | 5.70994900  | -3.49168900 | 5.47256600  | L | H | -1 | 2.72799300   | -7.74090500 | -3.73862100 | L |
| H | 0  | 6.85080500  | -1.06622900 | 6.78615500  | H | H | -1 | 10.45499800  | -1.97897800 | -3.61650200 | L |
| H | 0  | 5.18583800  | -1.55619100 | 7.10286300  | H | H | -1 | 10.10813500  | 7.06802600  | 3.43777500  | L |
| H | 0  | 3.92107900  | -2.13883300 | 4.34440900  | H | H | -1 | -5.54462100  | 11.26862900 | -3.46413400 | L |
| H | 0  | 3.49665600  | -0.79073600 | 5.19367300  | H | H | -1 | 1.90585600   | 6.78374100  | 4.95044000  | L |
| H | -1 | 8.00075300  | -5.35157400 | 6.58213000  | L | H | -1 | -5.47598200  | -0.80625500 | -5.43667900 | L |
| H | -1 | 10.17688500 | -4.61433700 | 6.02384200  | L | H | -1 | -4.25395900  | -7.46265500 | 4.00093100  | L |
| H | -1 | 9.83460100  | -4.55632100 | 4.42884500  | L | H | -1 | 6.56597600   | -6.18017100 | 4.78622200  | L |
| H | -1 | 5.17866900  | -7.47386400 | -0.35997000 | L | H | -1 | -1.45422200  | -1.91492400 | -7.42463300 | L |
| H | -1 | 5.53726800  | -6.95955400 | -2.01506300 | L | H | -1 | 6.00607300   | -5.43928800 | -6.60678000 | L |
| H | -1 | 3.03004900  | -6.65484600 | 0.77550200  | L | H | -1 | 9.05645900   | -3.50962200 | 0.76466200  | L |
| H | -1 | 4.41457100  | -4.58402200 | -2.90698500 | L | N | -1 | -9.91460400  | 2.16407800  | -2.57559300 | L |
| H | -1 | 1.61746100  | -4.67179700 | 1.13384100  | L | C | -1 | -8.55439900  | 1.65190700  | -2.28591300 | H |
| H | -1 | 3.10457800  | -3.00984500 | -2.57279800 | L | C | 0  | -8.20769600  | 1.78868900  | -0.79121700 | H |
| H | -1 | 1.00285000  | -2.71129500 | 0.30807900  | L | C | 0  | -6.83654800  | 1.28454600  | -0.41786300 | H |
| H | -1 | 2.85677100  | -8.36688100 | -1.37231700 | L | N | 0  | -6.66513600  | 0.00404100  | 0.08434200  | H |
| H | -1 | 4.67620600  | -9.65263000 | -0.52573600 | L | C | 0  | -5.38206800  | -0.15932500 | 0.40551400  | H |
| H | -1 | 5.36792800  | -9.74274500 | -1.99774800 | L | N | 0  | -4.71836000  | 0.96794400  | 0.12238100  | H |
| H | -1 | 5.47483900  | -3.26928400 | -4.86584700 | L | C | 0  | -5.60165600  | 1.88076400  | -0.40442300 | H |
| H | -1 | 3.82326900  | -3.21468300 | -4.24656000 | L | C | -1 | -8.47194600  | 0.16286800  | -2.72332900 | L |
| H | -1 | 4.65180200  | -1.82862900 | -6.87439500 | L | O | -1 | -7.45276500  | -0.25593000 | -3.27082800 | L |
| H | -1 | 3.11554700  | -1.65894200 | -6.02732600 | L | N | -1 | -9.49490200  | -0.61582700 | -2.38195400 | L |
| H | 0  | 5.86745000  | -0.82392800 | -4.89025300 | H | C | -1 | -9.48829700  | -2.04827900 | -2.59412900 | H |
| H | 0  | 4.69987000  | 0.27752700  | -5.63742700 | H | C | 0  | -8.75023800  | -2.81091600 | -1.47561900 | H |
| H | 0  | 4.60367200  | -1.01175100 | -2.96099700 | H | C | 0  | -9.28181800  | -2.43043800 | -0.04703700 | H |
| H | 0  | 3.33230800  | -0.04366700 | -1.43664300 | H | O | 0  | -10.15068400 | -3.15455900 | 0.44442400  | H |
| H | 0  | 1.94097200  | 0.90404600  | -1.86902300 | H | O | 0  | -8.77564700  | -1.36700600 | 0.47325900  | H |
| H | 0  | 2.53424100  | 0.76471500  | -5.35176900 | H | C | -1 | -10.88829300 | -2.61960700 | -2.73928300 | L |
| H | 0  | 1.80744800  | 1.72644300  | -4.07918500 | H | O | -1 | -11.89080200 | -1.89339400 | -2.51310000 | L |
| H | -1 | 3.26840400  | -3.87919200 | -6.80573100 | L | H | 0  | -8.94053400  | 1.23226400  | -0.17558500 | H |
| H | -1 | 3.71999300  | -5.37537200 | -4.45621400 | L | H | 0  | -8.27401100  | 2.85330400  | -0.49518600 | H |
| H | -1 | 2.30534400  | -4.76388000 | -5.62327800 | L | H | 0  | -5.26548800  | 2.84852600  | -0.75005500 | H |
| H | 0  | -0.57279300 | -1.65405200 | 2.96905400  | H | H | 0  | -3.68414700  | 1.07097800  | 0.19633900  | H |
| H | 0  | -0.68652500 | 0.73286800  | 4.47571500  | H | H | 0  | -4.91766500  | -1.04579100 | 0.80787200  | H |
| H | 0  | -1.91142700 | 0.98197600  | 2.53599100  | H | H | -1 | -7.79018300  | 2.21624500  | -2.87943300 | L |
| H | 0  | -2.47430400 | -1.58624300 | 1.42012500  | H | H | -1 | -10.38517800 | 2.45876000  | -1.74499300 | L |
| H | 0  | 1.53475600  | -0.63120400 | 1.01470800  | H | H | -1 | -9.85701400  | 2.92955700  | -3.21135400 | L |
| H | 0  | 0.19887500  | 2.08280900  | 1.45418500  | H | H | 0  | -8.89333400  | -3.89889800 | -1.61317700 | H |
| H | 0  | 0.97183600  | 2.45189300  | -0.48028900 | H | H | 0  | -7.66240400  | -2.60280900 | -1.54347900 | H |
| H | 0  | -0.83844300 | -0.44186700 | 0.09235600  | H | H | -1 | -8.93724400  | -2.27262000 | -3.54514200 | L |
| H | 0  | -1.70462300 | 1.57345800  | -0.82094000 | H | H | -1 | -10.17960900 | -0.27267800 | -1.73857600 | L |
| H | 0  | 2.50637300  | 1.64257700  | 2.78306300  | H | H | -1 | -10.99615700 | -3.67476600 | -3.01782200 | L |
| H | 0  | 2.97432700  | 1.54169100  | 1.06066000  | H | H | 0  | -7.51099600  | -0.70439200 | 0.20541300  | H |
| H | 0  | 4.00093100  | -0.37026400 | 1.38887200  | H | C | 0  | 5.61525100   | -0.98141100 | 5.02828900  | H |
| O | -1 | -7.55326600 | 11.06428100 | -3.79381400 | L | H | 0  | 6.25620500   | -1.31506600 | 4.20727000  | H |
| H | -1 | -8.52602600 | 0.81447400  | 6.02711600  | L | H | 0  | 5.73237500   | 0.09961300  | 5.11756700  | H |
| H | -1 | -7.62232800 | -7.04867200 | -1.30567100 | L | H | 0  | 4.02306600   | -0.66063700 | 3.65863400  | H |
